# Supplementary material for: tec-1 kinase negatively regulates regenerative neurogenesis in planarians
Source: eLife. 2020 Jan 20;9:e47293. doi: 10.7554/eLife.47293 (PMC6970515; doi:10.7554/eLife.47293)
Supplement: Supplementary file 1. — Table describes ddv6 contig identifier from Planmine, provisional name, and blastx annotation information obtained from Planmine, as well as primers used for cloning cDNA for each gene. [file elife-47293-supp1.xlsx]

## Sheet: Sheet1
ddv6	gene name	category	NCBI	blastx.species	blastx.target	blastx.evalue	panther	panther.eval	ddv6 contig sequence	primer.L1	primer.R1	primer.L2	X1.FKPM	X2.FKPM	Xins.FKPM	X1/Xins	X2/Xins
unc22	ctrl	control	Ce-UNC22	C. elegans	UNC-22	0	NA	NA	ATGGTTGGCGCACCGCGCTTCACCCAGAAACCGTCCATTCAGCAGACACCTACTGGTGATCTGCTGATGGAATGTCATCTTGAGGCGGATCCACAACCAACGATCGCCTGGCAACATTCTGGAAATCTTCTGGAACCATCTGGAAGAGTTGTGCAGACACTTACCCCGTTAGGAGGAAGTCTGTACAAGGCAACATTAGTGATCAAGGAACCAAATGCCGGCGACGGTGGTGCCTACAAATGCACAGCAAGAAATCAATTGGGTGAATCGAACGCCAATATCAATTTGAACTTCGCTGGTGCCGGAGGAGATGAAGCCAAGTCCCGTGGCCCATCTTTTGTCGGAAAACCACGAATTATTCCAAAAGATGGTGGAGCTCTGATTGTGATGGAATGCAAA…	TGACCTCAACGGAATGTTTG	CATGCGCCAAAGTTAAGGAT	TGACCTCAACGGAATGTTTG	NA	NA	NA	NA	NA
dd_Smed_v6_11285_0_1	NDK	control	Smed-NDK	NA	NA	NA	FIBROBLAST GROWTH FACTOR RECEPTOR	4e-50	ttctaattaccagtaagaattaatatttgaatttcaaattcgtattcgcatttcaataatattaaaaaaaaacaacagcaaaattttctctgataccaaaaatcaattaaaaataaatcaaatcaatttctcgaagattttcaatttggattttaatattatcactaacaaaaaaaagttatgtggagcttctttatttcctggatgatattcagctacatcaaatctatacattgcacaataccgattgtcaaacccttcaatcctgacattacgttaaatagcggtgaagaattgaagttggagtgtccgattgtgatgtcaagagaaggaaccgacgtgaattatccatccaatctcatgtatgaatggaacataaagggtcaaaccgaagtctca…	CATTGGCGAATTGGATTCTT	AAAGCTGACAAACTGCAACG	CACGGAGGGTATCAGAGGTC	NA	NA	NA	NA	NA
dd_Smed_v6_6020_0_1	TK2	TK	Smed-FGFR1	Drosophila mojavensis	GI23882 gene product from transcript GI23882-RA	4e-53	TYROSINE-PROTEIN KINASE	7.4e-102	aatttttagatattttttgtgaatataaagtattatgaaatgattaaatttaattccagtcatttttattggtttattttcattgtcgaaatagttaatggaatgttcgattttccatcaacagattcatgttatgaaattagaacatttgaatcaaaactttctaagcttgaatatcaaacagctagactatcttgtcacatcaatgttaaaaaaaggtgtcggaaaggatctgtacgatgggcttggtttaaagataatattcaaataaaaaatggcacccagaaaaaaactcgttctcaaatttatatagagcatttaatatataatacaacaatgagcgatactggagaatatcattgtttagtgcaaaataatgtcttcaattatagtcaatat…	CTGTACGATGGGCTTGGTTT	TCATTCCTTTTCCGATTTGC	CAGTTTCAGTGGGAACTCCAG	54.08	44.994	1.0505	51.4802	42.831
dd_Smed_v6_17134_0_1	NPFFR1	GPCR	NA	Aplysia californica	neuropeptide FF receptor 1-like	4e-09	G-PROTEIN COUPLED RECEPTOR-RELATED	5.6e-24	taattaaaaaagtaatacaacggtcctcaaaattactgaatgatttcaaaaccattttattgatttattttattatttaaattgtacgaatgaaacgagagaagagtcgaatgaatagcatgattcatagccaatgggacacacaaacaaagcctatttgccaaagccaatcgtcataatcaccaatcgccaatcacctaatgtatcaatctatatcgaatctttattctcagaaagtagataaaaaaaccgaccttataatttactacaaatacggttcgaaataatatttttatatcttaattttgtttcgtcagctgacctatctcatttacttgactaacaattttaaaagtacaaatatggtcaaagtatgttttgcattgttgaagcttttga…	CTGGAATTGCAACCGTTTTT	TTCCATAACCAATGATGCTGA	AGTTGTTCCGCTCAGTCGTT	9.989	6.087	1.849	5.40238	3.29205
dd_Smed_v6_8643_0_1	GPCR3	GPCR	NA	Bombus impatiens	neuropeptides capa receptor-like	6e-10	G-PROTEIN COUPLED RECEPTOR-RELATED	1.2e-48	gttaattaatgtaataattatttaaaaaacatataatttctatgctgaatcttttttaatgcctttaacttatttcatttgatctagtatatttaaatattaaaatgtcgcaatttaattttaccaatatttctcgatttattaactgttcagatagaaaaacaacacatctcgaaatttttacacctattccaagttatggaacagcagtatttggcgcctattttttgccaattatcattatacttggaactacaggaaatattatttcattgataatcttgagccgggcagcaaaaacaatttcatcgcacttctatctttggtggatggcagtatttgatataatatcgcttttgagttacataccaacattctgggccgttatgattttgcgtc…	AAAATGTCGCAATTTAATTTTACCA	GATCTGGATAATAATCCGACAACA	GCAGTATTTGGCGCCTATTTT	14.4855	10.706	6.9585	2.0817	1.53855
dd_Smed_v6_8973_0_1	LRTK	RTK	NA	Homo sapiens	leukocyte receptor tyrosine kinase	5e-59	UNCHARACTERIZED	3.3e-48	aaaatattttataattaacaaaattaagttgtttaaatattgcctttattaaaaaatttatctgaaatggataatgaaaacttgggcaataaatatactgtttatgatgaacaaagaaagcatttagaaaaattaatgagtgagccagataaaccagtacatattccgagtcctgctaaagaacgtaaacctagagagcccagggagtttattagaaacatttggggatcatccgctggtgttggtagtggagattttcacatttaccgtggaattcgtcgtcggcaaatggaaagagaagaatatatggaaaagaagagtaaaactgaaacgcttgataatgaatattccgaaaagcaaaaatcattaaatgaaaagtgtgaagaaaaaactgcgaaa…	CACCCGGGAATTTTCTATCA	TCGATTTCCAGAAACCTTGG	CAAGGATGATGTTCCGGATT	21.5275	4.7335	4.584	4.69623	1.03261
dd_Smed_v6_9381_0_1	RYAR	GPCR	NA	Drosophila melanogaster	RYamide receptor	8e-47	G-PROTEIN COUPLED RECEPTOR	8.2e-76	gctgctattggtcgcctgatcggccaatagcagcagttctcatcaatccactattgtcgcatttttaatgtcccacattaccggcaatgttacctttgaatcagtcgaatttcagcttacctttcagtgatattctgtttccttatcttcaatacatttatggcttcttttacgtttcgatatttatccttggagttgtcggcaatttggccgtttgttacataatctcttgccgtttgcggcagtcagccacctcgatatttttactgaatctcagtttggccgatttgaaaatggccctattttgtgttccggtcacatttttctccgactgcatctttatgagatggattttcggacgagcaatgtgccacgtatttcctttcgtgcaagctctca…	GGCCAATAGCAGCAGTTCTC	CGCTCATGTAGCTTTGCATT	TGGCTTCTTTTACGTTTCGAT	38.3505	39.8675	13.0175	2.94607	3.06261
dd_Smed_v6_3363_0_1	HCK	TK	NA	Aplysia californica	Src tyrosine kinase 1	1e-153	TYROSINE-PROTEIN KINASE	1.7e-192	aattaattaaatatttattttgaaaactttattatttttgaaaatcgaatttttcatgtttcatttataaaattgcgctataaaaacatcatgggaaattgtgtaaaaagacccacctcaaacccgagcacctcaagtccacagcaaccagttgataattacatctttgacacaattcctcaagaaacgactatgcaagtagcgagtgtccgagttcgggcattatacaattataatatccacaatgcaggagacttggcgttttgtaaaggggatataatggttgttagttccgatttaaatgagccttggtggttcgcgactcatcaaggaaattttcaaactgggtacattcccagcaattacgtgtctgttgatgatggaactccgacaagtcat…	TTGCGCTATAAAAACATCATGG	CCACCATTGTCAAGAGTTCG	TCCGAGTTCGGGCATTATAC	8.901	14.6995	34.0405	0.261483	0.431824
dd_Smed_v6_5170_0_1	XPR1	signaling other	NA	Drosophila melanogaster	CG10483 gene product from transcript CG10483-RA	2e-159	XENOTROPIC AND POLYTROPIC RETROVIRUS RECEPTOR 1-RE	9.1e-217	cttgcaataatcaaattaaataaaattctctatacttactgattcgataagattaatttatttttaaatactaaatgaaatgaagttttctgaacatttatcatctcatttaactccagaatggagaacacaatacataaattatgaatttcttaaagaatatttgtacaaatgcttaaatgagcgctctaatgattatgtcactcaagaacaaataaatggatattatctcgaatgcgatgttgaattcattcaaatgtgtcttcaggaattgaaaaagattaacaattttttttcagagaaattatccgaagcgaaacgtaaattcgacaacttgaaacaagagttagatacatatcacgaacacgtagaaaacaagcatgcgaacagcattttttc…	CATAGGCGATTATCGGTCGT	CCGAAAGATATTTCCCAGCA	CACGACCTGAAATTGGGATT	10.258	11.1955	10.0915	1.0165	1.1094
dd_Smed_v6_5900_0_1	ITFG2	integrin	NA	Homo sapiens	integrin alpha FG-GAP repeat containing 2	4e-44	INTEGRIN ALPHA REPEAT DOMAIN-CONTAINING	1.7e-73	aattaggagaatatttaaatattttgaatgtttgttcggcccataaattttgtcgattatttcgagattttagacacaaaaacttcatattcagctaatcttttcttatacgatgttgataatgacaatgatattgaattaattattggaaattgggattctggcgatttacagaattacggagaagccgatgtcgaacacagtaaaggcgaactaagtattgttaagtatggagttgtctggaaaaagacaactgtagacggtattgtttcttgtatttctgcaggaaaaataactaataaacatttcgctgatatcatagtattttgcacaaattgtatttgcaatttctttcaaattgttcttttaaagaatgatgaaaccggagaatcgtgtcaa…	AATGTTTGTTCGGCCCATAA	GCGAAGGAACTTTTGCATTT	TTGGGATTCTGGCGATTTAC	35.2925	47.718	16.505	2.13829	2.89112
dd_Smed_v6_17433_0_1	GPCR5	GPCR	NA	novel	novel	novel	G-PROTEIN COUPLED RECEPTOR-RELATED	1.6e-26	cccattttttctgcaataatccaactgcatatgattaattctttggattaccttcaactataggaaacctgatgacattttgataactgctcagcatgatttcattccaacctccaacagaactcaggaatattcaattgtcataagtttaaaccaaacaacaaaatcaaccaatcattttcaacgaatataaactaatgagattttgcattattactcattcataattaagtaatggataattcgagcttgataccggaatttttaattttcattagcaataaaacctgcagcaaatggctatcgattcatgaagaaatgcatttgaaatattggtcgatttttgtggcatctcttgtgatatgtacgattaatatcattaccaatagtatagctttt…	CATTGTCCGCGTCTGAAGT	CCGAAAACTTTTGTTTGAAAGC	CGTGTTGCTTGGTGAAATTG	3.474	2.8255	1.6255	2.13719	1.73823
dd_Smed_v6_7988_0_1	DDR2b	RTK	NA	Acyrthosiphon pisum	discoidin domain-containing receptor 2-like	8e-32	TYROSINE-PROTEIN KINASE RECEPTOR	1.8e-38	gaattaaaatcctaactcataaaaacatggatcaaataatacgttggagtaatacagacaccgagatctgagtagttagacatcaaccaatcacaatgaattatttttcgagtagatagagatctaatgcacacacacatgctgccatcagagtcaagtagtcaattcgatatgcatgtgcgctatttgacggtttgcaatttcattcatattggactgctcgcaatatactcgatcatttaaaattgatgcagttttcaagcaatgaattcgattgttggtttctaatcacaatcattttcctttcatcgcaattatcagcgaatactgaaacatcacctcgaaaagacgctgatggttattgtgcaacgggaatattgcaggattcacattctattc…	TTGAGAATCCGGCTTTATGG	TCTGAGAAGCGGGAGCTAAC	GGGCAAAAATTCTCCAATGA	28.0835	10.6755	18.9325	1.48335	0.563872
dd_Smed_v6_9474_0_1	SMO	GPCR	Smed-smoothened-like	Drosophila melanogaster	smoothened	5e-16	FRIZZLED	2.4e-25	cgattgttttaaatttatattaattatctaatgctacatttattcaatatttatataattattttattattcatttgtgttagttcacaatttgttaactattctatttttcgaaacaactttgcaatgaattattcctatagtagggaagggtgtgctgagcctgtcagtgaatgccaattacttaataatgtattagaaaactcaacatgttttaatattaaatttacttttatgtatacatttcctaatactaactttcttgacattaattattggtctgccgttaaatctattccaaaatgttggaagtatttacaaattttactatgttctctgaagtatcctgaatgtcaaaaaagaaaatctacatggatgattaataagccattccgtaaa…	AAAAACGAGGGTGAAAATAATTG	TGAGGACATTGAAGAATTGAAAA	TTCGATATGGAATCCTGGAA	19.13	18.367	10.1505	1.88464	1.80947
dd_Smed_v6_6633_0_1	ILGF1Ra	RTK	NA	Mus musculus	insulin-like growth factor I receptor	1e-44	TYROSINE-PROTEIN KINASE	2.5e-85	cggtaattcaaattagcataaaattaatatgataagcatacattttttaatttttattcaatctttatttatttataattttgttaatggatctaatttgcgatgtcttaaaattaaagaacatatacaatggaatagaaaatttccttataagaatacgttaattccattgattatagaagtatctcccagaccatctcatcgaattgtttcacacatcatatctattttattaagagaaagattggggtataaagtaaattttacttatcaaaactgggatcctactaatgatgttataaggcgatttagctgtcaatacaatcaatgtcatgatgggtcaccaatttctcatatcaatttagaagtttggaaaagccctggttatacttttaatga…	AATGTCATGATGGGTCACCA	GCAGCAGTGTCGTGAATGAT	AGTTTGGAAAAGCCCTGGTT	19.77	19.663	13.4775	1.46689	1.45895
dd_Smed_v6_16928_0_1	EPHA2	RTK	NA	Danio rerio	eph receptor A4b	0	TYROSINE-PROTEIN KINASE RECEPTOR	6e-269	cttcgattgatttctcagggattcacagttacggtagcattatgtgccaactgatcaatgctattttgatctcggttttctcaattgttaattgcagagttcctaattatgttgaactattgaacacagaaacaagcagatggaatgattgggtaaaaaattctgggaaatacgatggatggcgcagtcagaatattcccccaaacgcacaattagtgtatggactgtgcgctctgcaaggaggcagtcgtgataactggctccgtagtccattcataagacgagatgatgctcttagtatcaaaattgagatctctttcacaatgcgctcttgtaaatctcgaccagaacaacgacttaattgtgaagatactctttatttgatgatttatgaagccg…	TCCCGATATCACATGGACTG	CGCAAGATATTAAATCTGACGATG	GCGTCGTTCTGGATTTTTCA	4.6495	3.826	3.0605	1.5192	1.25012
dd_Smed_v6_11934_0_1	PLXN1b	RTK	NA	Caenorhabditis briggsae	C. briggsae CBR-PLX-1 protein	5e-78	PLEXIN	3.9e-119	ttttatttatttcttcttatttttaattgtaactagaatatttttaattcaatgatcaagacaaaaagatttctcattttatctgttatcaatattttcataactgaaatttgtgctttgacatcagaaatatttgtttataaatatgaaaaccttgataagataatgcttcacaataataaatcacataaatctattcttgtgtcagggaaaaattatatattgcaattttcagaaaataatttaaaggaacctttagcaatcagaaagaccgggccggtaaaccattccgttatgtgcacggaacctaaccagtgccaaacctcattatgtccaaaagaattgatttcacgtgatcaatgtagaataaagttaacagatgtttttgttaaattatgg…	TGAAACACGAATTCTTTGAAAATG	TTCCAAGATCGTTATCCATTCA	TGAAGTTCCTGAGAGTGAACGA	4.279	6.4	2.9195	1.46566	2.19216
dd_Smed_v6_5979_0_1	TMEM181	TM	NA	Homo sapiens	transmembrane protein 181	8e-108	FAMILY NOT NAMED	1.8e-134	attgtgttttgtcatatcaattaaatgtttcaaatattattttaatttgaaaagtgtacaatttacaattttattcttacaatgttttctagggaaatagaatcttctgtacaaatgcgactctattcaatgtccaagcgacattttgtagttgtaatatgcttattttttctctcatttacattaactcttctaattggaatagcaggtcctccaatcattatttcatattctaacaataacagtaaagttagccaatttaatgaaatgaaaaaattttactcaaattcggtcgtatccaaatcaatgtcagtgtttaaccagcaactgtggctcaccgcaacaataactacaaaagacgacgaagaaaaatttccgaaggtaaatgtgacagtgaat…	CTCAAATTCGGTCGTATCCAA	AAACCCTTCGGTAACCTGTG	GGCTCACCGCAACAATAACT	11.742	22.2855	11.4445	1.026	1.94727
dd_Smed_v6_10020_0_1	NPFR1	GPCR	NA	Aedes aegypti	neuropeptide f receptor 76f	4e-80	G-PROTEIN COUPLED RECEPTOR	7e-113	gtaaattttcttgttttttctactcatgaaaataaaaataaataccatttgaaaacaagaattcatcatattaagataatttattaaatgaattacttctattaaataaaattttaacttttcaaagagagtatatagtaattattctcgcaatgattttatcgaatggcacaaatgacatattcaagaatcacgagggacttcagtatttagtgattgccggttattcaataattttcgttttgggagtggtcggcaacagctttgtcatatttgtggtaatgcgcagtcgtcatatgcggacaattacaaacatttttattagcaatcttgcactctctgatatcattatgtgtttaattgcagtaccatttacgccaattgctttatttatgaata…	CCATTTGAAAACAAGAATTCATCA	TGAGAATCAGAGTTCGGAAGG	ATCGAATGGCACAAATGACA	15.4195	10.887	14.8155	1.04077	0.734839
dd_Smed_v6_2366_0_1	SHARK	TK	NA	Drosophila melanogaster	SH2 ankyrin repeat kinase	7e-68	TYROSINE-PROTEIN KINASE	9.1e-154	catatttgttttactttaataacatgtaaacagtttttagtcttgaaattgactaaaatattaagtttattttaaaattaaaaaatgctagatccacagaataatattaatgcttctcatgcccatattataagaaatcaatctgtggtggcatgtgatcagccccaaataagatcacaatcaggatttagcaaagttgaaccttcaaggcctgttttcaatagtaaccctgatccgaatgtaaaatgttcttcggtaaattccggacttagtaattcatattctcattggtatcacggaaatatatcacgagaggatactgaacgtttattaaaacatcaatctgccaatggaacttttttgataagatacagtatctcaactgggaaatatgtttta…	ATCGTTTGCACATGTTGCTG	TGGAAGCCTGACACCTTCTT	GCAATGCTTGGTCATTCTGA	54.831	74.0055	56.5695	0.969268	1.30822
dd_Smed_v6_7733_0_1	CALCR	GPCR	NA	Homo sapiens	calcitonin receptor	6e-52	G-PROTEIN COUPLED RECEPTOR	4.3e-75	ctgtaattgcattctaatcttttctaaaaaagtttatatagtaaatgattaaaaatagaataaatgaatttcctatttgattggctaatcatctcaaccaatcggaaatgcggtaattttattattttaagacgatatatttttaatcaaaattgcttgatattcgagaaatagaaaatcgcacattatcgagtgacaatattctaaacaaacgtgaattaatccacaacccaacgaaactagtgaaagatgttttgaataactgtagttatttatttgcataccgacacatgtttacgttaagtaaatagtgtgaagcaagttctttttttattatagcagttcagtaattgccagtcaccataaatcgaattttagttggaattattagaaccgcaa…	TCGCACATTATCGAGTGACA	AATCACGCTTGACTGAATGCT	AATCCACAACCCAACGAAAC	12.524	8.3085	9.434	1.32754	0.880697
dd_Smed_v6_6633_0_1	ILGF1Rb	RTK	NA	Mus musculus	insulin-like growth factor I receptor	1e-44	TYROSINE-PROTEIN KINASE	2.5e-85	cggtaattcaaattagcataaaattaatatgataagcatacattttttaatttttattcaatctttatttatttataattttgttaatggatctaatttgcgatgtcttaaaattaaagaacatatacaatggaatagaaaatttccttataagaatacgttaattccattgattatagaagtatctcccagaccatctcatcgaattgtttcacacatcatatctattttattaagagaaagattggggtataaagtaaattttacttatcaaaactgggatcctactaatgatgttataaggcgatttagctgtcaatacaatcaatgtcatgatgggtcaccaatttctcatatcaatttagaagtttggaaaagccctggttatacttttaatga…	AACCACTGGGAATCAGTTGC	CGGTTTCTTGATGACCCATT	TGCGTAATCTTGACCATCCA	19.77	19.663	13.4775	1.46689	1.45895
dd_Smed_v6_9006_0_2	IGF1R2	RTK	NA	Apis mellifera	insulin-like receptor-like	6e-87	TYROSINE-PROTEIN KINASE RECEPTOR	8e-127	cttattgaaacaataaataaattatattttataaaaaaaattgattttgttattaaatttgtgtttgaaatttgataaatcctattgatagaatgcgataaatatttttagtgtatttgaatgctttttaacatccttcgtggtaaaaataaacctcaataaggataatatagaagttgatagtattccaaggcatattgtcagtattagctagaatttaaagtaattaacacgtcatcgataaagtgaataaaagagcatcgacctatatacattagctgtccatgttcctctgttgggtaaggggcagtgtgattgatcatgagtattcaaaccgggaattatgacaataacgtgatcgaaattcagcaatcgtttccatcactaatatttgacttg…	TCGAAATACCAGCTTCAGCA	GCAGGGATGATGGGATTTTA	CGAGCTAGCACAAGCACAAG	8.5885	9.5425	6.209	1.38323	1.53688
dd_Smed_v6_1574_4_2	GPR107	GPCR	NA	Drosophila melanogaster	CG12121 gene product from transcript CG12121-RA	9e-99	LUNG SEVEN TRANSMEMBRANE RECEPTOR	3e-166	aacctatttaaaatcaataaaatgtttaagtgtgacgctttaaaatttatactttttttattaatcgtcaatattagttatattcactgtagaaatcatgatattaaaataaagaatgacaaacgtcaatctattttactaagccattttggatattactcaaatggatatttatttctaaatataacaaagctcgatgtcaatccagttggacaatctatgtttggttttacattggatatgtcatctaccagtagtattagttcttatgtggagagttctactgggaaatgtatgctagataaaaaagaattaagaagtttatcatcaattgtcataaaatttaatcaaactgataagatcgtgaccatcgacaccgtcggcagcaagctctcgggc…	AAAGGAGAACGCGAGTGAAA	CAAACGGTCTCCTCCTCATC	CTCGGATCTCAAGCTCATCC	26.835	49.494	21.1275	1.27015	2.34263
dd_Smed_v6_7897_0_3	FGFR1	RTK	NA	Acyrthosiphon pisum	fibroblast growth factor receptor homolog 1-like	8e-55	TYROSINE-PROTEIN KINASE RECEPTOR	5.3e-101	cggaaatattttaaaacaaaatttcaatttttattccaaaaatttattcctacaaatttttttgtgctgatataaaatattgattaattaaaatgaatgcgttatctggtaactgctgcatcccgttaagattgtttgctaattgcaaaaaatcagtttatagtaacctcaattttctttaaattccgatctgttggtatttgtgtggacacagttctaagattttgaatatctattcaattccaaataatgacgatgattttgagaatcaatgctgtgagacattttctaagtcaaaaaaaatagcagtatagaatagcgtggttgatctagcggatttgacagagaacttgcattggggaatttatatggaatggtaaaaatgacattgcttgacgc…	AGATCCGAATCAACCAGGTG	TCCATTTCGCCAAGAAAAAC	CATTTTGGAATAACGCCATTTT	2.8385	0.8725	1.4695	1.93161	0.593739
dd_Smed_v6_4818_0_1	TEC1	TK	NA	Drosophila melanogaster	Btk family kinase at 29A	2e-148	TYROSINE-PROTEIN KINASE	1.8e-286	atttagtggatttataaataatattttgataaataaattatttctacaacatggtttatggaaatttattcccatataattttagatatatgctaaacgataaattataagttatatgttattaaatatgatggtatcgtctgatcaagagttgaagatttctcggatgtgtaagagaagccaacggaaaaatatattttctagagattgctataaacttaaagaatttgtattgacacctacgtatttaaaatatttcgaaatatcaggcggaaaccgaggcaaagaaaaatgtacacttttattaaactttttaaaatttgtcgaaaaggttcaagacgaggatctagataataagaaaaacgtttttcaaattgcctacgttgaggatatacttag…	ATAGTGCTGCGGAACGAGAC	AAACGTGCCATTCCAAAATC	TGGGTTGTCAAGAAGCATCA	45.259	101.086	37.194	1.21684	2.7178
dd_Smed_v6_8641_0_1	ERBB4	RTK	Smed-EGFR-1	Bombyx mori	epidermal growth factor receptor-like	3e-166	TYROSINE-PROTEIN KINASE RECEPTOR	2.9e-200	agaatatttaattatgtaaaatttgattgctggcttttacgtgttttaaattttattatggtttttactttatttcatttattgattttatcaaaatttatttattttggagattcgaaacctaatgcaacagacactagtcaatcattaacatattcattaatcgaatatccagaaattaaatattgtttcagcagcatggatttattggatggcagtcagtcttctaattataatactttgaaacaagatttgggcaacaactgtacacacgtgtatgggaatattttcataaataatgtcaaaagtgaaagtaatggttcggaaccagatttagagtttctatcaggaattaaagaaataactggttcattgaagatccgaaattcaaatatctct…	CAAGCAATTGAAAGCCTGGT	ACCCGCGTATACAGAACCAA	CAATCATATCAACCAGCTTAACCA	8.6905	21.029	7.552	1.15075	2.78456
dd_Smed_v6_9075_0_4	SYK	TK	NA	Homo sapiens	spleen tyrosine kinase	5e-77	TYROSINE-PROTEIN KINASE	1.6e-160	gtaaaacataacaattttaaattgcaatatcaaacatcattaaacaaagaaacacgcatttttattgaaattatacccggttaataaaaatcgtcagtaaacggctggtattgattttaaatgagaaaataattctggccgagtatgactcagccaatttctccaaaatctgtcaactattaccatggtagaattacacgggatcaagccgaagaacttctaatgggtcgaggtggcactgaaagcttatttctacttcgagaaagtgtcaataataattacgccgtgtcaatatgttttaacaaccgtgtgcaccactacaatatcgagcgccaaattgatggaacttatcaaataccaaccggaagacggtttattggtcccgtagaacttgttaag…	TCCAGTCGAATCTCCGAAGT	GCATTCTGGAGCGTACCATT	TACATCCCGTTCGTTGAGTG	4.277	11.786	5.1875	0.824482	2.272
dd_Smed_v6_6480_0_1	GPRK1	STK	NA	Drosophila melanogaster	G protein-coupled receptor kinase 1	0	G PROTEIN-COUPLED RECEPTOR KINASE/RIBOSOMAL PROTEI	0	ggtttaaatttaataaacaatttaaattaataaattaaattaaattttatgactttatttgtaaattagtcaatagaaaatcacaaataataatggcagatctggaggcagtgttggcagatgttagttatttgatggctctggaaaagagcaagtcaactcctgctgccagagcaagtaaaagaatatcattaccagatgccagtgttcggagcataatgcagaaatacatggacaaaaataatgaaatgtgtttcgataaaatttttaatcaaaaattgggtttccttttgttcaaggaatattgtgaacaaacaccagatgaaccggtgccttatatgaagttctatgaagagataacgaaatttgaaaatttagaaacagacgaggaaagatgca…	ACCGCGATGAGATTATGACC	AAAATCCGGTTGGATTTCCT	TAATCGGTCGAGGAGGATTC	20.329	34.662	29.117	0.698183	1.19044
dd_Smed_v6_6272_0_1	SRC1	TK	NA	Homo sapiens	FYN proto-oncogene, Src family tyrosine kinase	3e-174	TYROSINE-PROTEIN KINASE	2.1e-266	ctatataaatcttatatggcaaaaatgggaaattgtacagacaaacatgcatttattcacaagttttataaaaataataaacccggaaaatttttggatgcaattaaacctccacttatgccattggaatctggattagaagattcattgtcaaatatatctgtgcaatcctcaccacgtcataatcaaaataatattagtgattattttaaaaatcgccgtgctgattctctacctcgtcatattagtcatttaaaaatgatctttaaaaacaacgatgacaaaaaacattcaaaacctcaggagagctttcctattcccatatcacagtcttcgccgaataattttaaaagttatcaagctgatggaatttctaaaaactttgagcattcaccatct…	TGTGGAATGGCATTTCTTGA	TCTACGTTTGTGAGAGGAGCAA	CGGTGAAAACAATATGTGCAA	28.9355	60.972	39.4925	0.732683	1.54389
dd_Smed_v6_9911_0_2	JKAMP	kinase regulator	NA	Aplysia californica	JNK1/MAPK8-associated membrane protein-like	5e-41	MEDULLOBLASTOMA ANTIGEN MU-MB	4.2e-73	atcataaaatgtgtttaaataatgccgctatgtctaatgcatatttttctttaaatcatgatttattaaatttgtgatactatttgttaattattaaatgctaaattattccactaatacgaaaccgtgtccaggattttattgtggtaaaatgtctttgaatgattcgtgtggtgcatgtccaaaaggatttatctcagataattcatctatgtgtataaaatgccatgaaaagttattactgtacgattggttgtttttgggatttattgttgttcaaccgattattttcaatttctatttcaccataaaactttcgattaagtttaagtcaaatagtaaattatggattctacgattatttatgttttgtaaatctttattgtcatttcttatatc…	AATGCCGCTATGTCTAATGC	GCGATCTCAAATGTGCTACG	TACGAAACCGTGTCCAGGAT	2.898	3.3985	3.465	0.836364	0.980808
dd_Smed_v6_5635_0_1	FYN1	TK	NA	Cynoglossus semilaevis	tyrosine-protein kinase fyna	1e-169	TYROSINE-PROTEIN KINASE	3.7e-256	ctatataaatcttatatgatatgattaaacatgggaacttgcttaggaaaacctgcaggtccgatttcgaatcaggaatcaataaaaaaagaaattgtagctattcaaagaataacttcatcatacagcagtcctggactttcagatacaaaactaaatcaaccaatagtcgatgaagattcaacggctagcatcgagctaatagctcgcaatcaaataaatcctcctttcgttaaacctaaaaaccattcctatccaaacaccccgaaatcatcgtcaaataatttgattgctcatcctaattcaattgtagcatcaccgaatgaggtgattttgtctttgtctttcagtaattgttcctcgccattaacaagcacaattaattcaaaagcaaactct…	GTTCCTCGCCATTAACAAGC	GTTGGCCGATTTTCTGGTAA	ATGGGACCAGAAAACGTTCA	30.6885	57.882	37.3805	0.820976	1.54845
dd_Smed_v6_13016_0_1	PLXNB2	RTK	NA	Callithrix jacchus	plexin B2	2e-32	PLEXIN	3.3e-26	aggaaatacattcaaaactattcaataatttgccgcttggatgcccagagaatcccgattgatcaagcacttgatatcagcataaatatttcatacggagagatttgcaactccaaacattttctcggaaagatttcacttttttctcttcggactaagttcaatatttcctatatattaattagtctgtcacttttgcttctaataaccataatcattttaatttacattttaaaatgtcgaaatacctcgaaaaaagaaaacgaagcgaaaataattgaaaacagttttgaaaatcaaaaaattgagttttcagatattcaaattaaagcattcaaagaatattccatggcaatgagttctttaaataatattgggaaattctcaaatagacatttc…	TTTGGATAGCATTTCTCAGGTG	CGCTTTCACGTTGTTTTTGA	TGCTTCGATTGACCACAGAG	0.058	0.326	3.474	0.0166955	0.09384
dd_Smed_v6_5823_0_4	GPCR2	GPCR	NA	novel	novel	novel	G-PROTEIN COUPLED RECEPTOR-RELATED	7.1e-12	taacacaatacaacattcgaataaaaaatgtaaaataatttcattaaactgagccatttcgtttgtttcttaatttctgaaccaagtgtgacccctcaaattttactcctgaagacagagggaaagtgcgagattcgtttggattcgtaatttggataaaagtcccaaaatagtgggcaccaatatacactataaaattaaatgtagaatcgatacaaggcattagattcatgaaccatcctaattcttgcaacttctctgacatcgtatccaacattttcaaggttccaggtaattcacacagccaaaacacgacccccagcattgttatcagtagatctgaacgacatagttgtagttttttagttgaaatcgaaggcttgtttaaactgactttcc…	GACATTAAATGGAAGGCAAACA	TGAGCCATTTCGTTTGTTTCT	TTCTTCTCCGAAAACCTTACG	0.5245	1.9795	0.881	0.595346	2.24688
dd_Smed_v6_11561_0_1	FYN2	TK	Smed23374_V2 tyrosine kinase-2	Homo sapiens	FYN proto-oncogene, Src family tyrosine kinase	0	TYROSINE-PROTEIN KINASE	2.6e-272	attaagacaatttttcaagaaattcaaacttattgatgggcaactgcattgggaagtacaatttatgcaaaaaagctgaagattatgaattcgaaacaacgaaaatccctctagctccactacaatccggtctcgaaaacacatcgacaatctctacaaattctcttcagaatcacgttgttgatttgaaattgtcgaaattgattcagaattcttcatcagaaacgataggattaaaatcgccgtcgaattcattttctaaacctactgccaatcgcgacaatggaactttaagcccatcaaaatcatctccagcaaacattaaacatttgacgaattcgttaagtcgatcaaatcaaactcagcaagaatctctcgaatcgaatcagctggcgatta…	CTTATTGATGGGCAACTGCAT	GGCACGTAGCCTCTGATTTT	CGAAAATCCCTCTAGCTCCA	7.8985	17.49	15.216	0.519092	1.14945
dd_Smed_v6_10115_0_1	TK1b	TK	NA	Drosophila melanogaster	Activated Cdc42 kinase-like	5e-74	TYROSINE-PROTEIN KINASE	2.8e-57	aaaaattaattcattattttctttatattttaaaaaaggataatattactttgatatcctatattatagattttacaatcaaattatgctcacagacaataattcgagctcgtttagaaatggatacgaatttaataataatggatcggtttcaagcaacagtactggaatggataacttgctggaatttctcaaagaagcccagctggatcattattttgatgagttaaatctaaaattaaaaattcgttttactgcccaactgaaatatgttgacgaaattgaccttttatccatcggcatgacccgtccagaaatgaggcgtctgaaaaaatatttcgaaaaagaatttccacaaacagccatgggaaaaataaaaaagaaactatctagaagtac…	GCTCTTTGGGATCAGTCTTGA	TGCATTCAAAGTGGAAGTCG	AAGCGTATCATTCACGGTCA	11.1105	14.378	15.352	0.723717	0.936555
dd_Smed_v6_6799_0_2	NTRK2b	RTK	NA	Mus musculus	neurotrophic tyrosine kinase, receptor, type 2	2e-30	TYROSINE-PROTEIN KINASE RECEPTOR	4.4e-56	atttgttttaattaattaaaaacaaattgttcttatcaatttaaagggctgaaattataaaatgtaacatttttaaaactgattgtttgttagttgaatacatacagtgttgaatacataacgaaggaagaacaccaacaaatatttgatggacacaacaatttggattcttgaaaactcttatgttttggaaacttggttttcacaaacaaattcagtaacagttgccgaaaaatactgtatgtatatggctagatataaaggcaaaagggatgttgtggttgactgcgttgatgaaactataatatttaactcgtcaattcacaacttaatatggcaacgctatggtcaagtatatgaaaataaatacccatatacttatttaaataacggttcttt…	TATGGCAACGCTATGGTCAA	TTTCAAAATGAGCGGCATTA	AACCCTTATCCATAGATGTGCAA	4.168	4.91	5.552	0.75072	0.884366
dd_Smed_v6_8408_0_1	GPR158	GPCR	NA	Drosophila melanogaster	poor gastrulation	8e-70	G-PROTEIN COUPLED RECEPTOR 158-RELATED	1e-129	ttcttcactctatttctctgtctcgggaaaaattgatttctgcgactggatgaaattcattttttaggttaggaaaaaaataccactttacagagagaagactttctcttggattcagtcagttgggggaactatgaaaaagaaacagactaacattgaagaattgctgatcaattcacaacgctgattcgtatctatatatatatatattttttaatatacacttatcgatagttatataatatttgaaattatcaattcttgaaatggatttatctgaaaatgtctatggatggaaaattgatcaatgaatgtgttattgattgaaacacttgctttcgttttgatcatcctctcaacaccgcgggtttccaaatcgacaaacgactccaatttgta…	AATCAACGGAAATCCACGAG	GAATACTTTTGGCCCGATGA	AATCAAATCGCGCCTCAAT	8.242	10.0935	13.4	0.615075	0.753246
dd_Smed_v6_10115_0_1	TK1a	TK	NA	Drosophila melanogaster	Activated Cdc42 kinase-like	5e-74	TYROSINE-PROTEIN KINASE	2.8e-57	aaaaattaattcattattttctttatattttaaaaaaggataatattactttgatatcctatattatagattttacaatcaaattatgctcacagacaataattcgagctcgtttagaaatggatacgaatttaataataatggatcggtttcaagcaacagtactggaatggataacttgctggaatttctcaaagaagcccagctggatcattattttgatgagttaaatctaaaattaaaaattcgttttactgcccaactgaaatatgttgacgaaattgaccttttatccatcggcatgacccgtccagaaatgaggcgtctgaaaaaatatttcgaaaaagaatttccacaaacagccatgggaaaaataaaaaagaaactatctagaagtac…	TTCGGATATCTGGGCTTTTG	CAGTGGAGATGGGATGGTTT	GGTTTTGCTGTGGGAAATGT	11.1105	14.378	15.352	0.723717	0.936555
dd_Smed_v6_3349_0_1	FER	TK	NA	Homo sapiens	fer (fps/fes related) tyrosine kinase	1e-50	TYROSINE-PROTEIN KINASE	1.6e-86	aaaaagccatattcaaattgttatcagagaatccaaacgtattgtcggtgtttcataaagaggaagtcgccaaaaagtttatctcatttatatcaaatactcatctaaataataaaaaaaatcttggggtcagtgaaggaacttggcttatggtggctagtgttggaaatactaaatcgcctttattaaagtggtattttaattcccgttcagttgaaagaaatctaacaggactgattaaagtaccaattacacagattattggttcagagtttaacaataaaatatggtatgcaaaatatggttttcgacctcctggtgatggttcagtaaaatctgtggtttctgaatgtgtttttggatttaatgttatacttgggttgtcgtgttgggccacag…	GTTCTTGTCGGAAGCAAAGC	CGAATGATCGCAAATCAATG	TCCTTGAATCCCAACAATGA	38.6205	60.271	53.9435	0.715944	1.1173
dd_Smed_v6_9416_0_2	FYN3	TK	Smed07433_V2 tyrosine kinase-1	Homo sapiens	FYN proto-oncogene, Src family tyrosine kinase	2e-173	TYROSINE-PROTEIN KINASE	6e-247	tataaattagaatttttgaattaaaaatgtattcgacagatttatttttgtgacaaaatgggtaattgtgttgataaattagaaaatggctccttaagagataacaaatatttaccaaatcagaaagaaaatatcgataaagatgattataagttttcaaatgaaaattctaatcaaactcaatcatatccgtctactccacatatgactaaagctaatttttgcaaattccaatgtctctaaactaacgaattctcaagagggttctcacatgtcagttaaaatttcagagtcttgtactacttttataaataattctggtgaaaatatcttacctcgtttgtctgattgttcagatcgtaattggaatgttagatcagattctccaagtaggcacag…	TAGTCGAACAACGAGCAACG	CGGACCAGATAAGGCAACAT	GGAGTGGTATTTCCCGTTCA	5.699	8.4365	8.0625	0.706853	1.04639
dd_Smed_v6_7454_0_1	LPHN3	GPCR	NA	Aplysia californica	latrophilin-3-like	2e-31	G-PROTEIN COUPLED RECEPTOR	1.8e-44	tatatgaaaggcatttgaaactaatatcttagatattttatcataaatcaattttgatttttttaagatcattaaacactatgaaaccatttatttattggatttatttattttctgtgagcattattggttataggtttactgtcactccgactgtagtaaaaaactttaatatcacattcgataagtcattttatttggaaaaaatgaataaagaaatgaatgagaagtgcttcgcaatctgcagcaacaatgcaacaagtacaattgttgttcaaatcattacggataatgtgacaaaaataaatattccagtaattgaagacatcactgcaattgtctactacaaatgcgctaatcagctcacaaaaggtggtcccggaaagtctgagtattata…	TGTACAACGGAACGCATGAT	TACAGCCAGATTTGCGATTG	CTGGAAAGGATGCCAATTTC	18.4765	22.3955	26.7805	0.689924	0.836261
dd_Smed_v6_2017_0_1	ITGB1	integrin	Smed-beta1-int	Homo sapiens	integrin, beta 1 (fibronectin receptor, beta polypeptide, antigen CD29 includes MDF2, MSK12)	2e-116	INTEGRIN BETA SUBUNIT	1.1e-257	aatctatataaatcttatatggcattgctaaaatgaatgtttttttcgtttttttgatatcgttttctctgatctccttggcggtttctaatcctgatgaggaatgttcgaaagctacaaattgtcaatcttgcatggaaaaatctcctagctgtggctggtgttttgatgcggcatttgaagaccgtaatgttggccctggatttagatgtgggtctataaaagttttaatggaaagaggttgtcagaaatcactaattgaatttatgaaatcgtcaattaaaagtcaaagtaatcgcattaaaagacaatcagacgatgatgaaattcagcttaaaccattaactcaatcagcttcaattcgaccaggcctgccgctggacattgaactgacctata…	CGGCATTTGAAGACCGTAAT	ATCTCGACAGGGAACAATGG	CGCATTAAAAGACAATCAGACG	37.5995	77.346	83.711	0.449158	0.923965
dd_Smed_v6_3365_0_1	ITGA5	integrin	Smed-alpha-int2	Eptesicus fuscus	integrin, alpha 5 (fibronectin receptor, alpha polypeptide)	2e-12	INTEGRIN ALPHA	4.5e-34	cgtcatcgtttacaaacatcgttatgactcattaggttaagttaaatgtaattttaacatacatttcagcatgtgcatttttgaaatatgaaatctttgtgaaattttggattttctgtaatgtttcagctgttacttttctattttctagcgaacggagtattaaccgatcagattaagaattggattcccaattatgaaaacgaaaataccttcaatgaaccttatgattttgtcgatgataaatttctaccaaattttcaaaatttcggaagtggttatgactggatcagtattgctggatcgtctataataaatcaaaagcaagctcatatagcttttacaggcacaagaaataacaacgtctcaaattataattctgtttatacaaaacaatct…	AGTTAATGTGGGTGCCGTGT	TCAACATTTCCTTTGCGACA	TATTGCCCGTCTAGGGGATA	29.873	55.1935	44.3615	0.673399	1.24418
dd_Smed_v6_8571_0_1	ABL1	TK	NA	Homo sapiens	ABL proto-oncogene 1, non-receptor tyrosine kinase	5e-171	TYROSINE-PROTEIN KINASE	3.2e-214	gtttgtttaattatttccaatttatgaatttttatattataaacttctattatatttcaaagtatttattatgggcaaccaacaacctaaagataaaactttaagtactgctaataattctagtgaagaaatagttaataatgagttattttcttcgaataaagaccacatagatattaaatctgatttatggagaagtgataatttactaagtgagaagaataacctaagttcttttacttctacagaagttaaacaaacttatactgttgctcaaagtgatttttcacaaacacaatcacaatctccaatatcagttaaaaaaggagaaaaactaaaatttaaaggatatagtccagatagacaatgggttattatagaaaagcttgattcatcaga…	TCGTCGTTTGCGATCAATTA	GCAAGTTCTTTGGGGATCAA	ATGGTTTGCCATGTCAGCTA	10.21	11.575	15.594	0.654739	0.742273
dd_Smed_v6_11488_0_1	ALSTR	GPCR	NA	Ixodes scapularis	allatostatin receptor, putative	3e-08	G-PROTEIN COUPLED RECEPTOR-RELATED	8.6e-14	ttatgtttttgttacaatcgaaattaataattattaccagaatccatggaagcctatcgagtaattcaactgatggacaacatctatcgagcatttatggcacctgttgcagcagtcattggaattttcggaaattcgatcatcctttttttgtttattcgaatgaaaataagaagatttgagtattattgtgtgattttagccatttcaaatttgttcgctgttatttttaatacgcttcttgacgactttttaggaagaggcatggaatatttaaccagcggtgcttggtcttttaagccaaatttgtggtcgaataattcttgtagacttcttgaattttttccaacgatgatgtacttttgttctgcttatgtgctggttgtatttactcttgat…	CCAGAATCCATGGAAGCCTA	TTTCGTTCGAATCGGTTTCT	ATCGAGCATTTATGGCACCT	3.3295	10.1155	5.221	0.637713	1.93746
dd_Smed_v6_13356_0_1	FZD4	FZD	Smed-fzd-4-3	Homo sapiens	frizzled class receptor 4	2e-94	FRIZZLED	3.6e-133	gaccgtttgaatatcaaatttagcagataaaaatgattaaattgccaccagtgaatatttgtttatttttactgatttccatagtagattcaattgaaaatgaaaaatgtaaaccaaaaccaattgcaattggacagtgtcaaaataaattctataattttacaagtttaagtcaagatcaagaggcagaagttcaaattcctattgaaacttatcgttccctgttatcaaatggctgctcaaagcatttgaattttctactttgttcagtctatgttccgttctgtgattacgatactggtatccaacttgaaccatgtcggaaagtctgtgaaaaagtccaattcgattgtgaaccgatattgaagctagtcaacctttcatggccagaaaaattga…	CCATGTCGGAAAGTCTGTGA	AATGAAATTCGAACGGCTTG	ATCCAAGCCAGGAGGAGAAT	7.3555	18.5255	13.5665	0.542181	1.36553
dd_Smed_v6_12571_0_1	DDR	RTK	NA	Drosophila melanogaster	Discoidin domain receptor	3e-33	TYROSINE-PROTEIN KINASE RECEPTOR	1.2e-72	cgttcacaaacatgaatataatcattattattattgctggtgtaagacaatttacagtggagttacaaatgtttcgtttgtagtagcaaataagagttcgaatcaaatctctcgattttcattggttgaaatgttgtcattgtaatattcgatgtagcacgtgttagcagcatttcattttcgttctactgaatttgatttatttggagaaatttatttccgttatagtttaattttctaacagaaacaataattcggtttttaaaagaattaacttttctatgtctctattcggattttggattttatttttcatcgtaatttacaattgtctaatttctgcagtgaaagcttttcaagaaagtgtgagatttagtgacaatgaaacgaactgcatca…	ATTACACGCAGCCAAACTCC	ATCAGCAAATTTCGGTCTGG	CGGATCACAACCAAGTGATG	1.4925	3.0455	2.4525	0.608563	1.24179
dd_Smed_v6_5048_0_1	TK2	TK	NA	novel	novel	novel	TYROSINE-PROTEIN KINASE	5.7e-16	ctatataaatcttatatgatgtcaaatcaagtgttggaaatctaaactaaaaatgggggaaatttatgaatttgatagtcagcatcaaattgatccaaaattgcttttggatgatgaaatcaaaaagcaaatggacttattaaaatattcaatgtggtatcatggaattattggccgaattgaagctgaaagtcgaatttttaacaatggagaatttttagtgcgattttccgaagataaaaccaacaaattcgtcgtatcgtctaaatggaatgggaaatttatccacataatcattctcaccgacatcgataacaacaaaaagtgcttggtgtatttcataaacccgaaattcaaattcccaacggttcaccagttaatatcattccacaaggaaaa…	ATCTCCACCAGAACGATTGC	GCCTTCATTGCACCTCCTAA	AAATCCGCAACAAAAAGCTC	16.686	69.3815	30.4595	0.547809	2.27783
dd_Smed_v6_3147_0_1	SRC2	SRC	NA	Aplysia californica	Src tyrosine kinase 1	1e-168	TYROSINE-PROTEIN KINASE	1.3e-196	tttaaaactaatttataagtttttactataaacataataaattaaatttggaaataaactttaagtttgagtgaaagttaaataagaaatatttgtttattaaataaatgaaaaactttcataattatttttgaaagatgggtaactgcttgtcaattgaaaacaaccagaaacaacaatatccaaaaccaagtaacagagaaaaaagttataattttgaagtaactaatatttcccaaaataattctgaaacacaacaaatgattctttctcctcctttacaacaacaaatgattccttcatctccaatacctccagtcatgtataatcagagaccaactgttagagcattattttcttacgaagctcgtcacacagatgatttggaatttagtaaag…	TCGTCACACAGATGATTTGGA	TGCGATCAACCAATGAAAAA	AAGCTTGGTGGCTTGCTTTA	24.661	58.997	45.0665	0.547214	1.30911
dd_Smed_v6_7218_0_1	novel2	other	NA	novel	novel	novel	novel	novel	aaaacgcaattttgaaggtcaagtgtgttttataattgttagctattaattttgtttctaattattcaacaataattttcaaaaaaaaatgaacaattaacaaaatggacactgatacagcattacttgacaaattaccgttccttgatgaggctttatcactacctaaatctgaatttaacaaaatagcaaaagcgtttattaattactccgcttattgtgattattttcttttaccggataaagttgatgattggtgtaaaaaattaggatgccaaaatgatgtttgtacatatttatttgatgatgcctctgttacaaatgcagtaattactacaactccgaaggttgcagctcttgcaaaacattgttatgatattttcttctgttctccatcat…	CAAAATGGACACTGATACAGCA	ATGGTGGACAACAATGCAAA	CGGATAAAGTTGATGATTGGTG	9.3065	9.0535	18.608	0.500134	0.486538
dd_Smed_v6_7911_0_1	ROR	RTK	NA	Homo sapiens	receptor tyrosine kinase-like orphan receptor 1	2e-134	TYROSINE-PROTEIN KINASE RECEPTOR	7.2e-185	ttgtatttcaactagtcagattaactgaccaatgaaaatcaattattcatattgcatactagcacaaatgaaatttgtatcgagtcagccgaaagccgactggtagatgtgtacaattctgcacccgtacacaagatggtatttgattctcgatttctctctggcaattattgtttctcaaattggttctaaattttattatttttaattcttcgaattttttcaagattcagaataaataaattccagatatcaaaattatgctgaaatgttcgaagaaattgctgataattatcgtatatatggttttcctcaatcagccaatctccggtttcactgccaaagatattaaacaaacagattctaaacagcctcctcaattcgaaggctacattaaat…	GAGCCTACCCAACAACAGGA	AACCTGGAGAAGTGCATTGG	TGCTCCTTGGTGTTTTACGA	10.614	19.8215	32.765	0.323943	0.60496
dd_Smed_v6_3773_0_1	DYRK1B	STK/TK	NA	Homo sapiens	dual-specificity tyrosine-(Y)-phosphorylation regulated kinase 1B	1e-145	DUAL SPECIFICITY PROTEIN KINASE	2.1e-210	aatctatataaatcttatatgggtaatcagtggttatttttgatataatcgaagatttatcaatgattatctattattcttttacaaaaataattttcatttgattgaagaatccgtgtacaaatgaggtaaatgtttatctgttgctgttattgttttgaatgattaacaagttaatatcaaaagaaattattcatgatataaataagataaaccgaaataacgagttgttagataaattcgtatattctgaaatggaagatcaaaataaaactgtgaaaactcaaaatagtcggtacggtcatttagtgaccatggatcaattaaatttctccaaatccaatcaaaatgacacagttaactcttgcaagttaaatttctttccatattcagacggag…	CAAGCCTTCATTACGCATCA	TCGCTCGGTTATCAACATGA	TCAATCCAAAAAGATCGGCTA	17.1205	17.723	64.6025	0.265013	0.274339
dd_Smed_v6_6719_0_1	PLCG1	other signaling	NA	Anolis carolinensis	phospholipase C, gamma 1	1e-117	PHOSPHOINOSITIDE-SPECIFIC PHOSPHOLIPASE C FAMILY P	7.4e-152	aaataattgaaaggattttcaaatgaaaatttcagattttaaagctgagatttgaaatattataagttgattgtggggaattttatttttattttcgagttatttttaaaccaagttaaaggcatctatttattaatgaatggactttttgtgtcaatttgaatactaatccaacatgaacgatagcattttaagatcgattgaaaagggaacatttatgataaaggaaacgaagaagcgaagtgaagaaatttacgttcgaattcggctagaaagtaaacaaatcgtaaaggtgaataaagctaaagaaggcagcaaaaggagtatgaaagaagatgaagtagttatcgtggatatagcccatattatcgatatcaggaacagcgatgacgacagcat…	TGCATTGGATTTCACGATTC	AAGTGTCGAGCTCCGAGAAA	CCTCCAGAACGATTCCAAGA	13.322	6.5455	25.721	0.517943	0.254481
dd_Smed_v6_6039_0_1	CSK	TK	NA	Homo sapiens	c-src tyrosine kinase	8e-115	TYROSINE-PROTEIN KINASE	2e-170	tctatataaatcttatatgttcttctacaaaagagtttttgttacatatgccactgaaaccaggtgattttttaactgcattatataactttgaaggccaaaaggctgaagatttacctttttcgaaaggggaaaagttgaaagtcttgaaaataatatcggatccgaactggataacatgctctaataataagcaacaccaaggcttggtcccagtcaatcatgttaaattatcgccatctttaaatattgaagatccatggtatcatggaaaagtttcccggtctctcgcagaagagcgtctgatgccatgcgaaaatggcacattcctaattagatcttccgataaatttcctggagactacactatttgtgtaaaattcaacgatgtccagtttt…	GCTTGGTCCCAGTCAATCAT	AAAGTTTTCGCGCAAATGAA	ATGGAAAAGTTTCCCGGTCT	13.9755	22.347	39.2715	0.355869	0.569039
dd_Smed_v6_4352_0_1	ABL1b	TK	NA	Apis mellifera	tyrosine-protein kinase Abl-like	0	TYROSINE-PROTEIN KINASE	8.6e-223	agcactagtgaaaccttgaatatcaaatggagaattaataaatatttcattagaatatgggttctattcagactaaacagtcagctagcaatagcagtatttctaaaaataataaagaagataatgtggataaaacatcacaaagttcagaatcgctgttattagttgctttgtatgattttaatgctaccatggaatcccaattatcaattaaaaaaggtgattgcctaaaattgattagttacaatcacattggagattggtcagaggtagaaagttttacatcacataatcgtggttgggtcccaacaaactacattgctagactgaatcctataattaaccaaaataatatcaagaataaaccagctaatgattcccagctaatggcataccaat…	GCGGTCAATATGGTGATGTG	GAGGATCCGTCGTCTTTGAA	TGAAGCCGTATGGAAACGAT	14.084	33.3355	33.0485	0.426162	1.00868
