# Supplementary material for: tec-1 kinase negatively regulates regenerative neurogenesis in planarians
Source: eLife. 2020 Jan 20;9:e47293. doi: 10.7554/eLife.47293 (PMC6970515; doi:10.7554/eLife.47293)
Supplement: Supplementary file 2. — Table describes the measurement of cto cell abundance after inhibition of each gene. Genes are described by their ddv6 contig identifier from Planmine and with a provisional name. Data from analysis of head, trunks, and tail fragments were pooled to obtain an average value of cto cell number normalized to animal area and standard deviations calculated. Log2-normalized values of (average cto cells/area) are additionally presented. Unadjusted and Benjamini-Hochberg-adjusted p-values are shown from t-tests to compare cto/area measurements between each indicated RNAi condition and control RNAi treatment (C. elegans unc-22, ‘ctrl’). [file elife-47293-supp2.xlsx]

## Sheet: Sheet1
ddv6 ID	gene name	average log2FC cintillo normalized to square root of area	average cintillo normalized to square root of area	standard error cintillo normalized to square root area	t-test(p.value)	t.test(p.adj)
dd_Smed_v6_4818_0_1	TEC1	0.612181	0.0906628	0.00470182	5.44996e-05	0.00101733
dd_Smed_v6_11285_0_1	NDK	0.533892	0.0857403	0.00367444	0.000170779	0.00239091
dd_Smed_v6_7911_0_1	ROR	0.247314	0.070813	0.00384171	0.0459099	0.197766
dd_Smed_v6_13356_0_1	FZD4	0.211952	0.089451	0.0344326	0.419817	0.635398
dd_Smed_v6_3147_0_1	SRC2	0.193658	0.068198	0.00445249	0.14853	0.378076
dd_Smed_v6_6020_0_1	TK2	0.152551	0.0657792	0.00189062	0.142261	0.378076
dd_Smed_v6_6039_0_1	CSK	0.150359	0.0628109	0.00276219	0.499341	0.676008
dd_Smed_v6_6799_0_2	NTRK2a	0.145464	0.0643841	0.00224416	0.273118	0.566466
dd_Smed_v6_5048_0_1	TK2	0.113104	0.067694	0.00849114	0.410344	0.635398
dd_Smed_v6_11488_0_1	ALSTR	0.10747	0.0627367	0.00213525	0.470936	0.676008
dd_Smed_v6_8973_0_1	LRTK	0.102945	0.0627746	0.00164533	0.439566	0.647782
dd_Smed_v6_8643_0_1	GPCR3	0.0783941	0.0619378	0.00207082	0.596775	0.742653
dd_Smed_v6_16928_0_1	EPHA2	0.0694436	0.0623234	0.00303047	0.585119	0.742653
dd_Smed_v6_9075_0_4	SYK	0.0383616	0.0610949	0.00341602	0.794034	0.882771
dd_Smed_v6_17134_0_1	NPFFR1	0.0383063	0.0615833	0.00566254	0.793796	0.882771
dd_Smed_v6_4352_0_1	ABL1b	0.0359727	0.0602236	0.00229167	0.925241	0.942063
dd_Smed_v6_5170_0_1	XPR1	0.0312609	0.0595737	0.00172872	0.943105	0.943105
dd_Smed_v6_13016_0_1	PLXNB2	0.023913	0.0614514	0.00529374	0.79944	0.882771
dd_Smed_v6_2017_0_1	ITGB1	0.0133196	0.0605164	0.00360498	0.891741	0.929319
dd_Smed_v6_10020_0_1	NPFR1	0.00835576	0.0606229	0.00487656	0.896129	0.929319
dd_Smed_v6_5823_0_4	GPCR2	0.00700233	0.0611086	0.00514506	0.837963	0.902422
unc22	ctrl	-0.00309917	0.059843	0.00325622	NA	NA
dd_Smed_v6_3365_0_1	ITGA5	-0.00512298	0.0569083	0.00415197	0.588468	0.742653
dd_Smed_v6_6719_0_1	PLCG1	-0.0428549	0.0585864	0.00318873	0.787122	0.882771
dd_Smed_v6_7218_0_1	novel2	-0.0445095	0.0567425	0.00316884	0.507006	0.676008
dd_Smed_v6_12571_0_1	DDR	-0.0533465	0.0564529	0.00198575	0.391902	0.635398
dd_Smed_v6_17433_0_1	GPCR5	-0.0542283	0.0558001	0.00207812	0.315735	0.605358
dd_Smed_v6_9474_0_1	SMO	-0.0603723	0.0562713	0.00202242	0.369412	0.626881
dd_Smed_v6_11934_0_1	PLXN1a	-0.0635708	0.0583292	0.0049978	0.803952	0.882771
dd_Smed_v6_9416_0_2	FYN3	-0.0762564	0.0559596	0.00233879	0.349686	0.61195
dd_Smed_v6_7454_0_1	LPHN3	-0.0824639	0.0560928	0.00410721	0.48405	0.676008
dd_Smed_v6_10115_0_1	TK1a	-0.102593	0.0556171	0.00253633	0.324299	0.605358
dd_Smed_v6_5979_0_1	TMEM181	-0.102631	0.0548566	0.0024392	0.240274	0.517513
dd_Smed_v6_7897_0_3	FGFR1	-0.103445	0.0551544	0.00351862	0.343593	0.61195
dd_Smed_v6_7988_0_1	DDR2b	-0.109015	0.053897	0.00257072	0.174118	0.406276
dd_Smed_v6_10115_0_1	TK1b	-0.116042	0.0552203	0.00270568	0.293918	0.587835
dd_Smed_v6_8408_0_1	GPR158	-0.118962	0.0539636	0.00161652	0.135519	0.378076
dd_Smed_v6_8571_0_1	ABL1	-0.125301	0.0540313	0.00208455	0.157734	0.384047
dd_Smed_v6_1574_4_2	GPR107	-0.145235	0.0562769	0.00680271	0.653404	0.795448
dd_Smed_v6_7733_0_1	CALCR	-0.194789	0.0510194	0.00447654	0.142829	0.378076
dd_Smed_v6_9911_0_2	JKAMP	-0.194795	0.0519261	0.0046931	0.193243	0.432863
dd_Smed_v6_3363_0_1	HCK	-0.216645	0.0509314	0.002841	0.0586162	0.234465
dd_Smed_v6_11561_0_1	FYN2	-0.219266	0.0519554	0.00393725	0.145715	0.378076
dd_Smed_v6_2366_0_1	SHARK	-0.24257	0.0496368	0.0024813	0.0256573	0.130619
dd_Smed_v6_5900_0_1	ITFG2	-0.245892	0.0514672	0.00435899	0.145503	0.378076
dd_Smed_v6_3773_0_1	DYRK1B	-0.296487	0.0478378	0.0020566	0.00888187	0.0621731
dd_Smed_v6_6272_0_1	SRC1	-0.316563	0.048041	0.00230707	0.0114287	0.0640005
dd_Smed_v6_5635_0_1	FYN1	-0.487156	0.0422735	0.00214088	0.000622838	0.00581315
dd_Smed_v6_9006_0_2	IGF1R2	-0.499435	0.0429561	0.00453915	0.010027	0.0623902
dd_Smed_v6_9381_0_1	RYAR	-0.6045	0.04855	0.0061848	0.127418	0.378076
dd_Smed_v6_6633_0_1	ILGF1Ra	-0.778098	0.0366306	0.00433608	0.000516893	0.0057892
dd_Smed_v6_6799_0_2	NTRK2b	-0.950733	0.0518843	0.00874592	0.411351	0.635398
dd_Smed_v6_11934_0_1	PLXN1b	-1.33264	0.0413208	0.010037	0.110827	0.378076
dd_Smed_v6_8641_0_1	ERBB4	-1.47171	0.0338647	0.00830805	0.0314604	0.146815
dd_Smed_v6_6633_0_1	ILGF1Rb	-1.54222	0.0215996	0.0028936	3.48436e-07	1.66099e-05
dd_Smed_v6_6480_0_1	GPRK1	-2.04707	0.031123	0.0075364	0.0050979	0.0407832
dd_Smed_v6_3349_0_1	FER	-2.25748	0.0173587	0.0045856	5.93212e-07	1.66099e-05
