# Supplementary material for: tec-1 kinase negatively regulates regenerative neurogenesis in planarians
Source: eLife. 2020 Jan 20;9:e47293. doi: 10.7554/eLife.47293 (PMC6970515; doi:10.7554/eLife.47293)
Supplement: Supplementary file 3. — Each subpanel or plot is indicated by the name of the corresponding tab in the file. Data of cell counts or normalized cell counts across specimens is indicated. [file elife-47293-supp3.xlsx]

## Sheet: Fig. 1B RNAi screen
animal	ddv6 contig for constructing dsRNA	blastx.species	blastx.target	blastx.evalue	panther	gene name	category of molecule	animal replicate	fragment type	# cto cells	area (pixels)	cto/(square root of area)	normalized log2 (cto/square root area)
1	unc22	NA	NA	NA	NA	ctrl	control	1	Tks,Tls	40	464833	0.0586694	0.060325
2	unc22	NA	NA	NA	NA	ctrl	control	2	Tks,Tls	49	766956	0.0559514	-0.00810887
3	unc22	NA	NA	NA	NA	ctrl	control	3	Tks,Tls	34	489230	0.0486096	-0.21104
4	unc22	NA	NA	NA	NA	ctrl	control	4	Tks,Tls	25	289014	0.046503	-0.27496
5	dd_Smed_v6_11285_0_1	NA	NA	NA	NA	NDK	control	1	Tks,Tls	60	448486	0.0895936	0.671112
6	dd_Smed_v6_11285_0_1	NA	NA	NA	NA	NDK	control	2	Tks,Tls	53	528945	0.0728737	0.373115
7	dd_Smed_v6_11285_0_1	NA	NA	NA	NA	NDK	control	3	Tks,Tls	42	186308	0.0973046	0.790226
8	dd_Smed_v6_11285_0_1	NA	NA	NA	NA	NDK	control	4	Tks,Tls	53	318805	0.0938671	0.738337
9	dd_Smed_v6_6020_0_1	Drosophila mojavensis	GI23882 gene product from transcript GI23882-RA	4e-53	TYROSINE-PROTEIN KINASE	TK2	TK	1	Tks,Tls	53	868575	0.0568686	0.0153484
10	dd_Smed_v6_6020_0_1	Drosophila mojavensis	GI23882 gene product from transcript GI23882-RA	4e-53	TYROSINE-PROTEIN KINASE	TK2	TK	2	Tks,Tls	44	430193	0.0670843	0.253693
11	dd_Smed_v6_6020_0_1	Drosophila mojavensis	GI23882 gene product from transcript GI23882-RA	4e-53	TYROSINE-PROTEIN KINASE	TK2	TK	3	Tks,Tls	38	390979	0.0607725	0.111135
12	dd_Smed_v6_6020_0_1	Drosophila mojavensis	GI23882 gene product from transcript GI23882-RA	4e-53	TYROSINE-PROTEIN KINASE	TK2	TK	4	Tks,Tls	33	221638	0.0700958	0.317045
13	dd_Smed_v6_6020_0_1	Drosophila mojavensis	GI23882 gene product from transcript GI23882-RA	4e-53	TYROSINE-PROTEIN KINASE	TK2	TK	5	Tks,Tls	30	244021	0.0607306	0.110141
14	dd_Smed_v6_17134_0_1	Aplysia californica	neuropeptide FF receptor 1-like	4e-09	G-PROTEIN COUPLED RECEPTOR-RELATED	NPFFR1	GPCR	1	Tks,Tls	43	477680	0.0622157	0.144996
15	dd_Smed_v6_17134_0_1	Aplysia californica	neuropeptide FF receptor 1-like	4e-09	G-PROTEIN COUPLED RECEPTOR-RELATED	NPFFR1	GPCR	2	Tks,Tls	51	558307	0.0682549	0.278649
16	dd_Smed_v6_17134_0_1	Aplysia californica	neuropeptide FF receptor 1-like	4e-09	G-PROTEIN COUPLED RECEPTOR-RELATED	NPFFR1	GPCR	3	Tks,Tls	56	694920	0.067177	0.255685
17	dd_Smed_v6_17134_0_1	Aplysia californica	neuropeptide FF receptor 1-like	4e-09	G-PROTEIN COUPLED RECEPTOR-RELATED	NPFFR1	GPCR	4	Tks,Tls	34	402449	0.0535949	-0.070187
18	dd_Smed_v6_17134_0_1	Aplysia californica	neuropeptide FF receptor 1-like	4e-09	G-PROTEIN COUPLED RECEPTOR-RELATED	NPFFR1	GPCR	5	Tks,Tls	34	342569	0.0580905	0.0460187
19	dd_Smed_v6_17134_0_1	Aplysia californica	neuropeptide FF receptor 1-like	4e-09	G-PROTEIN COUPLED RECEPTOR-RELATED	NPFFR1	GPCR	6	Tks,Tls	68	408370	0.10641	0.919278
20	dd_Smed_v6_17134_0_1	Aplysia californica	neuropeptide FF receptor 1-like	4e-09	G-PROTEIN COUPLED RECEPTOR-RELATED	NPFFR1	GPCR	7	Tks,Tls	34	324581	0.0596784	0.0849268
21	dd_Smed_v6_8973_0_1	Homo sapiens	leukocyte receptor tyrosine kinase	5e-59	UNCHARACTERIZED	LRTK	RTK	1	Tks,Tls	46	486214	0.0659696	0.229519
22	dd_Smed_v6_8973_0_1	Homo sapiens	leukocyte receptor tyrosine kinase	5e-59	UNCHARACTERIZED	LRTK	RTK	2	Tks,Tls	45	602690	0.057965	0.0428982
23	dd_Smed_v6_8973_0_1	Homo sapiens	leukocyte receptor tyrosine kinase	5e-59	UNCHARACTERIZED	LRTK	RTK	3	Tks,Tls	39	438158	0.0589182	0.0664298
24	dd_Smed_v6_8973_0_1	Homo sapiens	leukocyte receptor tyrosine kinase	5e-59	UNCHARACTERIZED	LRTK	RTK	4	Tks,Tls	48	460557	0.0707293	0.330026
25	dd_Smed_v6_8973_0_1	Homo sapiens	leukocyte receptor tyrosine kinase	5e-59	UNCHARACTERIZED	LRTK	RTK	5	Tks,Tls	35	279205	0.0662379	0.235374
26	dd_Smed_v6_8973_0_1	Homo sapiens	leukocyte receptor tyrosine kinase	5e-59	UNCHARACTERIZED	LRTK	RTK	6	Tks,Tls	30	246434	0.0604326	0.103043
27	dd_Smed_v6_9381_0_1	Drosophila melanogaster	RYamide receptor	8e-47	G-PROTEIN COUPLED RECEPTOR	RYAR	GPCR	1	Tks,Tls	38	576180	0.0500616	-0.168579
28	dd_Smed_v6_9381_0_1	Drosophila melanogaster	RYamide receptor	8e-47	G-PROTEIN COUPLED RECEPTOR	RYAR	GPCR	2	Tks,Tls	2	749984	0.00230943	-4.60668
29	dd_Smed_v6_9381_0_1	Drosophila melanogaster	RYamide receptor	8e-47	G-PROTEIN COUPLED RECEPTOR	RYAR	GPCR	3	Tks,Tls	17	379065	0.0276116	-1.02701
30	dd_Smed_v6_9381_0_1	Drosophila melanogaster	RYamide receptor	8e-47	G-PROTEIN COUPLED RECEPTOR	RYAR	GPCR	4	Tks,Tls	14	241305	0.0285	-0.981321
31	dd_Smed_v6_9381_0_1	Drosophila melanogaster	RYamide receptor	8e-47	G-PROTEIN COUPLED RECEPTOR	RYAR	GPCR	5	Tks,Tls	35	307736	0.0630927	0.16519
32	dd_Smed_v6_9381_0_1	Drosophila melanogaster	RYamide receptor	8e-47	G-PROTEIN COUPLED RECEPTOR	RYAR	GPCR	6	Tks,Tls	52	716447	0.0614344	0.126763
33	dd_Smed_v6_9381_0_1	Drosophila melanogaster	RYamide receptor	8e-47	G-PROTEIN COUPLED RECEPTOR	RYAR	GPCR	7	Tks,Tls	41	613715	0.052336	-0.104479
34	dd_Smed_v6_3363_0_1	Aplysia californica	Src tyrosine kinase 1	1e-153	TYROSINE-PROTEIN KINASE	HCK	TK	1	Tks,Tls	25	339656	0.0428964	-0.391428
35	dd_Smed_v6_3363_0_1	Aplysia californica	Src tyrosine kinase 1	1e-153	TYROSINE-PROTEIN KINASE	HCK	TK	2	Tks,Tls	30	339495	0.0514878	-0.128051
36	dd_Smed_v6_3363_0_1	Aplysia californica	Src tyrosine kinase 1	1e-153	TYROSINE-PROTEIN KINASE	HCK	TK	3	Tks,Tls	20	259598	0.0392536	-0.519458
37	dd_Smed_v6_3363_0_1	Aplysia californica	Src tyrosine kinase 1	1e-153	TYROSINE-PROTEIN KINASE	HCK	TK	4	Tks,Tls	25	209416	0.0546305	-0.0425765
38	dd_Smed_v6_3363_0_1	Aplysia californica	Src tyrosine kinase 1	1e-153	TYROSINE-PROTEIN KINASE	HCK	TK	5	Tks,Tls	23	225113	0.0484761	-0.21501
39	dd_Smed_v6_5170_0_1	Drosophila melanogaster	CG10483 gene product from transcript CG10483-RA	2e-159	XENOTROPIC AND POLYTROPIC RETROVIRUS RECEPTOR 1-RE	XPR1	signaling other	1	Tks,Tls	56	924203	0.0582511	0.0500032
40	dd_Smed_v6_5170_0_1	Drosophila melanogaster	CG10483 gene product from transcript CG10483-RA	2e-159	XENOTROPIC AND POLYTROPIC RETROVIRUS RECEPTOR 1-RE	XPR1	signaling other	2	Tks,Tls	39	410418	0.0608767	0.113608
41	dd_Smed_v6_5170_0_1	Drosophila melanogaster	CG10483 gene product from transcript CG10483-RA	2e-159	XENOTROPIC AND POLYTROPIC RETROVIRUS RECEPTOR 1-RE	XPR1	signaling other	3	Tks,Tls	45	492090	0.0641491	0.189145
42	dd_Smed_v6_5170_0_1	Drosophila melanogaster	CG10483 gene product from transcript CG10483-RA	2e-159	XENOTROPIC AND POLYTROPIC RETROVIRUS RECEPTOR 1-RE	XPR1	signaling other	4	Tks,Tls	30	311689	0.0537354	-0.0664098
43	dd_Smed_v6_5170_0_1	Drosophila melanogaster	CG10483 gene product from transcript CG10483-RA	2e-159	XENOTROPIC AND POLYTROPIC RETROVIRUS RECEPTOR 1-RE	XPR1	signaling other	5	Tks,Tls	29	288365	0.0540041	-0.0592138
44	dd_Smed_v6_5170_0_1	Drosophila melanogaster	CG10483 gene product from transcript CG10483-RA	2e-159	XENOTROPIC AND POLYTROPIC RETROVIRUS RECEPTOR 1-RE	XPR1	signaling other	6	Tks,Tls	25	187089	0.0577984	0.038747
45	dd_Smed_v6_5170_0_1	Drosophila melanogaster	CG10483 gene product from transcript CG10483-RA	2e-159	XENOTROPIC AND POLYTROPIC RETROVIRUS RECEPTOR 1-RE	XPR1	signaling other	7	Tks,Tls	33	340424	0.0565593	0.00748093
46	dd_Smed_v6_5900_0_1	Homo sapiens	integrin alpha FG-GAP repeat containing 2	4e-44	INTEGRIN ALPHA REPEAT DOMAIN-CONTAINING	ITFG2	integrin	1	Tks,Tls	42	534949	0.057424	0.0293699
47	dd_Smed_v6_5900_0_1	Homo sapiens	integrin alpha FG-GAP repeat containing 2	4e-44	INTEGRIN ALPHA REPEAT DOMAIN-CONTAINING	ITFG2	integrin	2	Tks,Tls	36	567991	0.0477674	-0.236256
48	dd_Smed_v6_5900_0_1	Homo sapiens	integrin alpha FG-GAP repeat containing 2	4e-44	INTEGRIN ALPHA REPEAT DOMAIN-CONTAINING	ITFG2	integrin	3	Tks,Tls	33	855876	0.0356704	-0.657554
49	dd_Smed_v6_5900_0_1	Homo sapiens	integrin alpha FG-GAP repeat containing 2	4e-44	INTEGRIN ALPHA REPEAT DOMAIN-CONTAINING	ITFG2	integrin	4	Tks,Tls	16	338765	0.0274897	-1.03339
50	dd_Smed_v6_5900_0_1	Homo sapiens	integrin alpha FG-GAP repeat containing 2	4e-44	INTEGRIN ALPHA REPEAT DOMAIN-CONTAINING	ITFG2	integrin	5	Tks,Tls	36	422832	0.0553629	-0.0233641
51	dd_Smed_v6_17433_0_1	NA	NA	NA	G-PROTEIN COUPLED RECEPTOR-RELATED	GPCR5	GPCR	1	Tks,Tls	40	766116	0.0456996	-0.3001
52	dd_Smed_v6_17433_0_1	NA	NA	NA	G-PROTEIN COUPLED RECEPTOR-RELATED	GPCR5	GPCR	2	Tks,Tls	36	525027	0.0496834	-0.179518
53	dd_Smed_v6_17433_0_1	NA	NA	NA	G-PROTEIN COUPLED RECEPTOR-RELATED	GPCR5	GPCR	3	Tks,Tls	37	550576	0.0498647	-0.174264
54	dd_Smed_v6_17433_0_1	NA	NA	NA	G-PROTEIN COUPLED RECEPTOR-RELATED	GPCR5	GPCR	4	Tks,Tls	43	557085	0.0576113	0.0340692
55	dd_Smed_v6_17433_0_1	NA	NA	NA	G-PROTEIN COUPLED RECEPTOR-RELATED	GPCR5	GPCR	5	Tks,Tls	30	235203	0.0618586	0.136691
56	dd_Smed_v6_17433_0_1	NA	NA	NA	G-PROTEIN COUPLED RECEPTOR-RELATED	GPCR5	GPCR	6	Tks,Tls	22	140501	0.0586925	0.0608946
57	dd_Smed_v6_17433_0_1	NA	NA	NA	G-PROTEIN COUPLED RECEPTOR-RELATED	GPCR5	GPCR	7	Tks,Tls	35	392216	0.0558863	-0.00978799
58	dd_Smed_v6_8643_0_1	Bombus impatiens	neuropeptides capa receptor-like	6e-10	G-PROTEIN COUPLED RECEPTOR-RELATED	GPCR3	GPCR	1	Tks,Tls	37	355701	0.0620382	0.140874
59	dd_Smed_v6_8643_0_1	Bombus impatiens	neuropeptides capa receptor-like	6e-10	G-PROTEIN COUPLED RECEPTOR-RELATED	GPCR3	GPCR	2	Tks,Tls	43	673540	0.0523946	-0.102864
60	dd_Smed_v6_8643_0_1	Bombus impatiens	neuropeptides capa receptor-like	6e-10	G-PROTEIN COUPLED RECEPTOR-RELATED	GPCR3	GPCR	3	Tks,Tls	39	632297	0.0490461	-0.198146
61	dd_Smed_v6_8643_0_1	Bombus impatiens	neuropeptides capa receptor-like	6e-10	G-PROTEIN COUPLED RECEPTOR-RELATED	GPCR3	GPCR	4	Tks,Tls	37	392776	0.0590377	0.0693532
62	dd_Smed_v6_8643_0_1	Bombus impatiens	neuropeptides capa receptor-like	6e-10	G-PROTEIN COUPLED RECEPTOR-RELATED	GPCR3	GPCR	5	Tks,Tls	39	418248	0.0603042	0.0999761
63	dd_Smed_v6_8643_0_1	Bombus impatiens	neuropeptides capa receptor-like	6e-10	G-PROTEIN COUPLED RECEPTOR-RELATED	GPCR3	GPCR	6	Tks,Tls	35	374992	0.0571554	0.0226063
64	dd_Smed_v6_8643_0_1	Bombus impatiens	neuropeptides capa receptor-like	6e-10	G-PROTEIN COUPLED RECEPTOR-RELATED	GPCR3	GPCR	7	Tks,Tls	28	228418	0.0585859	0.0582699
65	dd_Smed_v6_8643_0_1	Bombus impatiens	neuropeptides capa receptor-like	6e-10	G-PROTEIN COUPLED RECEPTOR-RELATED	GPCR3	GPCR	8	Tks,Tls	28	164805	0.068972	0.293728
66	dd_Smed_v6_9474_0_1	Drosophila melanogaster	smoothened	5e-16	FRIZZLED	SMO	GPCR	1	Tks,Tls	31	375914	0.0505612	-0.154252
67	dd_Smed_v6_9474_0_1	Drosophila melanogaster	smoothened	5e-16	FRIZZLED	SMO	GPCR	2	Tks,Tls	43	587935	0.0560795	-0.00481039
68	dd_Smed_v6_9474_0_1	Drosophila melanogaster	smoothened	5e-16	FRIZZLED	SMO	GPCR	3	Tks,Tls	45	765415	0.0514356	-0.129515
69	dd_Smed_v6_9474_0_1	Drosophila melanogaster	smoothened	5e-16	FRIZZLED	SMO	GPCR	4	Tks,Tls	36	493919	0.0512241	-0.135459
70	dd_Smed_v6_9474_0_1	Drosophila melanogaster	smoothened	5e-16	FRIZZLED	SMO	GPCR	5	Tks,Tls	33	360825	0.0549371	-0.0345023
71	dd_Smed_v6_9474_0_1	Drosophila melanogaster	smoothened	5e-16	FRIZZLED	SMO	GPCR	6	Tks,Tls	27	246019	0.0544352	-0.0477442
72	dd_Smed_v6_9474_0_1	Drosophila melanogaster	smoothened	5e-16	FRIZZLED	SMO	GPCR	7	Tks,Tls	27	318060	0.0478751	-0.233009
73	dd_Smed_v6_9474_0_1	Drosophila melanogaster	smoothened	5e-16	FRIZZLED	SMO	GPCR	8	Tks,Tls	27	255442	0.0534217	-0.0748572
74	dd_Smed_v6_6633_0_1	Mus musculus	insulin-like growth factor I receptor	1e-44	TYROSINE-PROTEIN KINASE	ILGF1Ra	RTK	1	Tks,Tls	44	591909	0.0571907	0.0234971
75	dd_Smed_v6_6633_0_1	Mus musculus	insulin-like growth factor I receptor	1e-44	TYROSINE-PROTEIN KINASE	ILGF1Ra	RTK	2	Tks,Tls	27	306413	0.0487764	-0.206098
76	dd_Smed_v6_6633_0_1	Mus musculus	insulin-like growth factor I receptor	1e-44	TYROSINE-PROTEIN KINASE	ILGF1Ra	RTK	3	Tks,Tls	43	550332	0.0579637	0.0428668
77	dd_Smed_v6_6633_0_1	Mus musculus	insulin-like growth factor I receptor	1e-44	TYROSINE-PROTEIN KINASE	ILGF1Ra	RTK	4	Tks,Tls	30	364463	0.0496929	-0.179242
78	dd_Smed_v6_6633_0_1	Mus musculus	insulin-like growth factor I receptor	1e-44	TYROSINE-PROTEIN KINASE	ILGF1Ra	RTK	5	Tks,Tls	8	147484	0.0208314	-1.43353
79	dd_Smed_v6_6633_0_1	Mus musculus	insulin-like growth factor I receptor	1e-44	TYROSINE-PROTEIN KINASE	ILGF1Ra	RTK	6	Tks,Tls	9	209582	0.0196592	-1.51708
80	dd_Smed_v6_6633_0_1	Mus musculus	insulin-like growth factor I receptor	1e-44	TYROSINE-PROTEIN KINASE	ILGF1Ra	RTK	7	Tks,Tls	11	233276	0.022775	-1.30483
81	dd_Smed_v6_16928_0_1	Danio rerio	eph receptor A4b	0	TYROSINE-PROTEIN KINASE RECEPTOR	EPHA2	RTK	1	Tks,Tls	53	819632	0.0585418	0.0571855
82	dd_Smed_v6_16928_0_1	Danio rerio	eph receptor A4b	0	TYROSINE-PROTEIN KINASE RECEPTOR	EPHA2	RTK	2	Tks,Tls	41	573019	0.0541626	-0.0549863
83	dd_Smed_v6_16928_0_1	Danio rerio	eph receptor A4b	0	TYROSINE-PROTEIN KINASE RECEPTOR	EPHA2	RTK	3	Tks,Tls	36	363885	0.0596788	0.0849369
84	dd_Smed_v6_16928_0_1	Danio rerio	eph receptor A4b	0	TYROSINE-PROTEIN KINASE RECEPTOR	EPHA2	RTK	4	Tks,Tls	33	599528	0.0426196	-0.400766
85	dd_Smed_v6_16928_0_1	Danio rerio	eph receptor A4b	0	TYROSINE-PROTEIN KINASE RECEPTOR	EPHA2	RTK	5	Tks,Tls	42	443810	0.063045	0.1641
86	dd_Smed_v6_16928_0_1	Danio rerio	eph receptor A4b	0	TYROSINE-PROTEIN KINASE RECEPTOR	EPHA2	RTK	6	Tks,Tls	48	642721	0.0598729	0.0896194
87	dd_Smed_v6_11934_0_1	Caenorhabditis briggsae	C. briggsae CBR-PLX-1 protein	5e-78	PLEXIN	PLXN1b	RTK	1	Tks,Tls	44	390533	0.0704083	0.323463
88	dd_Smed_v6_11934_0_1	Caenorhabditis briggsae	C. briggsae CBR-PLX-1 protein	5e-78	PLEXIN	PLXN1b	RTK	2	Tks,Tls	13	654369	0.0160706	-1.80786
89	dd_Smed_v6_11934_0_1	Caenorhabditis briggsae	C. briggsae CBR-PLX-1 protein	5e-78	PLEXIN	PLXN1b	RTK	3	Tks,Tls	15	497194	0.021273	-1.40326
90	dd_Smed_v6_11934_0_1	Caenorhabditis briggsae	C. briggsae CBR-PLX-1 protein	5e-78	PLEXIN	PLXN1b	RTK	4	Tks,Tls	2	315815	0.00355888	-3.98279
91	dd_Smed_v6_11934_0_1	Caenorhabditis briggsae	C. briggsae CBR-PLX-1 protein	5e-78	PLEXIN	PLXN1b	RTK	5	Tks,Tls	1	762831	0.00114495	-5.61893
92	dd_Smed_v6_11934_0_1	Caenorhabditis briggsae	C. briggsae CBR-PLX-1 protein	5e-78	PLEXIN	PLXN1b	RTK	6	Tks,Tls	37	322635	0.0651397	0.211255
93	dd_Smed_v6_11934_0_1	Caenorhabditis briggsae	C. briggsae CBR-PLX-1 protein	5e-78	PLEXIN	PLXN1b	RTK	7	Tks,Tls	28	222596	0.0593471	0.0768943
94	dd_Smed_v6_11934_0_1	Caenorhabditis briggsae	C. briggsae CBR-PLX-1 protein	5e-78	PLEXIN	PLXN1a	RTK	1	Tks,Tls	35	802160	0.0390785	-0.525909
95	dd_Smed_v6_11934_0_1	Caenorhabditis briggsae	C. briggsae CBR-PLX-1 protein	5e-78	PLEXIN	PLXN1a	RTK	2	Tks,Tls	32	385999	0.0515059	-0.127545
96	dd_Smed_v6_11934_0_1	Caenorhabditis briggsae	C. briggsae CBR-PLX-1 protein	5e-78	PLEXIN	PLXN1a	RTK	3	Tks,Tls	26	238798	0.0532057	-0.0807025
97	dd_Smed_v6_11934_0_1	Caenorhabditis briggsae	C. briggsae CBR-PLX-1 protein	5e-78	PLEXIN	PLXN1a	RTK	4	Tks,Tls	27	417647	0.0417791	-0.429501
98	dd_Smed_v6_7988_0_1	Acyrthosiphon pisum	discoidin domain-containing receptor 2-like	8e-32	TYROSINE-PROTEIN KINASE RECEPTOR	DDR2b	RTK	1	Tks,Tls	43	578016	0.0565586	0.00746323
99	dd_Smed_v6_7988_0_1	Acyrthosiphon pisum	discoidin domain-containing receptor 2-like	8e-32	TYROSINE-PROTEIN KINASE RECEPTOR	DDR2b	RTK	2	Tks,Tls	43	661482	0.05287	-0.089833
100	dd_Smed_v6_7988_0_1	Acyrthosiphon pisum	discoidin domain-containing receptor 2-like	8e-32	TYROSINE-PROTEIN KINASE RECEPTOR	DDR2b	RTK	3	Tks,Tls	36	615184	0.0458987	-0.293831
101	dd_Smed_v6_7988_0_1	Acyrthosiphon pisum	discoidin domain-containing receptor 2-like	8e-32	TYROSINE-PROTEIN KINASE RECEPTOR	DDR2b	RTK	4	Tks,Tls	40	760770	0.0458599	-0.295049
102	dd_Smed_v6_7988_0_1	Acyrthosiphon pisum	discoidin domain-containing receptor 2-like	8e-32	TYROSINE-PROTEIN KINASE RECEPTOR	DDR2b	RTK	5	Tks,Tls	35	447148	0.052341	-0.10434
103	dd_Smed_v6_7988_0_1	Acyrthosiphon pisum	discoidin domain-containing receptor 2-like	8e-32	TYROSINE-PROTEIN KINASE RECEPTOR	DDR2b	RTK	6	Tks,Tls	35	368764	0.057636	0.0346873
104	dd_Smed_v6_7988_0_1	Acyrthosiphon pisum	discoidin domain-containing receptor 2-like	8e-32	TYROSINE-PROTEIN KINASE RECEPTOR	DDR2b	RTK	7	Tks,Tls	24	286524	0.0448364	-0.327612
105	dd_Smed_v6_7733_0_1	Homo sapiens	calcitonin receptor	6e-52	G-PROTEIN COUPLED RECEPTOR	CALCR	GPCR	1	Tks,Tls	35	642029	0.0436808	-0.365283
106	dd_Smed_v6_7733_0_1	Homo sapiens	calcitonin receptor	6e-52	G-PROTEIN COUPLED RECEPTOR	CALCR	GPCR	2	Tks,Tls	34	648813	0.0422104	-0.414685
107	dd_Smed_v6_7733_0_1	Homo sapiens	calcitonin receptor	6e-52	G-PROTEIN COUPLED RECEPTOR	CALCR	GPCR	3	Tks,Tls	26	456748	0.0384711	-0.548506
108	dd_Smed_v6_7733_0_1	Homo sapiens	calcitonin receptor	6e-52	G-PROTEIN COUPLED RECEPTOR	CALCR	GPCR	4	Tks,Tls	36	404181	0.0566258	0.00917744
109	dd_Smed_v6_7733_0_1	Homo sapiens	calcitonin receptor	6e-52	G-PROTEIN COUPLED RECEPTOR	CALCR	GPCR	5	Tks,Tls	32	285469	0.0598922	0.0900861
110	dd_Smed_v6_6633_0_1	Mus musculus	insulin-like growth factor I receptor	1e-44	TYROSINE-PROTEIN KINASE	ILGF1Rb	RTK	1	Tks,Tls	18	648969	0.022344	-1.3324
111	dd_Smed_v6_6633_0_1	Mus musculus	insulin-like growth factor I receptor	1e-44	TYROSINE-PROTEIN KINASE	ILGF1Rb	RTK	2	Tks,Tls	14	611661	0.0179008	-1.65226
112	dd_Smed_v6_6633_0_1	Mus musculus	insulin-like growth factor I receptor	1e-44	TYROSINE-PROTEIN KINASE	ILGF1Rb	RTK	3	Tks,Tls	19	270951	0.0365013	-0.624335
113	dd_Smed_v6_6633_0_1	Mus musculus	insulin-like growth factor I receptor	1e-44	TYROSINE-PROTEIN KINASE	ILGF1Rb	RTK	4	Tks,Tls	15	680102	0.0181888	-1.62923
114	dd_Smed_v6_6633_0_1	Mus musculus	insulin-like growth factor I receptor	1e-44	TYROSINE-PROTEIN KINASE	ILGF1Rb	RTK	5	Tks,Tls	8	786654	0.00901983	-2.64111
115	dd_Smed_v6_6633_0_1	Mus musculus	insulin-like growth factor I receptor	1e-44	TYROSINE-PROTEIN KINASE	ILGF1Rb	RTK	6	Tks,Tls	25	610861	0.0319867	-0.814813
116	dd_Smed_v6_9006_0_2	Apis mellifera	insulin-like receptor-like	6e-87	TYROSINE-PROTEIN KINASE RECEPTOR	IGF1R2	RTK	1	Tks,Tls	22	608902	0.0281935	-0.99692
117	dd_Smed_v6_9006_0_2	Apis mellifera	insulin-like receptor-like	6e-87	TYROSINE-PROTEIN KINASE RECEPTOR	IGF1R2	RTK	2	Tks,Tls	41	749617	0.0473548	-0.248772
118	dd_Smed_v6_9006_0_2	Apis mellifera	insulin-like receptor-like	6e-87	TYROSINE-PROTEIN KINASE RECEPTOR	IGF1R2	RTK	3	Tks,Tls	22	513817	0.0306915	-0.874443
119	dd_Smed_v6_9006_0_2	Apis mellifera	insulin-like receptor-like	6e-87	TYROSINE-PROTEIN KINASE RECEPTOR	IGF1R2	RTK	4	Tks,Tls	31	364296	0.0513611	-0.131606
120	dd_Smed_v6_9006_0_2	Apis mellifera	insulin-like receptor-like	6e-87	TYROSINE-PROTEIN KINASE RECEPTOR	IGF1R2	RTK	5	Tks,Tls	25	383434	0.0403733	-0.47888
121	dd_Smed_v6_1574_4_2	Drosophila melanogaster	CG12121 gene product from transcript CG12121-RA	9e-99	LUNG SEVEN TRANSMEMBRANE RECEPTOR	GPR107	GPCR	6	Tks,Tls	41	459047	0.0605139	0.104984
122	dd_Smed_v6_1574_4_2	Drosophila melanogaster	CG12121 gene product from transcript CG12121-RA	9e-99	LUNG SEVEN TRANSMEMBRANE RECEPTOR	GPR107	GPCR	7	Tks,Tls	35	420502	0.0539739	-0.0600201
123	dd_Smed_v6_7897_0_2	Acyrthosiphon pisum	fibroblast growth factor receptor homolog 1-like	8e-55	TYROSINE-PROTEIN KINASE RECEPTOR	FGFR1	RTK	1	Tks,Tls	36	698379	0.0430781	-0.385327
124	dd_Smed_v6_7897_0_2	Acyrthosiphon pisum	fibroblast growth factor receptor homolog 1-like	8e-55	TYROSINE-PROTEIN KINASE RECEPTOR	FGFR1	RTK	2	Tks,Tls	33	596089	0.0427424	-0.396616
125	dd_Smed_v6_7897_0_2	Acyrthosiphon pisum	fibroblast growth factor receptor homolog 1-like	8e-55	TYROSINE-PROTEIN KINASE RECEPTOR	FGFR1	RTK	3	Tks,Tls	41	607211	0.0526155	-0.0967938
126	dd_Smed_v6_7897_0_2	Acyrthosiphon pisum	fibroblast growth factor receptor homolog 1-like	8e-55	TYROSINE-PROTEIN KINASE RECEPTOR	FGFR1	RTK	4	Tks,Tls	45	749973	0.0519625	-0.114813
127	dd_Smed_v6_7897_0_2	Acyrthosiphon pisum	fibroblast growth factor receptor homolog 1-like	8e-55	TYROSINE-PROTEIN KINASE RECEPTOR	FGFR1	RTK	5	Tks,Tls	39	311634	0.0698622	0.312229
128	dd_Smed_v6_7897_0_2	Acyrthosiphon pisum	fibroblast growth factor receptor homolog 1-like	8e-55	TYROSINE-PROTEIN KINASE RECEPTOR	FGFR1	RTK	6	Tks,Tls	27	360095	0.0449941	-0.322548
129	dd_Smed_v6_4818_0_1	Drosophila melanogaster	Btk family kinase at 29A	2e-148	TYROSINE-PROTEIN KINASE	TEC1	TK	1	Tks,Tls	80	551111	0.107763	0.93751
130	dd_Smed_v6_4818_0_1	Drosophila melanogaster	Btk family kinase at 29A	2e-148	TYROSINE-PROTEIN KINASE	TEC1	TK	2	Tks,Tls	51	610153	0.0652906	0.214593
131	dd_Smed_v6_4818_0_1	Drosophila melanogaster	Btk family kinase at 29A	2e-148	TYROSINE-PROTEIN KINASE	TEC1	TK	3	Tks,Tls	60	482532	0.086375	0.618331
132	dd_Smed_v6_4818_0_1	Drosophila melanogaster	Btk family kinase at 29A	2e-148	TYROSINE-PROTEIN KINASE	TEC1	TK	4	Tks,Tls	43	321286	0.0758617	0.431088
133	dd_Smed_v6_4818_0_1	Drosophila melanogaster	Btk family kinase at 29A	2e-148	TYROSINE-PROTEIN KINASE	TEC1	TK	5	Tks,Tls	39	303251	0.0708212	0.331899
134	dd_Smed_v6_4818_0_1	Drosophila melanogaster	Btk family kinase at 29A	2e-148	TYROSINE-PROTEIN KINASE	TEC1	TK	6	Tks,Tls	67	391315	0.107105	0.928677
135	dd_Smed_v6_4818_0_1	Drosophila melanogaster	Btk family kinase at 29A	2e-148	TYROSINE-PROTEIN KINASE	TEC1	TK	7	Tks,Tls	44	255699	0.0870138	0.628962
136	dd_Smed_v6_8641_0_1	Bombyx mori	epidermal growth factor receptor-like	3e-166	TYROSINE-PROTEIN KINASE RECEPTOR	ERBB4	RTK	1	Tks,Tls	1	810459	0.0011108	-5.66262
137	dd_Smed_v6_8641_0_1	Bombyx mori	epidermal growth factor receptor-like	3e-166	TYROSINE-PROTEIN KINASE RECEPTOR	ERBB4	RTK	2	Tks,Tls	27	453770	0.0400817	-0.48934
138	dd_Smed_v6_8641_0_1	Bombyx mori	epidermal growth factor receptor-like	3e-166	TYROSINE-PROTEIN KINASE RECEPTOR	ERBB4	RTK	3	Tks,Tls	32	682386	0.0387378	-0.538541
139	dd_Smed_v6_8641_0_1	Bombyx mori	epidermal growth factor receptor-like	3e-166	TYROSINE-PROTEIN KINASE RECEPTOR	ERBB4	RTK	4	Tks,Tls	35	554581	0.0469987	-0.259663
140	dd_Smed_v6_8641_0_1	Bombyx mori	epidermal growth factor receptor-like	3e-166	TYROSINE-PROTEIN KINASE RECEPTOR	ERBB4	RTK	5	Tks,Tls	24	320483	0.0423944	-0.408408
141	dd_Smed_v6_5979_0_1	Homo sapiens	transmembrane protein 181	8e-108	FAMILY NOT NAMED	TMEM181	TM	1	Tks,Tls	40	803929	0.0446119	-0.334853
142	dd_Smed_v6_5979_0_1	Homo sapiens	transmembrane protein 181	8e-108	FAMILY NOT NAMED	TMEM181	TM	2	Tks,Tls	37	590604	0.0481453	-0.224889
143	dd_Smed_v6_5979_0_1	Homo sapiens	transmembrane protein 181	8e-108	FAMILY NOT NAMED	TMEM181	TM	3	Tks,Tls	45	653476	0.055667	-0.0154611
144	dd_Smed_v6_5979_0_1	Homo sapiens	transmembrane protein 181	8e-108	FAMILY NOT NAMED	TMEM181	TM	4	Tks,Tls	33	564631	0.0439169	-0.357507
145	dd_Smed_v6_5979_0_1	Homo sapiens	transmembrane protein 181	8e-108	FAMILY NOT NAMED	TMEM181	TM	5	Tks,Tls	34	347604	0.0576682	0.0354937
146	dd_Smed_v6_5979_0_1	Homo sapiens	transmembrane protein 181	8e-108	FAMILY NOT NAMED	TMEM181	TM	6	Tks,Tls	33	436225	0.0499642	-0.171389
147	dd_Smed_v6_5979_0_1	Homo sapiens	transmembrane protein 181	8e-108	FAMILY NOT NAMED	TMEM181	TM	7	Tks,Tls	38	561049	0.0507321	-0.149383
148	dd_Smed_v6_5979_0_1	Homo sapiens	transmembrane protein 181	8e-108	FAMILY NOT NAMED	TMEM181	TM	8	Tks,Tls	37	451594	0.0550589	-0.0313066
149	dd_Smed_v6_10020_0_1	Aedes aegypti	neuropeptide f receptor 76f	4e-80	G-PROTEIN COUPLED RECEPTOR	NPFR1	GPCR	1	Tks,Tls	33	395641	0.0524642	-0.100949
150	dd_Smed_v6_10020_0_1	Aedes aegypti	neuropeptide f receptor 76f	4e-80	G-PROTEIN COUPLED RECEPTOR	NPFR1	GPCR	2	Tks,Tls	42	747860	0.0485668	-0.212313
151	dd_Smed_v6_10020_0_1	Aedes aegypti	neuropeptide f receptor 76f	4e-80	G-PROTEIN COUPLED RECEPTOR	NPFR1	GPCR	3	Tks,Tls	34	531439	0.0466393	-0.270736
152	dd_Smed_v6_10020_0_1	Aedes aegypti	neuropeptide f receptor 76f	4e-80	G-PROTEIN COUPLED RECEPTOR	NPFR1	GPCR	4	Tks,Tls	36	405848	0.0565094	0.00620844
153	dd_Smed_v6_10020_0_1	Aedes aegypti	neuropeptide f receptor 76f	4e-80	G-PROTEIN COUPLED RECEPTOR	NPFR1	GPCR	5	Tks,Tls	34	343292	0.0580293	0.0444979
154	dd_Smed_v6_2366_0_1	Drosophila melanogaster	SH2 ankyrin repeat kinase	7e-68	TYROSINE-PROTEIN KINASE	SHARK	TK	1	Tks,Tls	36	521730	0.0498402	-0.174974
155	dd_Smed_v6_2366_0_1	Drosophila melanogaster	SH2 ankyrin repeat kinase	7e-68	TYROSINE-PROTEIN KINASE	SHARK	TK	2	Tks,Tls	28	474211	0.0406605	-0.468656
156	dd_Smed_v6_2366_0_1	Drosophila melanogaster	SH2 ankyrin repeat kinase	7e-68	TYROSINE-PROTEIN KINASE	SHARK	TK	3	Tks,Tls	40	531080	0.0548883	-0.0357833
157	dd_Smed_v6_2366_0_1	Drosophila melanogaster	SH2 ankyrin repeat kinase	7e-68	TYROSINE-PROTEIN KINASE	SHARK	TK	4	Tks,Tls	25	564318	0.0332796	-0.757645
158	dd_Smed_v6_2366_0_1	Drosophila melanogaster	SH2 ankyrin repeat kinase	7e-68	TYROSINE-PROTEIN KINASE	SHARK	TK	5	Tks,Tls	32	353739	0.0538032	-0.0645895
159	dd_Smed_v6_2366_0_1	Drosophila melanogaster	SH2 ankyrin repeat kinase	7e-68	TYROSINE-PROTEIN KINASE	SHARK	TK	6	Tks,Tls	30	369664	0.0493421	-0.189463
160	dd_Smed_v6_2366_0_1	Drosophila melanogaster	SH2 ankyrin repeat kinase	7e-68	TYROSINE-PROTEIN KINASE	SHARK	TK	7	Tks,Tls	35	340195	0.0600073	0.0928552
161	dd_Smed_v6_2366_0_1	Drosophila melanogaster	SH2 ankyrin repeat kinase	7e-68	TYROSINE-PROTEIN KINASE	SHARK	TK	8	Tks,Tls	29	494411	0.0412433	-0.448121
162	dd_Smed_v6_9075_0_4	Homo sapiens	spleen tyrosine kinase	5e-77	TYROSINE-PROTEIN KINASE	SYK	TK	1	Tks,Tls	35	785016	0.0395029	-0.510325
163	dd_Smed_v6_9075_0_4	Homo sapiens	spleen tyrosine kinase	5e-77	TYROSINE-PROTEIN KINASE	SYK	TK	2	Tks,Tls	52	662025	0.0639096	0.18375
164	dd_Smed_v6_9075_0_4	Homo sapiens	spleen tyrosine kinase	5e-77	TYROSINE-PROTEIN KINASE	SYK	TK	3	Tks,Tls	50	716591	0.0590656	0.0700344
165	dd_Smed_v6_9075_0_4	Homo sapiens	spleen tyrosine kinase	5e-77	TYROSINE-PROTEIN KINASE	SYK	TK	4	Tks,Tls	57	721161	0.0671211	0.254483
166	dd_Smed_v6_9075_0_4	Homo sapiens	spleen tyrosine kinase	5e-77	TYROSINE-PROTEIN KINASE	SYK	TK	5	Tks,Tls	26	321241	0.0458731	-0.294635
167	dd_Smed_v6_9075_0_4	Homo sapiens	spleen tyrosine kinase	5e-77	TYROSINE-PROTEIN KINASE	SYK	TK	6	Tks,Tls	37	441539	0.0556823	-0.0150639
168	dd_Smed_v6_9075_0_4	Homo sapiens	spleen tyrosine kinase	5e-77	TYROSINE-PROTEIN KINASE	SYK	TK	7	Tks,Tls	37	324807	0.0649216	0.206415
169	dd_Smed_v6_9911_0_2	Aplysia californica	JNK1/MAPK8-associated membrane protein-like	5e-41	MEDULLOBLASTOMA ANTIGEN MU-MB	JKAMP	kinase regulator	1	Tks,Tls	23	339496	0.0394739	-0.511382
170	dd_Smed_v6_9911_0_2	Aplysia californica	JNK1/MAPK8-associated membrane protein-like	5e-41	MEDULLOBLASTOMA ANTIGEN MU-MB	JKAMP	kinase regulator	2	Tks,Tls	25	463348	0.0367271	-0.615439
171	dd_Smed_v6_9911_0_2	Aplysia californica	JNK1/MAPK8-associated membrane protein-like	5e-41	MEDULLOBLASTOMA ANTIGEN MU-MB	JKAMP	kinase regulator	3	Tks,Tls	41	655398	0.0506444	-0.15188
172	dd_Smed_v6_9911_0_2	Aplysia californica	JNK1/MAPK8-associated membrane protein-like	5e-41	MEDULLOBLASTOMA ANTIGEN MU-MB	JKAMP	kinase regulator	4	Tks,Tls	34	490641	0.0485397	-0.213118
173	dd_Smed_v6_9911_0_2	Aplysia californica	JNK1/MAPK8-associated membrane protein-like	5e-41	MEDULLOBLASTOMA ANTIGEN MU-MB	JKAMP	kinase regulator	5	Tks,Tls	30	331109	0.0521358	-0.110009
174	dd_Smed_v6_5635_0_1	Cynoglossus semilaevis	tyrosine-protein kinase fyna	1e-169	TYROSINE-PROTEIN KINASE	FYN1	TK	1	Tks,Tls	23	574196	0.0303527	-0.890456
175	dd_Smed_v6_5635_0_1	Cynoglossus semilaevis	tyrosine-protein kinase fyna	1e-169	TYROSINE-PROTEIN KINASE	FYN1	TK	2	Tks,Tls	22	350151	0.0371788	-0.597804
176	dd_Smed_v6_5635_0_1	Cynoglossus semilaevis	tyrosine-protein kinase fyna	1e-169	TYROSINE-PROTEIN KINASE	FYN1	TK	3	Tks,Tls	24	474380	0.0348456	-0.691306
177	dd_Smed_v6_5635_0_1	Cynoglossus semilaevis	tyrosine-protein kinase fyna	1e-169	TYROSINE-PROTEIN KINASE	FYN1	TK	4	Tks,Tls	29	526562	0.0399644	-0.493568
178	dd_Smed_v6_5635_0_1	Cynoglossus semilaevis	tyrosine-protein kinase fyna	1e-169	TYROSINE-PROTEIN KINASE	FYN1	TK	5	Tks,Tls	20	276860	0.0380102	-0.565897
179	dd_Smed_v6_5635_0_1	Cynoglossus semilaevis	tyrosine-protein kinase fyna	1e-169	TYROSINE-PROTEIN KINASE	FYN1	TK	6	Tks,Tls	27	373971	0.0441514	-0.349823
180	dd_Smed_v6_5635_0_1	Cynoglossus semilaevis	tyrosine-protein kinase fyna	1e-169	TYROSINE-PROTEIN KINASE	FYN1	TK	7	Tks,Tls	21	259868	0.0411948	-0.449819
181	dd_Smed_v6_13016_0_1	Callithrix jacchus	plexin B2	2e-32	PLEXIN	PLXNB2	RTK	1	Tks,Tls	32	378599	0.0520068	-0.113582
182	dd_Smed_v6_13016_0_1	Callithrix jacchus	plexin B2	2e-32	PLEXIN	PLXNB2	RTK	2	Tks,Tls	41	481027	0.0591152	0.0712463
183	dd_Smed_v6_13016_0_1	Callithrix jacchus	plexin B2	2e-32	PLEXIN	PLXNB2	RTK	3	Tks,Tls	41	544807	0.0555472	-0.0185674
184	dd_Smed_v6_13016_0_1	Callithrix jacchus	plexin B2	2e-32	PLEXIN	PLXNB2	RTK	4	Tks,Tls	33	405898	0.0517971	-0.119411
185	dd_Smed_v6_13016_0_1	Callithrix jacchus	plexin B2	2e-32	PLEXIN	PLXNB2	RTK	5	Tks,Tls	21	223991	0.0443715	-0.34265
186	dd_Smed_v6_13016_0_1	Callithrix jacchus	plexin B2	2e-32	PLEXIN	PLXNB2	RTK	6	Tks,Tls	32	103344	0.0995422	0.823026
187	dd_Smed_v6_5823_0_4	NA	NA	NA	G-PROTEIN COUPLED RECEPTOR-RELATED	GPCR2	GPCR	1	Tks,Tls	27	645629	0.0336026	-0.743712
188	dd_Smed_v6_5823_0_4	NA	NA	NA	G-PROTEIN COUPLED RECEPTOR-RELATED	GPCR2	GPCR	2	Tks,Tls	44	304067	0.0797936	0.50399
189	dd_Smed_v6_5823_0_4	NA	NA	NA	G-PROTEIN COUPLED RECEPTOR-RELATED	GPCR2	GPCR	3	Tks,Tls	48	552231	0.0645923	0.19908
190	dd_Smed_v6_5823_0_4	NA	NA	NA	G-PROTEIN COUPLED RECEPTOR-RELATED	GPCR2	GPCR	4	Tks,Tls	52	773236	0.0591354	0.0717385
191	dd_Smed_v6_5823_0_4	NA	NA	NA	G-PROTEIN COUPLED RECEPTOR-RELATED	GPCR2	GPCR	5	Tks,Tls	36	155886	0.0911799	0.696433
192	dd_Smed_v6_5823_0_4	NA	NA	NA	G-PROTEIN COUPLED RECEPTOR-RELATED	GPCR2	GPCR	6	Tks,Tls	27	329327	0.047049	-0.25812
193	dd_Smed_v6_5823_0_4	NA	NA	NA	G-PROTEIN COUPLED RECEPTOR-RELATED	GPCR2	GPCR	7	Tks,Tls	21	315071	0.0374124	-0.588768
194	dd_Smed_v6_6480_0_1	Drosophila melanogaster	G protein-coupled receptor kinase 1	0	G PROTEIN-COUPLED RECEPTOR KINASE/RIBOSOMAL PROTEI	GPRK1	STK	1	Tks,Tls	32	486554	0.0458759	-0.294547
195	dd_Smed_v6_6480_0_1	Drosophila melanogaster	G protein-coupled receptor kinase 1	0	G PROTEIN-COUPLED RECEPTOR KINASE/RIBOSOMAL PROTEI	GPRK1	STK	2	Tks,Tls	1	795909	0.0011209	-5.64955
196	dd_Smed_v6_6480_0_1	Drosophila melanogaster	G protein-coupled receptor kinase 1	0	G PROTEIN-COUPLED RECEPTOR KINASE/RIBOSOMAL PROTEI	GPRK1	STK	4	Tks,Tls	1	452900	0.00148593	-5.24284
197	dd_Smed_v6_6480_0_1	Drosophila melanogaster	G protein-coupled receptor kinase 1	0	G PROTEIN-COUPLED RECEPTOR KINASE/RIBOSOMAL PROTEI	GPRK1	STK	5	Tks,Tls	1	389011	0.00160332	-5.13315
198	dd_Smed_v6_6480_0_1	Drosophila melanogaster	G protein-coupled receptor kinase 1	0	G PROTEIN-COUPLED RECEPTOR KINASE/RIBOSOMAL PROTEI	GPRK1	STK	6	Tks,Tls	28	444556	0.0419947	-0.422074
199	dd_Smed_v6_6272_0_1	Homo sapiens	FYN proto-oncogene, Src family tyrosine kinase	3e-174	TYROSINE-PROTEIN KINASE	SRC1	TK	1	Tks,Tls	35	664715	0.042929	-0.390332
200	dd_Smed_v6_6272_0_1	Homo sapiens	FYN proto-oncogene, Src family tyrosine kinase	3e-174	TYROSINE-PROTEIN KINASE	SRC1	TK	2	Tks,Tls	34	585582	0.0444309	-0.34072
201	dd_Smed_v6_6272_0_1	Homo sapiens	FYN proto-oncogene, Src family tyrosine kinase	3e-174	TYROSINE-PROTEIN KINASE	SRC1	TK	3	Tks,Tls	38	554124	0.0510482	-0.140424
202	dd_Smed_v6_6272_0_1	Homo sapiens	FYN proto-oncogene, Src family tyrosine kinase	3e-174	TYROSINE-PROTEIN KINASE	SRC1	TK	4	Tks,Tls	35	546602	0.0473405	-0.249209
203	dd_Smed_v6_6799_0_2	Mus musculus	neurotrophic tyrosine kinase, receptor, type 2	2e-30	TYROSINE-PROTEIN KINASE RECEPTOR	NTRK2b	RTK	1	Tks,Tls	54	742124	0.0626838	0.155811
204	dd_Smed_v6_6799_0_2	Mus musculus	neurotrophic tyrosine kinase, receptor, type 2	2e-30	TYROSINE-PROTEIN KINASE RECEPTOR	NTRK2b	RTK	2	Tks,Tls	53	426954	0.081112	0.527633
205	dd_Smed_v6_6799_0_2	Mus musculus	neurotrophic tyrosine kinase, receptor, type 2	2e-30	TYROSINE-PROTEIN KINASE RECEPTOR	NTRK2b	RTK	3	Tks,Tls	1	702599	0.00119302	-5.5596
206	dd_Smed_v6_6799_0_2	Mus musculus	neurotrophic tyrosine kinase, receptor, type 2	2e-30	TYROSINE-PROTEIN KINASE RECEPTOR	NTRK2b	RTK	4	Tks,Tls	45	605036	0.0578525	0.0400958
207	dd_Smed_v6_6799_0_2	Mus musculus	neurotrophic tyrosine kinase, receptor, type 2	2e-30	TYROSINE-PROTEIN KINASE RECEPTOR	NTRK2b	RTK	5	Tks,Tls	43	375005	0.0702182	0.319563
208	dd_Smed_v6_6799_0_2	Mus musculus	neurotrophic tyrosine kinase, receptor, type 2	2e-30	TYROSINE-PROTEIN KINASE RECEPTOR	NTRK2b	RTK	6	Tks,Tls	30	212584	0.0650663	0.209627
209	dd_Smed_v6_6799_0_2	Mus musculus	neurotrophic tyrosine kinase, receptor, type 2	2e-30	TYROSINE-PROTEIN KINASE RECEPTOR	NTRK2b	RTK	7	Tks,Tls	1	311131	0.00179279	-4.97201
210	dd_Smed_v6_6799_0_2	Mus musculus	neurotrophic tyrosine kinase, receptor, type 2	2e-30	TYROSINE-PROTEIN KINASE RECEPTOR	NTRK2a	RTK	1	Tks,Tls	56	603325	0.0720962	0.35764
211	dd_Smed_v6_6799_0_2	Mus musculus	neurotrophic tyrosine kinase, receptor, type 2	2e-30	TYROSINE-PROTEIN KINASE RECEPTOR	NTRK2a	RTK	2	Tks,Tls	53	645512	0.0659665	0.229452
212	dd_Smed_v6_6799_0_2	Mus musculus	neurotrophic tyrosine kinase, receptor, type 2	2e-30	TYROSINE-PROTEIN KINASE RECEPTOR	NTRK2a	RTK	3	Tks,Tls	42	553502	0.0564533	0.00477635
213	dd_Smed_v6_6799_0_2	Mus musculus	neurotrophic tyrosine kinase, receptor, type 2	2e-30	TYROSINE-PROTEIN KINASE RECEPTOR	NTRK2a	RTK	4	Tks,Tls	41	432383	0.0623519	0.14815
214	dd_Smed_v6_6799_0_2	Mus musculus	neurotrophic tyrosine kinase, receptor, type 2	2e-30	TYROSINE-PROTEIN KINASE RECEPTOR	NTRK2a	RTK	5	Tks,Tls	30	262895	0.05851	0.0564004
215	dd_Smed_v6_8408_0_1	Drosophila melanogaster	poor gastrulation	8e-70	G-PROTEIN COUPLED RECEPTOR 158-RELATED	GPR158	GPCR	1	Tks,Tls	41	518959	0.0569138	0.0164949
216	dd_Smed_v6_8408_0_1	Drosophila melanogaster	poor gastrulation	8e-70	G-PROTEIN COUPLED RECEPTOR 158-RELATED	GPR158	GPCR	2	Tks,Tls	38	458977	0.0560903	-0.00453023
217	dd_Smed_v6_8408_0_1	Drosophila melanogaster	poor gastrulation	8e-70	G-PROTEIN COUPLED RECEPTOR 158-RELATED	GPR158	GPCR	3	Tks,Tls	43	674213	0.0523685	-0.103584
218	dd_Smed_v6_8408_0_1	Drosophila melanogaster	poor gastrulation	8e-70	G-PROTEIN COUPLED RECEPTOR 158-RELATED	GPR158	GPCR	4	Tks,Tls	40	473578	0.0581252	0.0468803
219	dd_Smed_v6_8408_0_1	Drosophila melanogaster	poor gastrulation	8e-70	G-PROTEIN COUPLED RECEPTOR 158-RELATED	GPR158	GPCR	5	Tks,Tls	27	363956	0.0447548	-0.330241
220	dd_Smed_v6_8408_0_1	Drosophila melanogaster	poor gastrulation	8e-70	G-PROTEIN COUPLED RECEPTOR 158-RELATED	GPR158	GPCR	6	Tks,Tls	24	317754	0.0425761	-0.402239
221	dd_Smed_v6_8408_0_1	Drosophila melanogaster	poor gastrulation	8e-70	G-PROTEIN COUPLED RECEPTOR 158-RELATED	GPR158	GPCR	7	Tks,Tls	33	439641	0.0497697	-0.177016
222	dd_Smed_v6_8408_0_1	Drosophila melanogaster	poor gastrulation	8e-70	G-PROTEIN COUPLED RECEPTOR 158-RELATED	GPR158	GPCR	8	Tks,Tls	36	389228	0.0577033	0.0363704
223	dd_Smed_v6_10115_0_1	Drosophila melanogaster	Activated Cdc42 kinase-like	5e-74	TYROSINE-PROTEIN KINASE	TK1a	TK	1	Tks,Tls	44	711128	0.052177	-0.108869
224	dd_Smed_v6_10115_0_1	Drosophila melanogaster	Activated Cdc42 kinase-like	5e-74	TYROSINE-PROTEIN KINASE	TK1a	TK	2	Tks,Tls	39	537629	0.0531892	-0.0811501
225	dd_Smed_v6_10115_0_1	Drosophila melanogaster	Activated Cdc42 kinase-like	5e-74	TYROSINE-PROTEIN KINASE	TK1a	TK	3	Tks,Tls	26	247924	0.0522173	-0.107756
226	dd_Smed_v6_10115_0_1	Drosophila melanogaster	Activated Cdc42 kinase-like	5e-74	TYROSINE-PROTEIN KINASE	TK1a	TK	4	Tks,Tls	33	403858	0.0519278	-0.115777
227	dd_Smed_v6_3349_0_1	Homo sapiens	fer (fps/fes related) tyrosine kinase	1e-50	TYROSINE-PROTEIN KINASE	FER	TK	1	Tks,Tls	8	289965	0.0148565	-1.92119
228	dd_Smed_v6_3349_0_1	Homo sapiens	fer (fps/fes related) tyrosine kinase	1e-50	TYROSINE-PROTEIN KINASE	FER	TK	2	Tks,Tls	9	259844	0.0176558	-1.67214
229	dd_Smed_v6_3349_0_1	Homo sapiens	fer (fps/fes related) tyrosine kinase	1e-50	TYROSINE-PROTEIN KINASE	FER	TK	3	Tks,Tls	1	225756	0.00210465	-4.74063
230	dd_Smed_v6_3349_0_1	Homo sapiens	fer (fps/fes related) tyrosine kinase	1e-50	TYROSINE-PROTEIN KINASE	FER	TK	4	Tks,Tls	8	295059	0.0147277	-1.93375
231	dd_Smed_v6_3349_0_1	Homo sapiens	fer (fps/fes related) tyrosine kinase	1e-50	TYROSINE-PROTEIN KINASE	FER	TK	5	Tks,Tls	4	238104	0.00819741	-2.77904
232	dd_Smed_v6_3349_0_1	Homo sapiens	fer (fps/fes related) tyrosine kinase	1e-50	TYROSINE-PROTEIN KINASE	FER	TK	6	Tks,Tls	9	452526	0.0133789	-2.07232
233	dd_Smed_v6_3349_0_1	Homo sapiens	fer (fps/fes related) tyrosine kinase	1e-50	TYROSINE-PROTEIN KINASE	FER	TK	7	Tks,Tls	32	262731	0.0624301	0.14996
234	dd_Smed_v6_3349_0_1	Homo sapiens	fer (fps/fes related) tyrosine kinase	1e-50	TYROSINE-PROTEIN KINASE	FER	TK	8	Tks,Tls	1	203088	0.002219	-4.6643
235	dd_Smed_v6_9416_0_2	Homo sapiens	FYN proto-oncogene, Src family tyrosine kinase	2e-173	TYROSINE-PROTEIN KINASE	FYN3	TK	1	Tks,Tls	46	663220	0.0564845	0.00557139
236	dd_Smed_v6_9416_0_2	Homo sapiens	FYN proto-oncogene, Src family tyrosine kinase	2e-173	TYROSINE-PROTEIN KINASE	FYN3	TK	2	Tks,Tls	40	541181	0.0543737	-0.0493746
237	dd_Smed_v6_9416_0_2	Homo sapiens	FYN proto-oncogene, Src family tyrosine kinase	2e-173	TYROSINE-PROTEIN KINASE	FYN3	TK	3	Tks,Tls	34	544213	0.0460887	-0.28787
238	dd_Smed_v6_9416_0_2	Homo sapiens	FYN proto-oncogene, Src family tyrosine kinase	2e-173	TYROSINE-PROTEIN KINASE	FYN3	TK	4	Tks,Tls	36	385941	0.0579485	0.042488
239	dd_Smed_v6_9416_0_2	Homo sapiens	FYN proto-oncogene, Src family tyrosine kinase	2e-173	TYROSINE-PROTEIN KINASE	FYN3	TK	5	Tks,Tls	26	255968	0.0513902	-0.130789
240	dd_Smed_v6_9416_0_2	Homo sapiens	FYN proto-oncogene, Src family tyrosine kinase	2e-173	TYROSINE-PROTEIN KINASE	FYN3	TK	6	Tks,Tls	22	211796	0.047804	-0.235153
241	dd_Smed_v6_9416_0_2	Homo sapiens	FYN proto-oncogene, Src family tyrosine kinase	2e-173	TYROSINE-PROTEIN KINASE	FYN3	TK	7	Tks,Tls	41	398425	0.0649547	0.207151
242	dd_Smed_v6_7454_0_1	Aplysia californica	latrophilin-3-like	2e-31	G-PROTEIN COUPLED RECEPTOR	LPHN3	GPCR	1	Tks,Tls	42	698435	0.0502558	-0.162992
243	dd_Smed_v6_7454_0_1	Aplysia californica	latrophilin-3-like	2e-31	G-PROTEIN COUPLED RECEPTOR	LPHN3	GPCR	2	Tks,Tls	38	623303	0.048132	-0.225286
244	dd_Smed_v6_7454_0_1	Aplysia californica	latrophilin-3-like	2e-31	G-PROTEIN COUPLED RECEPTOR	LPHN3	GPCR	3	Tks,Tls	38	692573	0.0456616	-0.301302
245	dd_Smed_v6_7454_0_1	Aplysia californica	latrophilin-3-like	2e-31	G-PROTEIN COUPLED RECEPTOR	LPHN3	GPCR	4	Tks,Tls	48	608226	0.0615473	0.129412
246	dd_Smed_v6_7454_0_1	Aplysia californica	latrophilin-3-like	2e-31	G-PROTEIN COUPLED RECEPTOR	LPHN3	GPCR	5	Tks,Tls	41	460132	0.0604425	0.103281
247	dd_Smed_v6_7454_0_1	Aplysia californica	latrophilin-3-like	2e-31	G-PROTEIN COUPLED RECEPTOR	LPHN3	GPCR	6	Tks,Tls	40	565616	0.0531862	-0.0812302
248	dd_Smed_v6_7454_0_1	Aplysia californica	latrophilin-3-like	2e-31	G-PROTEIN COUPLED RECEPTOR	LPHN3	GPCR	7	Tks,Tls	26	528028	0.0357804	-0.653114
249	dd_Smed_v6_7454_0_1	Aplysia californica	latrophilin-3-like	2e-31	G-PROTEIN COUPLED RECEPTOR	LPHN3	GPCR	8	Tks,Tls	44	410009	0.0687157	0.288357
250	dd_Smed_v6_11561_0_1	Homo sapiens	FYN proto-oncogene, Src family tyrosine kinase	0	TYROSINE-PROTEIN KINASE	FYN2	TK	1	Tks,Tls	31	401865	0.0489014	-0.202406
251	dd_Smed_v6_11561_0_1	Homo sapiens	FYN proto-oncogene, Src family tyrosine kinase	0	TYROSINE-PROTEIN KINASE	FYN2	TK	2	Tks,Tls	29	529915	0.0398378	-0.498146
252	dd_Smed_v6_11561_0_1	Homo sapiens	FYN proto-oncogene, Src family tyrosine kinase	0	TYROSINE-PROTEIN KINASE	FYN2	TK	3	Tks,Tls	41	804325	0.045716	-0.299584
253	dd_Smed_v6_11561_0_1	Homo sapiens	FYN proto-oncogene, Src family tyrosine kinase	0	TYROSINE-PROTEIN KINASE	FYN2	TK	4	Tks,Tls	30	412070	0.0467343	-0.267801
254	dd_Smed_v6_10115_0_1	Drosophila melanogaster	Activated Cdc42 kinase-like	5e-74	TYROSINE-PROTEIN KINASE	TK1b	TK	1	Tks,Tls	40	565064	0.0532122	-0.0805255
255	dd_Smed_v6_10115_0_1	Drosophila melanogaster	Activated Cdc42 kinase-like	5e-74	TYROSINE-PROTEIN KINASE	TK1b	TK	2	Tks,Tls	31	474226	0.0450162	-0.321838
256	dd_Smed_v6_10115_0_1	Drosophila melanogaster	Activated Cdc42 kinase-like	5e-74	TYROSINE-PROTEIN KINASE	TK1b	TK	3	Tks,Tls	28	372918	0.0458513	-0.295321
257	dd_Smed_v6_10115_0_1	Drosophila melanogaster	Activated Cdc42 kinase-like	5e-74	TYROSINE-PROTEIN KINASE	TK1b	TK	4	Tks,Tls	34	459507	0.0501571	-0.165827
258	dd_Smed_v6_3365_0_1	Eptesicus fuscus	integrin, alpha 5 (fibronectin receptor, alpha polypeptide)	2e-12	INTEGRIN ALPHA	ITGA5	integrin	1	Tks,Tls	45	514892	0.0627125	0.156471
259	dd_Smed_v6_3365_0_1	Eptesicus fuscus	integrin, alpha 5 (fibronectin receptor, alpha polypeptide)	2e-12	INTEGRIN ALPHA	ITGA5	integrin	2	Tks,Tls	56	523599	0.0773907	0.459877
260	dd_Smed_v6_3365_0_1	Eptesicus fuscus	integrin, alpha 5 (fibronectin receptor, alpha polypeptide)	2e-12	INTEGRIN ALPHA	ITGA5	integrin	3	Tks,Tls	41	641492	0.0511903	-0.136411
261	dd_Smed_v6_3365_0_1	Eptesicus fuscus	integrin, alpha 5 (fibronectin receptor, alpha polypeptide)	2e-12	INTEGRIN ALPHA	ITGA5	integrin	4	Tks,Tls	44	525839	0.0606773	0.108875
262	dd_Smed_v6_3365_0_1	Eptesicus fuscus	integrin, alpha 5 (fibronectin receptor, alpha polypeptide)	2e-12	INTEGRIN ALPHA	ITGA5	integrin	5	Tks,Tls	33	452047	0.049082	-0.197089
263	dd_Smed_v6_3365_0_1	Eptesicus fuscus	integrin, alpha 5 (fibronectin receptor, alpha polypeptide)	2e-12	INTEGRIN ALPHA	ITGA5	integrin	6	Tks,Tls	38	712363	0.0450228	-0.321626
264	dd_Smed_v6_3365_0_1	Eptesicus fuscus	integrin, alpha 5 (fibronectin receptor, alpha polypeptide)	2e-12	INTEGRIN ALPHA	ITGA5	integrin	7	Tks,Tls	29	307670	0.0522824	-0.105958
265	dd_Smed_v6_8571_0_1	Homo sapiens	ABL proto-oncogene 1, non-receptor tyrosine kinase	5e-171	TYROSINE-PROTEIN KINASE	ABL1	TK	1	Tks,Tls	35	559947	0.0467729	-0.266609
266	dd_Smed_v6_8571_0_1	Homo sapiens	ABL proto-oncogene 1, non-receptor tyrosine kinase	5e-171	TYROSINE-PROTEIN KINASE	ABL1	TK	2	Tks,Tls	49	725351	0.0575336	0.0321231
267	dd_Smed_v6_8571_0_1	Homo sapiens	ABL proto-oncogene 1, non-receptor tyrosine kinase	5e-171	TYROSINE-PROTEIN KINASE	ABL1	TK	3	Tks,Tls	42	507130	0.0589779	0.0678928
268	dd_Smed_v6_8571_0_1	Homo sapiens	ABL proto-oncogene 1, non-receptor tyrosine kinase	5e-171	TYROSINE-PROTEIN KINASE	ABL1	TK	4	Tks,Tls	33	347624	0.0559705	-0.00761654
269	dd_Smed_v6_8571_0_1	Homo sapiens	ABL proto-oncogene 1, non-receptor tyrosine kinase	5e-171	TYROSINE-PROTEIN KINASE	ABL1	TK	5	Tks,Tls	26	371117	0.0426794	-0.398744
270	dd_Smed_v6_8571_0_1	Homo sapiens	ABL proto-oncogene 1, non-receptor tyrosine kinase	5e-171	TYROSINE-PROTEIN KINASE	ABL1	TK	7	Tks,Tls	31	308893	0.0557773	-0.0126041
271	dd_Smed_v6_8571_0_1	Homo sapiens	ABL proto-oncogene 1, non-receptor tyrosine kinase	5e-171	TYROSINE-PROTEIN KINASE	ABL1	TK	8	Tks,Tls	34	273775	0.0649803	0.207721
272	dd_Smed_v6_11488_0_1	Ixodes scapularis	allatostatin receptor, putative	3e-08	G-PROTEIN COUPLED RECEPTOR-RELATED	ALSTR	GPCR	1	Tks,Tls	50	688791	0.0602457	0.098576
273	dd_Smed_v6_11488_0_1	Ixodes scapularis	allatostatin receptor, putative	3e-08	G-PROTEIN COUPLED RECEPTOR-RELATED	ALSTR	GPCR	2	Tks,Tls	44	611533	0.0562656	-3.03682e-05
274	dd_Smed_v6_11488_0_1	Ixodes scapularis	allatostatin receptor, putative	3e-08	G-PROTEIN COUPLED RECEPTOR-RELATED	ALSTR	GPCR	3	Tks,Tls	54	630812	0.0679898	0.273035
275	dd_Smed_v6_11488_0_1	Ixodes scapularis	allatostatin receptor, putative	3e-08	G-PROTEIN COUPLED RECEPTOR-RELATED	ALSTR	GPCR	4	Tks,Tls	45	601721	0.0580116	0.0440586
276	dd_Smed_v6_11488_0_1	Ixodes scapularis	allatostatin receptor, putative	3e-08	G-PROTEIN COUPLED RECEPTOR-RELATED	ALSTR	GPCR	5	Tks,Tls	43	564457	0.0572339	0.0245861
277	dd_Smed_v6_11488_0_1	Ixodes scapularis	allatostatin receptor, putative	3e-08	G-PROTEIN COUPLED RECEPTOR-RELATED	ALSTR	GPCR	6	Tks,Tls	37	407780	0.0579414	0.042311
278	dd_Smed_v6_11488_0_1	Ixodes scapularis	allatostatin receptor, putative	3e-08	G-PROTEIN COUPLED RECEPTOR-RELATED	ALSTR	GPCR	7	Tks,Tls	40	494160	0.0569018	0.0161922
279	dd_Smed_v6_11488_0_1	Ixodes scapularis	allatostatin receptor, putative	3e-08	G-PROTEIN COUPLED RECEPTOR-RELATED	ALSTR	GPCR	8	Tks,Tls	41	329602	0.0714149	0.343943
280	dd_Smed_v6_13356_0_1	Homo sapiens	frizzled class receptor 4	2e-94	FRIZZLED	FZD4	FZD	1	Tks,Tls	50	663212	0.0613965	0.125874
281	dd_Smed_v6_13356_0_1	Homo sapiens	frizzled class receptor 4	2e-94	FRIZZLED	FZD4	FZD	2	Tks,Tls	40	14666.2	0.330294	2.5534
282	dd_Smed_v6_13356_0_1	Homo sapiens	frizzled class receptor 4	2e-94	FRIZZLED	FZD4	FZD	4	Tks,Tls	39	542485	0.0529506	-0.0876362
283	dd_Smed_v6_13356_0_1	Homo sapiens	frizzled class receptor 4	2e-94	FRIZZLED	FZD4	FZD	6	Tks,Tls	29	356156	0.0485935	-0.21152
284	dd_Smed_v6_12571_0_1	Drosophila melanogaster	Discoidin domain receptor	3e-33	TYROSINE-PROTEIN KINASE RECEPTOR	DDR	RTK	1	Tks,Tls	37	589794	0.0481783	-0.223899
285	dd_Smed_v6_12571_0_1	Drosophila melanogaster	Discoidin domain receptor	3e-33	TYROSINE-PROTEIN KINASE RECEPTOR	DDR	RTK	2	Tks,Tls	45	622399	0.0570398	0.0196864
286	dd_Smed_v6_12571_0_1	Drosophila melanogaster	Discoidin domain receptor	3e-33	TYROSINE-PROTEIN KINASE RECEPTOR	DDR	RTK	3	Tks,Tls	47	610056	0.0601746	0.0968709
287	dd_Smed_v6_12571_0_1	Drosophila melanogaster	Discoidin domain receptor	3e-33	TYROSINE-PROTEIN KINASE RECEPTOR	DDR	RTK	4	Tks,Tls	48	884031	0.0510514	-0.140333
288	dd_Smed_v6_12571_0_1	Drosophila melanogaster	Discoidin domain receptor	3e-33	TYROSINE-PROTEIN KINASE RECEPTOR	DDR	RTK	5	Tks,Tls	36	399230	0.0569759	0.0180681
289	dd_Smed_v6_12571_0_1	Drosophila melanogaster	Discoidin domain receptor	3e-33	TYROSINE-PROTEIN KINASE RECEPTOR	DDR	RTK	7	Tks,Tls	38	470873	0.0553773	-0.0229883
290	dd_Smed_v6_5048_0_1	NA	NA	NA	TYROSINE-PROTEIN KINASE	TK2	TK	2	Tks,Tls	37	659052	0.0455766	-0.30399
291	dd_Smed_v6_5048_0_1	NA	NA	NA	TYROSINE-PROTEIN KINASE	TK2	TK	3	Tks,Tls	31	597856	0.0400925	-0.48895
292	dd_Smed_v6_5048_0_1	NA	NA	NA	TYROSINE-PROTEIN KINASE	TK2	TK	4	Tks,Tls	32	342915	0.0546458	-0.0421723
293	dd_Smed_v6_5048_0_1	NA	NA	NA	TYROSINE-PROTEIN KINASE	TK2	TK	5	Tks,Tls	26	221271	0.0552728	-0.0257143
294	dd_Smed_v6_3147_0_1	Aplysia californica	Src tyrosine kinase 1	1e-168	TYROSINE-PROTEIN KINASE	SRC2	SRC	1	Tks,Tls	44	605591	0.0565409	0.00701293
295	dd_Smed_v6_3147_0_1	Aplysia californica	Src tyrosine kinase 1	1e-168	TYROSINE-PROTEIN KINASE	SRC2	SRC	2	Tks,Tls	49	568837	0.0649684	0.207455
296	dd_Smed_v6_3147_0_1	Aplysia californica	Src tyrosine kinase 1	1e-168	TYROSINE-PROTEIN KINASE	SRC2	SRC	3	Tks,Tls	78	582880	0.102166	0.860556
297	dd_Smed_v6_3147_0_1	Aplysia californica	Src tyrosine kinase 1	1e-168	TYROSINE-PROTEIN KINASE	SRC2	SRC	4	Tks,Tls	49	745862	0.0567371	0.0120087
298	dd_Smed_v6_3147_0_1	Aplysia californica	Src tyrosine kinase 1	1e-168	TYROSINE-PROTEIN KINASE	SRC2	SRC	5	Tks,Tls	53	744847	0.0614105	0.126202
299	dd_Smed_v6_3147_0_1	Aplysia californica	Src tyrosine kinase 1	1e-168	TYROSINE-PROTEIN KINASE	SRC2	SRC	6	Tks,Tls	44	347757	0.074613	0.407145
300	dd_Smed_v6_3147_0_1	Aplysia californica	Src tyrosine kinase 1	1e-168	TYROSINE-PROTEIN KINASE	SRC2	SRC	7	Tks,Tls	36	542297	0.0488859	-0.202863
301	dd_Smed_v6_2017_0_1	Homo sapiens	integrin, beta 1 (fibronectin receptor, beta polypeptide, antigen CD29 includes MDF2, MSK12)	2e-116	INTEGRIN BETA SUBUNIT	ITGB1	integrin	1	Tks,Tls	39	368953	0.0642065	0.190437
302	dd_Smed_v6_2017_0_1	Homo sapiens	integrin, beta 1 (fibronectin receptor, beta polypeptide, antigen CD29 includes MDF2, MSK12)	2e-116	INTEGRIN BETA SUBUNIT	ITGB1	integrin	2	Tks,Tls	32	356942	0.0535613	-0.0710916
303	dd_Smed_v6_2017_0_1	Homo sapiens	integrin, beta 1 (fibronectin receptor, beta polypeptide, antigen CD29 includes MDF2, MSK12)	2e-116	INTEGRIN BETA SUBUNIT	ITGB1	integrin	3	Tks,Tls	50	350757	0.0844242	0.585373
304	dd_Smed_v6_2017_0_1	Homo sapiens	integrin, beta 1 (fibronectin receptor, beta polypeptide, antigen CD29 includes MDF2, MSK12)	2e-116	INTEGRIN BETA SUBUNIT	ITGB1	integrin	4	Tks,Tls	27	244036	0.0546559	-0.0419063
305	dd_Smed_v6_3773_0_1	Homo sapiens	dual-specificity tyrosine-(Y)-phosphorylation regulated kinase 1B	1e-145	DUAL SPECIFICITY PROTEIN KINASE	DYRK1B	STK/TK	1	Tks,Tls	33	483654	0.0474511	-0.24584
306	dd_Smed_v6_3773_0_1	Homo sapiens	dual-specificity tyrosine-(Y)-phosphorylation regulated kinase 1B	1e-145	DUAL SPECIFICITY PROTEIN KINASE	DYRK1B	STK/TK	2	Tks,Tls	33	534597	0.0451337	-0.318079
307	dd_Smed_v6_3773_0_1	Homo sapiens	dual-specificity tyrosine-(Y)-phosphorylation regulated kinase 1B	1e-145	DUAL SPECIFICITY PROTEIN KINASE	DYRK1B	STK/TK	3	Tks,Tls	25	423157	0.0384317	-0.549987
308	dd_Smed_v6_3773_0_1	Homo sapiens	dual-specificity tyrosine-(Y)-phosphorylation regulated kinase 1B	1e-145	DUAL SPECIFICITY PROTEIN KINASE	DYRK1B	STK/TK	4	Tks,Tls	29	289712	0.0538784	-0.0625755
309	dd_Smed_v6_3773_0_1	Homo sapiens	dual-specificity tyrosine-(Y)-phosphorylation regulated kinase 1B	1e-145	DUAL SPECIFICITY PROTEIN KINASE	DYRK1B	STK/TK	5	Tks,Tls	29	281803	0.0546292	-0.0426093
310	dd_Smed_v6_3773_0_1	Homo sapiens	dual-specificity tyrosine-(Y)-phosphorylation regulated kinase 1B	1e-145	DUAL SPECIFICITY PROTEIN KINASE	DYRK1B	STK/TK	6	Tks,Tls	24	395597	0.0381579	-0.5603
311	dd_Smed_v6_6719_0_1	Anolis carolinensis	phospholipase C, gamma 1	1e-117	PHOSPHOINOSITIDE-SPECIFIC PHOSPHOLIPASE C FAMILY P	PLCG1	other signaling	1	Tks,Tls	46	790768	0.0517289	-0.121312
312	dd_Smed_v6_6719_0_1	Anolis carolinensis	phospholipase C, gamma 1	1e-117	PHOSPHOINOSITIDE-SPECIFIC PHOSPHOLIPASE C FAMILY P	PLCG1	other signaling	2	Tks,Tls	55	804088	0.0613354	0.124436
313	dd_Smed_v6_6719_0_1	Anolis carolinensis	phospholipase C, gamma 1	1e-117	PHOSPHOINOSITIDE-SPECIFIC PHOSPHOLIPASE C FAMILY P	PLCG1	other signaling	3	Tks,Tls	43	453159	0.0638768	0.183009
314	dd_Smed_v6_6039_0_1	Homo sapiens	c-src tyrosine kinase	8e-115	TYROSINE-PROTEIN KINASE	CSK	TK	1	Tks,Tls	42	573729	0.0554493	-0.0211141
315	dd_Smed_v6_6039_0_1	Homo sapiens	c-src tyrosine kinase	8e-115	TYROSINE-PROTEIN KINASE	CSK	TK	2	Tks,Tls	44	416248	0.0681988	0.277463
316	dd_Smed_v6_6039_0_1	Homo sapiens	c-src tyrosine kinase	8e-115	TYROSINE-PROTEIN KINASE	CSK	TK	3	Tks,Tls	46	521443	0.0637022	0.17906
317	dd_Smed_v6_6039_0_1	Homo sapiens	c-src tyrosine kinase	8e-115	TYROSINE-PROTEIN KINASE	CSK	TK	4	Tks,Tls	36	355745	0.0603578	0.101256
318	dd_Smed_v6_6039_0_1	Homo sapiens	c-src tyrosine kinase	8e-115	TYROSINE-PROTEIN KINASE	CSK	TK	5	Tks,Tls	37	328216	0.0645835	0.198884
319	dd_Smed_v6_6039_0_1	Homo sapiens	c-src tyrosine kinase	8e-115	TYROSINE-PROTEIN KINASE	CSK	TK	6	Tks,Tls	32	363598	0.0530688	-0.0844189
320	dd_Smed_v6_6039_0_1	Homo sapiens	c-src tyrosine kinase	8e-115	TYROSINE-PROTEIN KINASE	CSK	TK	7	Tks,Tls	43	334792	0.0743158	0.401385
321	dd_Smed_v6_4352_0_1	Apis mellifera	tyrosine-protein kinase Abl-like	0	TYROSINE-PROTEIN KINASE	ABL1b	TK	1	Tks,Tls	46	633851	0.0577782	0.0382433
322	dd_Smed_v6_4352_0_1	Apis mellifera	tyrosine-protein kinase Abl-like	0	TYROSINE-PROTEIN KINASE	ABL1b	TK	2	Tks,Tls	51	866494	0.0547882	-0.0384163
323	dd_Smed_v6_4352_0_1	Apis mellifera	tyrosine-protein kinase Abl-like	0	TYROSINE-PROTEIN KINASE	ABL1b	TK	3	Tks,Tls	68	978836	0.0687312	0.288682
324	dd_Smed_v6_4352_0_1	Apis mellifera	tyrosine-protein kinase Abl-like	0	TYROSINE-PROTEIN KINASE	ABL1b	TK	4	Tks,Tls	38	579845	0.0499031	-0.173153
325	dd_Smed_v6_4352_0_1	Apis mellifera	tyrosine-protein kinase Abl-like	0	TYROSINE-PROTEIN KINASE	ABL1b	TK	5	Tks,Tls	45	532209	0.0616838	0.13261
326	dd_Smed_v6_4352_0_1	Apis mellifera	tyrosine-protein kinase Abl-like	0	TYROSINE-PROTEIN KINASE	ABL1b	TK	6	Tks,Tls	33	287695	0.0615245	0.128877
327	dd_Smed_v6_4352_0_1	Apis mellifera	tyrosine-protein kinase Abl-like	0	TYROSINE-PROTEIN KINASE	ABL1b	TK	7	Tks,Tls	39	354665	0.0654871	0.218927
328	dd_Smed_v6_4352_0_1	Apis mellifera	tyrosine-protein kinase Abl-like	0	TYROSINE-PROTEIN KINASE	ABL1b	TK	8	Tks,Tls	38	485905	0.054514	-0.0456564
329	dd_Smed_v6_7218_0_1	NA	NA	NA	NA	novel2	other	1	Tks,Tls	33	480469	0.0476081	-0.241074
330	dd_Smed_v6_7218_0_1	NA	NA	NA	NA	novel2	other	2	Tks,Tls	37	558539	0.049508	-0.184622
331	dd_Smed_v6_7218_0_1	NA	NA	NA	NA	novel2	other	3	Tks,Tls	41	446702	0.0613444	0.124649
332	dd_Smed_v6_7218_0_1	NA	NA	NA	NA	novel2	other	4	Tks,Tls	25	235999	0.0514618	-0.128781
333	dd_Smed_v6_7218_0_1	NA	NA	NA	NA	novel2	other	5	Tks,Tls	38	476081	0.0550736	-0.0309228
334	dd_Smed_v6_7911_0_1	Homo sapiens	receptor tyrosine kinase-like orphan receptor 1	2e-134	TYROSINE-PROTEIN KINASE RECEPTOR	ROR	RTK	1	Tks,Tls	47	595513	0.0609049	0.114276
335	dd_Smed_v6_7911_0_1	Homo sapiens	receptor tyrosine kinase-like orphan receptor 1	2e-134	TYROSINE-PROTEIN KINASE RECEPTOR	ROR	RTK	2	Tks,Tls	59	1123865	0.0556538	-0.0158022
336	dd_Smed_v6_7911_0_1	Homo sapiens	receptor tyrosine kinase-like orphan receptor 1	2e-134	TYROSINE-PROTEIN KINASE RECEPTOR	ROR	RTK	3	Tks,Tls	38	382200	0.0614665	0.127517
337	dd_Smed_v6_7911_0_1	Homo sapiens	receptor tyrosine kinase-like orphan receptor 1	2e-134	TYROSINE-PROTEIN KINASE RECEPTOR	ROR	RTK	4	Tks,Tls	45	411891	0.0701167	0.317475
338	dd_Smed_v6_7911_0_1	Homo sapiens	receptor tyrosine kinase-like orphan receptor 1	2e-134	TYROSINE-PROTEIN KINASE RECEPTOR	ROR	RTK	5	Tks,Tls	44	369152	0.0724186	0.364077
339	unc22	NA	NA	NA	NA	ctrl	control	1	H	54	602974	0.0695416	0.305593
340	unc22	NA	NA	NA	NA	ctrl	control	2	H	40	413535	0.0622019	0.144677
341	unc22	NA	NA	NA	NA	ctrl	control	3	H	41	391139	0.0655569	0.220464
342	unc22	NA	NA	NA	NA	ctrl	control	4	H	45	393791	0.07171	0.349891
343	dd_Smed_v6_11285_0_1	NA	NA	NA	NA	NDK	control	1	H	49	337356	0.084363	0.584327
344	dd_Smed_v6_11285_0_1	NA	NA	NA	NA	NDK	control	2	H	39	288005	0.0726716	0.369108
345	dd_Smed_v6_11285_0_1	NA	NA	NA	NA	NDK	control	3	H	46	264111	0.0895086	0.669743
346	dd_Smed_v6_6020_0_1	Drosophila mojavensis	GI23882 gene product from transcript GI23882-RA	4e-53	TYROSINE-PROTEIN KINASE	TK2	TK	1	H	51	504987	0.0717679	0.351055
347	dd_Smed_v6_6020_0_1	Drosophila mojavensis	GI23882 gene product from transcript GI23882-RA	4e-53	TYROSINE-PROTEIN KINASE	TK2	TK	2	H	53	522011	0.0733561	0.382634
348	dd_Smed_v6_6020_0_1	Drosophila mojavensis	GI23882 gene product from transcript GI23882-RA	4e-53	TYROSINE-PROTEIN KINASE	TK2	TK	3	H	45	434187	0.0682927	0.279448
349	dd_Smed_v6_6020_0_1	Drosophila mojavensis	GI23882 gene product from transcript GI23882-RA	4e-53	TYROSINE-PROTEIN KINASE	TK2	TK	4	H	37	344434	0.0630447	0.164093
350	dd_Smed_v6_17134_0_1	Aplysia californica	neuropeptide FF receptor 1-like	4e-09	G-PROTEIN COUPLED RECEPTOR-RELATED	NPFFR1	GPCR	1	H	38	759651	0.043599	-0.367988
351	dd_Smed_v6_17134_0_1	Aplysia californica	neuropeptide FF receptor 1-like	4e-09	G-PROTEIN COUPLED RECEPTOR-RELATED	NPFFR1	GPCR	2	H	49	842045	0.0533984	-0.0754856
352	dd_Smed_v6_17134_0_1	Aplysia californica	neuropeptide FF receptor 1-like	4e-09	G-PROTEIN COUPLED RECEPTOR-RELATED	NPFFR1	GPCR	3	H	46	1122651	0.0434146	-0.374104
353	dd_Smed_v6_8973_0_1	Homo sapiens	leukocyte receptor tyrosine kinase	5e-59	UNCHARACTERIZED	LRTK	RTK	1	H	48	531525	0.0658384	0.226647
354	dd_Smed_v6_8973_0_1	Homo sapiens	leukocyte receptor tyrosine kinase	5e-59	UNCHARACTERIZED	LRTK	RTK	2	H	31	314273	0.0552978	-0.0250597
355	dd_Smed_v6_8973_0_1	Homo sapiens	leukocyte receptor tyrosine kinase	5e-59	UNCHARACTERIZED	LRTK	RTK	3	H	32	253291	0.0635829	0.176355
356	dd_Smed_v6_9381_0_1	Drosophila melanogaster	RYamide receptor	8e-47	G-PROTEIN COUPLED RECEPTOR	RYAR	GPCR	1	H	43	474919	0.0623963	0.149177
357	dd_Smed_v6_9381_0_1	Drosophila melanogaster	RYamide receptor	8e-47	G-PROTEIN COUPLED RECEPTOR	RYAR	GPCR	2	H	34	391936	0.0543089	-0.051093
358	dd_Smed_v6_9381_0_1	Drosophila melanogaster	RYamide receptor	8e-47	G-PROTEIN COUPLED RECEPTOR	RYAR	GPCR	3	H	44	454711	0.0652507	0.21371
359	dd_Smed_v6_9381_0_1	Drosophila melanogaster	RYamide receptor	8e-47	G-PROTEIN COUPLED RECEPTOR	RYAR	GPCR	4	H	42	395932	0.0667481	0.246444
360	dd_Smed_v6_3363_0_1	Aplysia californica	Src tyrosine kinase 1	1e-153	TYROSINE-PROTEIN KINASE	HCK	TK	1	H	32	359455	0.0533737	-0.0761524
361	dd_Smed_v6_3363_0_1	Aplysia californica	Src tyrosine kinase 1	1e-153	TYROSINE-PROTEIN KINASE	HCK	TK	2	H	31	221109	0.0659263	0.228571
362	dd_Smed_v6_3363_0_1	Aplysia californica	Src tyrosine kinase 1	1e-153	TYROSINE-PROTEIN KINASE	HCK	TK	3	H	28	296674	0.0514065	-0.130331
363	dd_Smed_v6_5170_0_1	Drosophila melanogaster	CG10483 gene product from transcript CG10483-RA	2e-159	XENOTROPIC AND POLYTROPIC RETROVIRUS RECEPTOR 1-RE	XPR1	signaling other	1	H	39	367845	0.0643031	0.192606
364	dd_Smed_v6_5170_0_1	Drosophila melanogaster	CG10483 gene product from transcript CG10483-RA	2e-159	XENOTROPIC AND POLYTROPIC RETROVIRUS RECEPTOR 1-RE	XPR1	signaling other	2	H	54	581608	0.0708074	0.331617
365	dd_Smed_v6_5170_0_1	Drosophila melanogaster	CG10483 gene product from transcript CG10483-RA	2e-159	XENOTROPIC AND POLYTROPIC RETROVIRUS RECEPTOR 1-RE	XPR1	signaling other	3	H	23	173283	0.0552522	-0.0262499
366	dd_Smed_v6_5900_0_1	Homo sapiens	integrin alpha FG-GAP repeat containing 2	4e-44	INTEGRIN ALPHA REPEAT DOMAIN-CONTAINING	ITFG2	integrin	1	H	18	111629	0.0538746	-0.0626777
367	dd_Smed_v6_5900_0_1	Homo sapiens	integrin alpha FG-GAP repeat containing 2	4e-44	INTEGRIN ALPHA REPEAT DOMAIN-CONTAINING	ITFG2	integrin	2	H	39	541094	0.0530186	-0.0857842
368	dd_Smed_v6_5900_0_1	Homo sapiens	integrin alpha FG-GAP repeat containing 2	4e-44	INTEGRIN ALPHA REPEAT DOMAIN-CONTAINING	ITFG2	integrin	3	H	53	569302	0.0702432	0.320077
369	dd_Smed_v6_5900_0_1	Homo sapiens	integrin alpha FG-GAP repeat containing 2	4e-44	INTEGRIN ALPHA REPEAT DOMAIN-CONTAINING	ITFG2	integrin	4	H	50	643011	0.0623535	0.148188
370	dd_Smed_v6_17433_0_1	NA	NA	NA	G-PROTEIN COUPLED RECEPTOR-RELATED	GPCR5	GPCR	1	H	32	304537	0.0579869	0.0434444
371	dd_Smed_v6_17433_0_1	NA	NA	NA	G-PROTEIN COUPLED RECEPTOR-RELATED	GPCR5	GPCR	2	H	30	213557	0.0649179	0.206333
372	dd_Smed_v6_8643_0_1	Bombus impatiens	neuropeptides capa receptor-like	6e-10	G-PROTEIN COUPLED RECEPTOR-RELATED	GPCR3	GPCR	1	H	38	280516	0.0717472	0.350639
373	dd_Smed_v6_8643_0_1	Bombus impatiens	neuropeptides capa receptor-like	6e-10	G-PROTEIN COUPLED RECEPTOR-RELATED	GPCR3	GPCR	2	H	46	431031	0.0700654	0.316419
374	dd_Smed_v6_8643_0_1	Bombus impatiens	neuropeptides capa receptor-like	6e-10	G-PROTEIN COUPLED RECEPTOR-RELATED	GPCR3	GPCR	3	H	51	595605	0.0660832	0.232001
375	dd_Smed_v6_8643_0_1	Bombus impatiens	neuropeptides capa receptor-like	6e-10	G-PROTEIN COUPLED RECEPTOR-RELATED	GPCR3	GPCR	4	H	36	281736	0.0678237	0.269506
376	dd_Smed_v6_9474_0_1	Drosophila melanogaster	smoothened	5e-16	FRIZZLED	SMO	GPCR	1	H	35	392386	0.0558742	-0.0101006
377	dd_Smed_v6_9474_0_1	Drosophila melanogaster	smoothened	5e-16	FRIZZLED	SMO	GPCR	2	H	46	398065	0.0729089	0.373813
378	dd_Smed_v6_9474_0_1	Drosophila melanogaster	smoothened	5e-16	FRIZZLED	SMO	GPCR	3	H	43	457398	0.0635801	0.176293
379	dd_Smed_v6_9474_0_1	Drosophila melanogaster	smoothened	5e-16	FRIZZLED	SMO	GPCR	4	H	44	488972	0.0629232	0.161309
380	dd_Smed_v6_6633_0_1	Mus musculus	insulin-like growth factor I receptor	1e-44	TYROSINE-PROTEIN KINASE	ILGF1Ra	RTK	1	H	28	627680	0.0353418	-0.670907
381	dd_Smed_v6_6633_0_1	Mus musculus	insulin-like growth factor I receptor	1e-44	TYROSINE-PROTEIN KINASE	ILGF1Ra	RTK	2	H	17	254783	0.0336793	-0.740418
382	dd_Smed_v6_6633_0_1	Mus musculus	insulin-like growth factor I receptor	1e-44	TYROSINE-PROTEIN KINASE	ILGF1Ra	RTK	3	H	21	525451	0.0289703	-0.957708
383	dd_Smed_v6_6633_0_1	Mus musculus	insulin-like growth factor I receptor	1e-44	TYROSINE-PROTEIN KINASE	ILGF1Ra	RTK	4	H	19	458640	0.0280555	-1.004
384	dd_Smed_v6_16928_0_1	Danio rerio	eph receptor A4b	0	TYROSINE-PROTEIN KINASE RECEPTOR	EPHA2	RTK	1	H	52	540476	0.0707319	0.330078
385	dd_Smed_v6_16928_0_1	Danio rerio	eph receptor A4b	0	TYROSINE-PROTEIN KINASE RECEPTOR	EPHA2	RTK	2	H	50	539374	0.0680809	0.274966
386	dd_Smed_v6_16928_0_1	Danio rerio	eph receptor A4b	0	TYROSINE-PROTEIN KINASE RECEPTOR	EPHA2	RTK	3	H	49	457236	0.0724646	0.364994
387	dd_Smed_v6_16928_0_1	Danio rerio	eph receptor A4b	0	TYROSINE-PROTEIN KINASE RECEPTOR	EPHA2	RTK	4	H	54	531988	0.074036	0.395944
388	dd_Smed_v6_11934_0_1	Caenorhabditis briggsae	C. briggsae CBR-PLX-1 protein	5e-78	PLEXIN	PLXN1b	RTK	1	H	49	631615	0.0616552	0.13194
389	dd_Smed_v6_11934_0_1	Caenorhabditis briggsae	C. briggsae CBR-PLX-1 protein	5e-78	PLEXIN	PLXN1b	RTK	2	H	46	393945	0.0732892	0.381318
390	dd_Smed_v6_11934_0_1	Caenorhabditis briggsae	C. briggsae CBR-PLX-1 protein	5e-78	PLEXIN	PLXN1a	RTK	1	H	43	412646	0.0669391	0.250566
391	dd_Smed_v6_11934_0_1	Caenorhabditis briggsae	C. briggsae CBR-PLX-1 protein	5e-78	PLEXIN	PLXN1a	RTK	2	H	45	440227	0.0678226	0.269482
392	dd_Smed_v6_11934_0_1	Caenorhabditis briggsae	C. briggsae CBR-PLX-1 protein	5e-78	PLEXIN	PLXN1a	RTK	3	H	50	396660	0.0793891	0.496658
393	dd_Smed_v6_11934_0_1	Caenorhabditis briggsae	C. briggsae CBR-PLX-1 protein	5e-78	PLEXIN	PLXN1a	RTK	4	H	46	472591	0.0669137	0.250019
394	dd_Smed_v6_7988_0_1	Acyrthosiphon pisum	discoidin domain-containing receptor 2-like	8e-32	TYROSINE-PROTEIN KINASE RECEPTOR	DDR2b	RTK	1	H	46	468530	0.0672031	0.256244
395	dd_Smed_v6_7988_0_1	Acyrthosiphon pisum	discoidin domain-containing receptor 2-like	8e-32	TYROSINE-PROTEIN KINASE RECEPTOR	DDR2b	RTK	2	H	42	460832	0.0618697	0.13695
396	dd_Smed_v6_7733_0_1	Homo sapiens	calcitonin receptor	6e-52	G-PROTEIN COUPLED RECEPTOR	CALCR	GPCR	1	H	48	541388	0.0652359	0.213384
397	dd_Smed_v6_6633_0_1	Mus musculus	insulin-like growth factor I receptor	1e-44	TYROSINE-PROTEIN KINASE	ILGF1Rb	RTK	1	H	19	520761	0.026329	-1.09563
398	dd_Smed_v6_6633_0_1	Mus musculus	insulin-like growth factor I receptor	1e-44	TYROSINE-PROTEIN KINASE	ILGF1Rb	RTK	2	H	7	234170	0.0144655	-1.95967
399	dd_Smed_v6_6633_0_1	Mus musculus	insulin-like growth factor I receptor	1e-44	TYROSINE-PROTEIN KINASE	ILGF1Rb	RTK	3	H	12	461704	0.0176604	-1.67177
400	dd_Smed_v6_9006_0_2	Apis mellifera	insulin-like receptor-like	6e-87	TYROSINE-PROTEIN KINASE RECEPTOR	IGF1R2	RTK	1	H	24	434128	0.0364252	-0.627345
401	dd_Smed_v6_9006_0_2	Apis mellifera	insulin-like receptor-like	6e-87	TYROSINE-PROTEIN KINASE RECEPTOR	IGF1R2	RTK	2	H	27	434668	0.0409529	-0.458316
402	dd_Smed_v6_9006_0_2	Apis mellifera	insulin-like receptor-like	6e-87	TYROSINE-PROTEIN KINASE RECEPTOR	IGF1R2	RTK	3	H	43	396406	0.0682965	0.279529
403	dd_Smed_v6_1574_4_2	Drosophila melanogaster	CG12121 gene product from transcript CG12121-RA	9e-99	LUNG SEVEN TRANSMEMBRANE RECEPTOR	GPR107	GPCR	1	H	54	619749	0.068594	0.285799
404	dd_Smed_v6_1574_4_2	Drosophila melanogaster	CG12121 gene product from transcript CG12121-RA	9e-99	LUNG SEVEN TRANSMEMBRANE RECEPTOR	GPR107	GPCR	2	H	21	454866	0.0311371	-0.85365
405	dd_Smed_v6_1574_4_2	Drosophila melanogaster	CG12121 gene product from transcript CG12121-RA	9e-99	LUNG SEVEN TRANSMEMBRANE RECEPTOR	GPR107	GPCR	3	H	51	576565	0.0671655	0.255437
406	dd_Smed_v6_7897_0_2	Acyrthosiphon pisum	fibroblast growth factor receptor homolog 1-like	8e-55	TYROSINE-PROTEIN KINASE RECEPTOR	FGFR1	RTK	1	H	48	593294	0.062317	0.147342
407	dd_Smed_v6_7897_0_2	Acyrthosiphon pisum	fibroblast growth factor receptor homolog 1-like	8e-55	TYROSINE-PROTEIN KINASE RECEPTOR	FGFR1	RTK	2	H	46	451555	0.0684546	0.282864
408	dd_Smed_v6_7897_0_2	Acyrthosiphon pisum	fibroblast growth factor receptor homolog 1-like	8e-55	TYROSINE-PROTEIN KINASE RECEPTOR	FGFR1	RTK	3	H	43	507451	0.0603631	0.101383
409	dd_Smed_v6_4818_0_1	Drosophila melanogaster	Btk family kinase at 29A	2e-148	TYROSINE-PROTEIN KINASE	TEC1	TK	1	H	68	611863	0.0869324	0.627612
410	dd_Smed_v6_4818_0_1	Drosophila melanogaster	Btk family kinase at 29A	2e-148	TYROSINE-PROTEIN KINASE	TEC1	TK	2	H	78	529641	0.107178	0.929648
411	dd_Smed_v6_4818_0_1	Drosophila melanogaster	Btk family kinase at 29A	2e-148	TYROSINE-PROTEIN KINASE	TEC1	TK	3	H	64	444610	0.0959821	0.770483
412	dd_Smed_v6_4818_0_1	Drosophila melanogaster	Btk family kinase at 29A	2e-148	TYROSINE-PROTEIN KINASE	TEC1	TK	4	H	86	646389	0.106967	0.926817
413	dd_Smed_v6_5979_0_1	Homo sapiens	transmembrane protein 181	8e-108	FAMILY NOT NAMED	TMEM181	TM	1	H	48	443189	0.0721019	0.357755
414	dd_Smed_v6_5979_0_1	Homo sapiens	transmembrane protein 181	8e-108	FAMILY NOT NAMED	TMEM181	TM	2	H	52	590784	0.0676533	0.265878
415	dd_Smed_v6_5979_0_1	Homo sapiens	transmembrane protein 181	8e-108	FAMILY NOT NAMED	TMEM181	TM	3	H	46	656006	0.0567942	0.0134606
416	dd_Smed_v6_5979_0_1	Homo sapiens	transmembrane protein 181	8e-108	FAMILY NOT NAMED	TMEM181	TM	4	H	40	510831	0.0559656	-0.00774176
417	dd_Smed_v6_10020_0_1	Aedes aegypti	neuropeptide f receptor 76f	4e-80	G-PROTEIN COUPLED RECEPTOR	NPFR1	GPCR	1	H	43	515019	0.0599179	0.0907051
418	dd_Smed_v6_10020_0_1	Aedes aegypti	neuropeptide f receptor 76f	4e-80	G-PROTEIN COUPLED RECEPTOR	NPFR1	GPCR	2	H	44	473982	0.0639104	0.183769
419	dd_Smed_v6_10020_0_1	Aedes aegypti	neuropeptide f receptor 76f	4e-80	G-PROTEIN COUPLED RECEPTOR	NPFR1	GPCR	3	H	42	438556	0.0634215	0.17269
420	dd_Smed_v6_10020_0_1	Aedes aegypti	neuropeptide f receptor 76f	4e-80	G-PROTEIN COUPLED RECEPTOR	NPFR1	GPCR	4	H	71	545309	0.0961473	0.772964
421	dd_Smed_v6_2366_0_1	Drosophila melanogaster	SH2 ankyrin repeat kinase	7e-68	TYROSINE-PROTEIN KINASE	SHARK	TK	1	H	33	451232	0.0491263	-0.195787
422	dd_Smed_v6_2366_0_1	Drosophila melanogaster	SH2 ankyrin repeat kinase	7e-68	TYROSINE-PROTEIN KINASE	SHARK	TK	2	H	40	497770	0.0566951	0.0109416
423	dd_Smed_v6_2366_0_1	Drosophila melanogaster	SH2 ankyrin repeat kinase	7e-68	TYROSINE-PROTEIN KINASE	SHARK	TK	3	H	36	397236	0.0571187	0.02168
424	dd_Smed_v6_9075_0_4	Homo sapiens	spleen tyrosine kinase	5e-77	TYROSINE-PROTEIN KINASE	SYK	TK	1	H	38	260119	0.0745071	0.405095
425	dd_Smed_v6_9075_0_4	Homo sapiens	spleen tyrosine kinase	5e-77	TYROSINE-PROTEIN KINASE	SYK	TK	2	H	53	458304	0.0782887	0.476521
426	dd_Smed_v6_9075_0_4	Homo sapiens	spleen tyrosine kinase	5e-77	TYROSINE-PROTEIN KINASE	SYK	TK	3	H	49	698325	0.0586364	0.0595139
427	dd_Smed_v6_9075_0_4	Homo sapiens	spleen tyrosine kinase	5e-77	TYROSINE-PROTEIN KINASE	SYK	TK	4	H	50	600254	0.0645361	0.197823
428	dd_Smed_v6_9911_0_2	Aplysia californica	JNK1/MAPK8-associated membrane protein-like	5e-41	MEDULLOBLASTOMA ANTIGEN MU-MB	JKAMP	kinase regulator	1	H	32	237163	0.0657092	0.223814
429	dd_Smed_v6_9911_0_2	Aplysia californica	JNK1/MAPK8-associated membrane protein-like	5e-41	MEDULLOBLASTOMA ANTIGEN MU-MB	JKAMP	kinase regulator	2	H	53	569150	0.0702526	0.320269
430	dd_Smed_v6_5635_0_1	Cynoglossus semilaevis	tyrosine-protein kinase fyna	1e-169	TYROSINE-PROTEIN KINASE	FYN1	TK	1	H	25	221138	0.0531629	-0.0818641
431	dd_Smed_v6_5635_0_1	Cynoglossus semilaevis	tyrosine-protein kinase fyna	1e-169	TYROSINE-PROTEIN KINASE	FYN1	TK	2	H	30	342682	0.0512478	-0.134791
432	dd_Smed_v6_5635_0_1	Cynoglossus semilaevis	tyrosine-protein kinase fyna	1e-169	TYROSINE-PROTEIN KINASE	FYN1	TK	3	H	29	375274	0.0473395	-0.249238
433	dd_Smed_v6_5635_0_1	Cynoglossus semilaevis	tyrosine-protein kinase fyna	1e-169	TYROSINE-PROTEIN KINASE	FYN1	TK	4	H	33	481429	0.0475607	-0.242514
434	dd_Smed_v6_13016_0_1	Callithrix jacchus	plexin B2	2e-32	PLEXIN	PLXNB2	RTK	1	H	39	273739	0.0745412	0.405755
435	dd_Smed_v6_13016_0_1	Callithrix jacchus	plexin B2	2e-32	PLEXIN	PLXNB2	RTK	2	H	41	307535	0.0739327	0.39393
436	dd_Smed_v6_13016_0_1	Callithrix jacchus	plexin B2	2e-32	PLEXIN	PLXNB2	RTK	3	H	31	432965	0.0471124	-0.256176
437	dd_Smed_v6_13016_0_1	Callithrix jacchus	plexin B2	2e-32	PLEXIN	PLXNB2	RTK	4	H	39	475658	0.056548	0.00719309
438	dd_Smed_v6_5823_0_4	NA	NA	NA	G-PROTEIN COUPLED RECEPTOR-RELATED	GPCR2	GPCR	1	H	37	386810	0.0594912	0.080394
439	dd_Smed_v6_5823_0_4	NA	NA	NA	G-PROTEIN COUPLED RECEPTOR-RELATED	GPCR2	GPCR	2	H	50	610902	0.0639712	0.185139
440	dd_Smed_v6_5823_0_4	NA	NA	NA	G-PROTEIN COUPLED RECEPTOR-RELATED	GPCR2	GPCR	3	H	42	421155	0.0647185	0.201895
441	dd_Smed_v6_5823_0_4	NA	NA	NA	G-PROTEIN COUPLED RECEPTOR-RELATED	GPCR2	GPCR	4	H	37	269677	0.0712492	0.34059
442	dd_Smed_v6_6480_0_1	Drosophila melanogaster	G protein-coupled receptor kinase 1	0	G PROTEIN-COUPLED RECEPTOR KINASE/RIBOSOMAL PROTEI	GPRK1	STK	1	H	33	518756	0.0458176	-0.296381
443	dd_Smed_v6_6480_0_1	Drosophila melanogaster	G protein-coupled receptor kinase 1	0	G PROTEIN-COUPLED RECEPTOR KINASE/RIBOSOMAL PROTEI	GPRK1	STK	2	H	35	489649	0.0500179	-0.169838
444	dd_Smed_v6_6480_0_1	Drosophila melanogaster	G protein-coupled receptor kinase 1	0	G PROTEIN-COUPLED RECEPTOR KINASE/RIBOSOMAL PROTEI	GPRK1	STK	3	H	40	1016334	0.0396773	-0.50397
445	dd_Smed_v6_6480_0_1	Drosophila melanogaster	G protein-coupled receptor kinase 1	0	G PROTEIN-COUPLED RECEPTOR KINASE/RIBOSOMAL PROTEI	GPRK1	STK	4	H	41	609576	0.0525134	-0.0995979
446	dd_Smed_v6_6272_0_1	Homo sapiens	FYN proto-oncogene, Src family tyrosine kinase	3e-174	TYROSINE-PROTEIN KINASE	SRC1	TK	1	H	36	502172	0.0508015	-0.147413
447	dd_Smed_v6_6272_0_1	Homo sapiens	FYN proto-oncogene, Src family tyrosine kinase	3e-174	TYROSINE-PROTEIN KINASE	SRC1	TK	2	H	37	490523	0.052829	-0.0909538
448	dd_Smed_v6_6272_0_1	Homo sapiens	FYN proto-oncogene, Src family tyrosine kinase	3e-174	TYROSINE-PROTEIN KINASE	SRC1	TK	3	H	30	656344	0.0370302	-0.603582
449	dd_Smed_v6_6272_0_1	Homo sapiens	FYN proto-oncogene, Src family tyrosine kinase	3e-174	TYROSINE-PROTEIN KINASE	SRC1	TK	4	H	41	501097	0.0579193	0.0417602
450	dd_Smed_v6_6799_0_2	Mus musculus	neurotrophic tyrosine kinase, receptor, type 2	2e-30	TYROSINE-PROTEIN KINASE RECEPTOR	NTRK2b	RTK	1	H	31	344800	0.0527932	-0.0919304
451	dd_Smed_v6_6799_0_2	Mus musculus	neurotrophic tyrosine kinase, receptor, type 2	2e-30	TYROSINE-PROTEIN KINASE RECEPTOR	NTRK2b	RTK	2	H	45	587734	0.0586978	0.0610246
452	dd_Smed_v6_6799_0_2	Mus musculus	neurotrophic tyrosine kinase, receptor, type 2	2e-30	TYROSINE-PROTEIN KINASE RECEPTOR	NTRK2b	RTK	3	H	50	549782	0.0674334	0.26118
453	dd_Smed_v6_6799_0_2	Mus musculus	neurotrophic tyrosine kinase, receptor, type 2	2e-30	TYROSINE-PROTEIN KINASE RECEPTOR	NTRK2a	RTK	1	H	43	363684	0.0713028	0.341675
454	dd_Smed_v6_6799_0_2	Mus musculus	neurotrophic tyrosine kinase, receptor, type 2	2e-30	TYROSINE-PROTEIN KINASE RECEPTOR	NTRK2a	RTK	2	H	50	610199	0.064008	0.185969
455	dd_Smed_v6_8408_0_1	Drosophila melanogaster	poor gastrulation	8e-70	G-PROTEIN COUPLED RECEPTOR 158-RELATED	GPR158	GPCR	1	H	37	465018	0.0542584	-0.0524367
456	dd_Smed_v6_8408_0_1	Drosophila melanogaster	poor gastrulation	8e-70	G-PROTEIN COUPLED RECEPTOR 158-RELATED	GPR158	GPCR	2	H	42	486685	0.060204	0.0975765
457	dd_Smed_v6_8408_0_1	Drosophila melanogaster	poor gastrulation	8e-70	G-PROTEIN COUPLED RECEPTOR 158-RELATED	GPR158	GPCR	3	H	40	507591	0.0561439	-0.00315232
458	dd_Smed_v6_8408_0_1	Drosophila melanogaster	poor gastrulation	8e-70	G-PROTEIN COUPLED RECEPTOR 158-RELATED	GPR158	GPCR	4	H	43	537439	0.0586549	0.0599678
459	dd_Smed_v6_10115_0_1	Drosophila melanogaster	Activated Cdc42 kinase-like	5e-74	TYROSINE-PROTEIN KINASE	TK1a	TK	1	H	30	336777	0.0516952	-0.122253
460	dd_Smed_v6_10115_0_1	Drosophila melanogaster	Activated Cdc42 kinase-like	5e-74	TYROSINE-PROTEIN KINASE	TK1a	TK	2	H	42	344170	0.0715917	0.34751
461	dd_Smed_v6_10115_0_1	Drosophila melanogaster	Activated Cdc42 kinase-like	5e-74	TYROSINE-PROTEIN KINASE	TK1a	TK	3	H	43	498799	0.0608843	0.113789
462	dd_Smed_v6_10115_0_1	Drosophila melanogaster	Activated Cdc42 kinase-like	5e-74	TYROSINE-PROTEIN KINASE	TK1a	TK	4	H	40	609053	0.0512546	-0.134603
463	dd_Smed_v6_3349_0_1	Homo sapiens	fer (fps/fes related) tyrosine kinase	1e-50	TYROSINE-PROTEIN KINASE	FER	TK	1	H	7	356786	0.0117191	-2.26342
464	dd_Smed_v6_3349_0_1	Homo sapiens	fer (fps/fes related) tyrosine kinase	1e-50	TYROSINE-PROTEIN KINASE	FER	TK	2	H	11	501282	0.0155364	-1.85663
465	dd_Smed_v6_3349_0_1	Homo sapiens	fer (fps/fes related) tyrosine kinase	1e-50	TYROSINE-PROTEIN KINASE	FER	TK	3	H	16	306207	0.0289143	-0.9605
466	dd_Smed_v6_3349_0_1	Homo sapiens	fer (fps/fes related) tyrosine kinase	1e-50	TYROSINE-PROTEIN KINASE	FER	TK	4	H	12	524819	0.0165644	-1.76419
467	dd_Smed_v6_9416_0_2	Homo sapiens	FYN proto-oncogene, Src family tyrosine kinase	2e-173	TYROSINE-PROTEIN KINASE	FYN3	TK	1	H	50	555720	0.0670721	0.25343
468	dd_Smed_v6_9416_0_2	Homo sapiens	FYN proto-oncogene, Src family tyrosine kinase	2e-173	TYROSINE-PROTEIN KINASE	FYN3	TK	2	H	40	462128	0.0588408	0.064535
469	dd_Smed_v6_9416_0_2	Homo sapiens	FYN proto-oncogene, Src family tyrosine kinase	2e-173	TYROSINE-PROTEIN KINASE	FYN3	TK	3	H	39	357659	0.0652124	0.212863
470	dd_Smed_v6_9416_0_2	Homo sapiens	FYN proto-oncogene, Src family tyrosine kinase	2e-173	TYROSINE-PROTEIN KINASE	FYN3	TK	4	H	34	561198	0.0453859	-0.310039
471	dd_Smed_v6_7454_0_1	Aplysia californica	latrophilin-3-like	2e-31	G-PROTEIN COUPLED RECEPTOR	LPHN3	GPCR	1	H	44	788106	0.0495633	-0.18301
472	dd_Smed_v6_7454_0_1	Aplysia californica	latrophilin-3-like	2e-31	G-PROTEIN COUPLED RECEPTOR	LPHN3	GPCR	2	H	43	581740	0.0563773	0.00283069
473	dd_Smed_v6_7454_0_1	Aplysia californica	latrophilin-3-like	2e-31	G-PROTEIN COUPLED RECEPTOR	LPHN3	GPCR	3	H	56	410921	0.0873592	0.634678
474	dd_Smed_v6_11561_0_1	Homo sapiens	FYN proto-oncogene, Src family tyrosine kinase	0	TYROSINE-PROTEIN KINASE	FYN2	TK	1	H	39	301950	0.0709736	0.335001
475	dd_Smed_v6_11561_0_1	Homo sapiens	FYN proto-oncogene, Src family tyrosine kinase	0	TYROSINE-PROTEIN KINASE	FYN2	TK	2	H	27	427453	0.0412971	-0.446242
476	dd_Smed_v6_11561_0_1	Homo sapiens	FYN proto-oncogene, Src family tyrosine kinase	0	TYROSINE-PROTEIN KINASE	FYN2	TK	3	H	43	474554	0.0624203	0.149732
477	dd_Smed_v6_11561_0_1	Homo sapiens	FYN proto-oncogene, Src family tyrosine kinase	0	TYROSINE-PROTEIN KINASE	FYN2	TK	4	H	48	645100	0.0597624	0.0869543
478	dd_Smed_v6_10115_0_1	Drosophila melanogaster	Activated Cdc42 kinase-like	5e-74	TYROSINE-PROTEIN KINASE	TK1b	TK	1	H	39	378951	0.0633539	0.17115
479	dd_Smed_v6_10115_0_1	Drosophila melanogaster	Activated Cdc42 kinase-like	5e-74	TYROSINE-PROTEIN KINASE	TK1b	TK	2	H	38	385309	0.061218	0.121673
480	dd_Smed_v6_10115_0_1	Drosophila melanogaster	Activated Cdc42 kinase-like	5e-74	TYROSINE-PROTEIN KINASE	TK1b	TK	3	H	49	678665	0.0594796	0.0801132
481	dd_Smed_v6_10115_0_1	Drosophila melanogaster	Activated Cdc42 kinase-like	5e-74	TYROSINE-PROTEIN KINASE	TK1b	TK	4	H	43	458932	0.0634737	0.173877
482	dd_Smed_v6_8571_0_1	Homo sapiens	ABL proto-oncogene 1, non-receptor tyrosine kinase	5e-171	TYROSINE-PROTEIN KINASE	ABL1	TK	1	H	39	478605	0.0563736	0.00273767
483	dd_Smed_v6_8571_0_1	Homo sapiens	ABL proto-oncogene 1, non-receptor tyrosine kinase	5e-171	TYROSINE-PROTEIN KINASE	ABL1	TK	2	H	47	624375	0.0594806	0.0801357
484	dd_Smed_v6_8571_0_1	Homo sapiens	ABL proto-oncogene 1, non-receptor tyrosine kinase	5e-171	TYROSINE-PROTEIN KINASE	ABL1	TK	3	H	35	466177	0.0512617	-0.134403
485	dd_Smed_v6_8571_0_1	Homo sapiens	ABL proto-oncogene 1, non-receptor tyrosine kinase	5e-171	TYROSINE-PROTEIN KINASE	ABL1	TK	4	H	25	315105	0.0445361	-0.337307
486	dd_Smed_v6_11488_0_1	Ixodes scapularis	allatostatin receptor, putative	3e-08	G-PROTEIN COUPLED RECEPTOR-RELATED	ALSTR	GPCR	1	H	53	665930	0.0649474	0.206988
487	dd_Smed_v6_11488_0_1	Ixodes scapularis	allatostatin receptor, putative	3e-08	G-PROTEIN COUPLED RECEPTOR-RELATED	ALSTR	GPCR	2	H	48	616422	0.0611367	0.119757
488	dd_Smed_v6_11488_0_1	Ixodes scapularis	allatostatin receptor, putative	3e-08	G-PROTEIN COUPLED RECEPTOR-RELATED	ALSTR	GPCR	3	H	51	427345	0.0780155	0.471478
489	dd_Smed_v6_13356_0_1	Homo sapiens	frizzled class receptor 4	2e-94	FRIZZLED	FZD4	FZD	1	H	38	471298	0.0553523	-0.0236383
490	dd_Smed_v6_13356_0_1	Homo sapiens	frizzled class receptor 4	2e-94	FRIZZLED	FZD4	FZD	2	H	38	462842	0.0558556	-0.01058
491	dd_Smed_v6_13356_0_1	Homo sapiens	frizzled class receptor 4	2e-94	FRIZZLED	FZD4	FZD	3	H	37	489139	0.0529037	-0.0889153
492	dd_Smed_v6_13356_0_1	Homo sapiens	frizzled class receptor 4	2e-94	FRIZZLED	FZD4	FZD	4	H	34	340556	0.0582619	0.0502695
493	dd_Smed_v6_12571_0_1	Drosophila melanogaster	Discoidin domain receptor	3e-33	TYROSINE-PROTEIN KINASE RECEPTOR	DDR	RTK	1	H	36	512219	0.0503008	-0.161702
494	dd_Smed_v6_12571_0_1	Drosophila melanogaster	Discoidin domain receptor	3e-33	TYROSINE-PROTEIN KINASE RECEPTOR	DDR	RTK	2	H	50	627084	0.0631404	0.16628
495	dd_Smed_v6_12571_0_1	Drosophila melanogaster	Discoidin domain receptor	3e-33	TYROSINE-PROTEIN KINASE RECEPTOR	DDR	RTK	3	H	45	467176	0.0658373	0.226623
496	dd_Smed_v6_5048_0_1	NA	NA	NA	TYROSINE-PROTEIN KINASE	TK2	TK	1	H	61	401381	0.0962834	0.775004
497	dd_Smed_v6_5048_0_1	NA	NA	NA	TYROSINE-PROTEIN KINASE	TK2	TK	2	H	62	651847	0.0767925	0.448683
498	dd_Smed_v6_5048_0_1	NA	NA	NA	TYROSINE-PROTEIN KINASE	TK2	TK	3	H	47	511397	0.0657232	0.22412
499	dd_Smed_v6_5048_0_1	NA	NA	NA	TYROSINE-PROTEIN KINASE	TK2	TK	4	H	56	273066	0.107165	0.929483
500	dd_Smed_v6_3147_0_1	Aplysia californica	Src tyrosine kinase 1	1e-168	TYROSINE-PROTEIN KINASE	SRC2	SRC	1	H	54	743650	0.0626195	0.154329
501	dd_Smed_v6_3147_0_1	Aplysia californica	Src tyrosine kinase 1	1e-168	TYROSINE-PROTEIN KINASE	SRC2	SRC	2	H	62	557736	0.083019	0.561158
502	dd_Smed_v6_3147_0_1	Aplysia californica	Src tyrosine kinase 1	1e-168	TYROSINE-PROTEIN KINASE	SRC2	SRC	3	H	60	661874	0.0737503	0.390365
503	dd_Smed_v6_3147_0_1	Aplysia californica	Src tyrosine kinase 1	1e-168	TYROSINE-PROTEIN KINASE	SRC2	SRC	4	H	54	680344	0.0654681	0.218508
504	dd_Smed_v6_2017_0_1	Homo sapiens	integrin, beta 1 (fibronectin receptor, beta polypeptide, antigen CD29 includes MDF2, MSK12)	2e-116	INTEGRIN BETA SUBUNIT	ITGB1	integrin	1	H	42	563691	0.0559408	-0.00838165
505	dd_Smed_v6_2017_0_1	Homo sapiens	integrin, beta 1 (fibronectin receptor, beta polypeptide, antigen CD29 includes MDF2, MSK12)	2e-116	INTEGRIN BETA SUBUNIT	ITGB1	integrin	2	H	43	550948	0.0579313	0.0420599
506	dd_Smed_v6_2017_0_1	Homo sapiens	integrin, beta 1 (fibronectin receptor, beta polypeptide, antigen CD29 includes MDF2, MSK12)	2e-116	INTEGRIN BETA SUBUNIT	ITGB1	integrin	3	H	38	469752	0.0554433	-0.0212689
507	dd_Smed_v6_2017_0_1	Homo sapiens	integrin, beta 1 (fibronectin receptor, beta polypeptide, antigen CD29 includes MDF2, MSK12)	2e-116	INTEGRIN BETA SUBUNIT	ITGB1	integrin	4	H	37	407408	0.0579678	0.0429694
508	dd_Smed_v6_3773_0_1	Homo sapiens	dual-specificity tyrosine-(Y)-phosphorylation regulated kinase 1B	1e-145	DUAL SPECIFICITY PROTEIN KINASE	DYRK1B	STK/TK	1	H	26	253271	0.0516631	-0.123148
509	dd_Smed_v6_3773_0_1	Homo sapiens	dual-specificity tyrosine-(Y)-phosphorylation regulated kinase 1B	1e-145	DUAL SPECIFICITY PROTEIN KINASE	DYRK1B	STK/TK	2	H	33	444479	0.0494981	-0.18491
510	dd_Smed_v6_3773_0_1	Homo sapiens	dual-specificity tyrosine-(Y)-phosphorylation regulated kinase 1B	1e-145	DUAL SPECIFICITY PROTEIN KINASE	DYRK1B	STK/TK	3	H	33	407477	0.0516966	-0.122212
511	dd_Smed_v6_6719_0_1	Anolis carolinensis	phospholipase C, gamma 1	1e-117	PHOSPHOINOSITIDE-SPECIFIC PHOSPHOLIPASE C FAMILY P	PLCG1	other signaling	1	H	34	256758	0.0670991	0.254011
512	dd_Smed_v6_6719_0_1	Anolis carolinensis	phospholipase C, gamma 1	1e-117	PHOSPHOINOSITIDE-SPECIFIC PHOSPHOLIPASE C FAMILY P	PLCG1	other signaling	2	H	34	377526	0.0553357	-0.024072
513	dd_Smed_v6_6719_0_1	Anolis carolinensis	phospholipase C, gamma 1	1e-117	PHOSPHOINOSITIDE-SPECIFIC PHOSPHOLIPASE C FAMILY P	PLCG1	other signaling	3	H	32	519570	0.0443944	-0.341906
514	dd_Smed_v6_6719_0_1	Anolis carolinensis	phospholipase C, gamma 1	1e-117	PHOSPHOINOSITIDE-SPECIFIC PHOSPHOLIPASE C FAMILY P	PLCG1	other signaling	4	H	54	662682	0.0663348	0.237482
515	dd_Smed_v6_4352_0_1	Apis mellifera	tyrosine-protein kinase Abl-like	0	TYROSINE-PROTEIN KINASE	ABL1b	TK	1	H	41	471382	0.0597169	0.0858569
516	dd_Smed_v6_4352_0_1	Apis mellifera	tyrosine-protein kinase Abl-like	0	TYROSINE-PROTEIN KINASE	ABL1b	TK	2	H	53	751762	0.0611274	0.119536
517	dd_Smed_v6_4352_0_1	Apis mellifera	tyrosine-protein kinase Abl-like	0	TYROSINE-PROTEIN KINASE	ABL1b	TK	3	H	44	781767	0.0497639	-0.177185
518	dd_Smed_v6_4352_0_1	Apis mellifera	tyrosine-protein kinase Abl-like	0	TYROSINE-PROTEIN KINASE	ABL1b	TK	4	H	49	398052	0.0776651	0.464985
519	dd_Smed_v6_7218_0_1	NA	NA	NA	NA	novel2	other	1	H	40	312706	0.0715306	0.346278
520	dd_Smed_v6_7218_0_1	NA	NA	NA	NA	novel2	other	2	H	38	392288	0.060671	0.108724
521	dd_Smed_v6_7911_0_1	Homo sapiens	receptor tyrosine kinase-like orphan receptor 1	2e-134	TYROSINE-PROTEIN KINASE RECEPTOR	ROR	RTK	1	H	49	321624	0.0864016	0.618776
522	dd_Smed_v6_7911_0_1	Homo sapiens	receptor tyrosine kinase-like orphan receptor 1	2e-134	TYROSINE-PROTEIN KINASE RECEPTOR	ROR	RTK	2	H	41	325401	0.0718744	0.353196
523	dd_Smed_v6_7911_0_1	Homo sapiens	receptor tyrosine kinase-like orphan receptor 1	2e-134	TYROSINE-PROTEIN KINASE RECEPTOR	ROR	RTK	3	H	58	409830	0.0905996	0.687221
524	dd_Smed_v6_7911_0_1	Homo sapiens	receptor tyrosine kinase-like orphan receptor 1	2e-134	TYROSINE-PROTEIN KINASE RECEPTOR	ROR	RTK	4	H	59	755450	0.0678811	0.270728

## Sheet: Fig. 1C_1S3_Tls
Treatment	cto+ cells	fragment size (mm^2)
CNTL	26	0.540971
CNTL	37	0.656964
CNTL	36	0.590244
CNTL	41	0.671878
CNTL	38	0.649181
CNTL	36	0.487515
CNTL	31	0.54693
CNTL	35	0.566548
CNTL	35	0.511656
tec1(RNAi)	83	0.691604
tec1(RNAi)	81	0.849173
tec1(RNAi)	41	0.368834
tec1(RNAi)	65	0.538545
tec1(RNAi)	71	0.536306
tec1(RNAi)	75	0.71671

## Sheet: Fig. 1C_1S3_Hds
Treatment	cto+ cells	fragment size (mm^2)
CNTL	40	0.659244
CNTL	52	0.714389
CNTL	53	0.838599
CNTL	41	0.738647
CNTL	49	0.576548
CNTL	44	0.594074
CNTL	30	0.551037
CNTL	40	0.37621
CNTL	44	0.504172
CNTL	50	0.554042
tec1(RNAi)	76	0.62642
tec1(RNAi)	95	0.684061
tec1(RNAi)	82	0.796169
tec1(RNAi)	79	0.635291
tec1(RNAi)	70	0.674923
tec1(RNAi)	83	0.607375
tec1(RNAi)	72	0.753336
tec1(RNAi)	75	0.558874
tec1(RNAi)	92	0.782178
tec1(RNAi)	71	0.895674

## Sheet: Fig. 1C_Homeostasis
Treatment	cto+ cells	cto+ cells/brain length (mm)
tec1(RNAi)	141	271.208
tec1(RNAi)	112	242.733
tec1(RNAi)	116	211.194
tec1(RNAi)	135	237.892
tec1(RNAi)	139	246.062
tec1(RNAi)	57	196.041
tec1(RNAi)	140	281.646
tec1(RNAi)	117	273.832
CNTL	35	133.4
CNTL	77	137.707
CNTL	58	106.996
CNTL	50	132.486
CNTL	38	121.804
CNTL	48	114.287
CNTL	54	130.602
CNTL	54	135.005

## Sheet: Fig. 1S1B_qPCR
Treatment	log2fc compared to GAPDH
tec1(RNAi)	0.202361
tec1(RNAi)	0.272942
tec1(RNAi)	0.0458056
CNTL	0.845768
CNTL	1.18236
CNTL	1.15803

## Sheet: Fig. 1S4
Treatment	cto+ cells/brain length (mm)
tec1&2(RNAi)	167.681
tec1&2(RNAi)	157.253
tec1&2(RNAi)	190.268
tec1&2(RNAi)	194.007
tec1&2(RNAi)	151.2
tec1&2(RNAi)	173.213
tec1&2(RNAi)	167.947
tec1(RNAi)	184.737
tec1(RNAi)	178.464
tec1(RNAi)	227.45
tec1(RNAi)	128.769
tec1(RNAi)	158.824
tec1(RNAi)	169.794
tec1(RNAi)	116.402
tec1(RNAi)	185.648
tec2(RNAi)	137.633
tec2(RNAi)	113.735
tec2(RNAi)	114.728
tec2(RNAi)	105.855
tec2(RNAi)	101.302
tec2(RNAi)	122.595
tec2(RNAi)	99.4737
tec2(RNAi)	128.426
CNTL	120.974
CNTL	88.358
CNTL	108.621
CNTL	93.3004
CNTL	109.17
CNTL	85.8184
CNTL	109.449
CNTL	122.534

## Sheet: Fig. 2A
Treatment	Brain:Body Ratio	cto+cells/animal length (mm)	cto+ cells/brain length (mm)
tec1(RNAi)	0.269147	42.6696	158.537
tec1(RNAi)	0.219351	38.4361	175.227
tec1(RNAi)	0.223575	26.0983	148.08
tec1(RNAi)	0.277553	48.583	116.732
tec1(RNAi)	0.241531	31.2363	175.041
tec1(RNAi)	0.240552	41.4244	129.326
tec1(RNAi)			172.205
CNTL	0.228954	22.5201	98.3607
CNTL	0.246362	24.4283	99.1561
CNTL	0.231749	21.2224	91.5751
CNTL	0.229323	23.9662	104.508
CNTL	0.245339	24.1525	98.4456
CNTL	0.205075	20.8551	101.695
CNTL	0.252945	20.097	79.4521
CNTL	0.278766	24.911	89.3617
CNTL	0.250442	24.7788	98.9399
CNTL	0.232386	22.1876	95.4774
CNTL	0.22729	18.3979	80.9444
ndk(RNAi)	0.397467	29.0033	72.9702
ndk(RNAi)	0.390739	30.9989	79.334
ndk(RNAi)	0.448129	28.8963	64.482
ndk(RNAi)	0.382353	31.0688	54.6822
ndk(RNAi)	0.346494	31.2316	81.2568
ndk(RNAi)	0.335619	26.5752	90.1361
ndk(RNAi)	0.451266	29.1635	79.1826
ndk(RNAi)	0.425789	28.4379	64.6259
ndk(RNAi)			76.1478
ndk(RNAi)			66.7887

## Sheet: Fig. 2S1_NearestNeighbor
Treatment	Nearest Neighbor Distance (um)
CNTL	133.344
CNTL	91.4866
CNTL	91.4866
CNTL	73.789
CNTL	91.8367
CNTL	91.8367
CNTL	73.789
CNTL	112.514
CNTL	59.8566
CNTL	81.5793
CNTL	59.8566
CNTL	50.5194
CNTL	61.1592
CNTL	81.9362
CNTL	78.0129
CNTL	81.5793
CNTL	81.9362
CNTL	50.5194
CNTL	55.8566
CNTL	55.8566
CNTL	78.0129
CNTL	81.5159
CNTL	69.2108
CNTL	86.665
tec1(RNAi)	51.9798
tec1(RNAi)	66.9434
tec1(RNAi)	62.3598
tec1(RNAi)	35.3992
tec1(RNAi)	36.0468
tec1(RNAi)	31.5737
tec1(RNAi)	29.6118
tec1(RNAi)	86.7801
tec1(RNAi)	107.565
tec1(RNAi)	58.9224
tec1(RNAi)	62.9314
tec1(RNAi)	99.0441
tec1(RNAi)	48.9986
tec1(RNAi)	35.6737
tec1(RNAi)	66.9434
tec1(RNAi)	63.2213
tec1(RNAi)	68.441
tec1(RNAi)	74.7456
tec1(RNAi)	110.266
tec1(RNAi)	96.824
tec1(RNAi)	56.3142
tec1(RNAi)	62.9314
tec1(RNAi)	61.7036
tec1(RNAi)	48.661
tec1(RNAi)	30.9247
tec1(RNAi)	36.0468
tec1(RNAi)	107.565
tec1(RNAi)	48.9986
tec1(RNAi)	89.8303
tec1(RNAi)	68.4497
tec1(RNAi)	102.204
tec1(RNAi)	93.7924
tec1(RNAi)	56.3142
tec1(RNAi)	58.9224
tec1(RNAi)	47.9041
tec1(RNAi)	35.6737
tec1(RNAi)	31.5737
tec1(RNAi)	34.5926
tec1(RNAi)	71.2131
tec1(RNAi)	65.0215
tec1(RNAi)	71.2131
tec1(RNAi)	58.2735
tec1(RNAi)	58.2735
tec1(RNAi)	35.9193
tec1(RNAi)	61.4754
tec1(RNAi)	34.5926
tec1(RNAi)	78.4581
tec1(RNAi)	57.2382
tec1(RNAi)	35.3992
tec1(RNAi)	78.0645
tec1(RNAi)	93.7924
tec1(RNAi)	78.4581
tec1(RNAi)	35.9193
tec1(RNAi)	83.4953
tec1(RNAi)	57.2382
tec1(RNAi)	99.4682
tec1(RNAi)	62.3598
tec1(RNAi)	29.6118
tec1(RNAi)	68.4497
tec1(RNAi)	64.5507
tec1(RNAi)	30.9247

## Sheet: Fig. 2S1_ctocellvolume
Treatment	cto+ cell volume (um^3)
CNTL	736.903
CNTL	585.61
CNTL	727.99
CNTL	794.942
CNTL	585.392
CNTL	892.761
CNTL	136.512
CNTL	1513.8
CNTL	740.381
CNTL	975.799
CNTL	535.396
CNTL	926.237
CNTL	567.133
CNTL	969.929
CNTL	669.951
CNTL	722.991
CNTL	732.773
CNTL	668.43
CNTL	1188.61
CNTL	782.769
CNTL	548.004
CNTL	428.447
CNTL	561.046
CNTL	603.434
tec1(RNAi)	745.44
tec1(RNAi)	722.442
tec1(RNAi)	602.464
tec1(RNAi)	733.86
tec1(RNAi)	518.672
tec1(RNAi)	508.54
tec1(RNAi)	1327
tec1(RNAi)	559.201
tec1(RNAi)	600.051
tec1(RNAi)	528.161
tec1(RNAi)	613.882
tec1(RNAi)	666.634
tec1(RNAi)	600.694
tec1(RNAi)	556.145
tec1(RNAi)	778.732
tec1(RNAi)	639.454
tec1(RNAi)	533.468
tec1(RNAi)	606.967
tec1(RNAi)	375.052
tec1(RNAi)	517.546
tec1(RNAi)	529.287
tec1(RNAi)	542.314
tec1(RNAi)	143.459
tec1(RNAi)	437.293
tec1(RNAi)	592.17
tec1(RNAi)	501.302
tec1(RNAi)	355.27
tec1(RNAi)	1092.03
tec1(RNAi)	1188.68
tec1(RNAi)	346.264
tec1(RNAi)	623.693
tec1(RNAi)	494.869
tec1(RNAi)	474.122
tec1(RNAi)	290.778
tec1(RNAi)	165.653
tec1(RNAi)	441.635
tec1(RNAi)	408.504
tec1(RNAi)	345.781
tec1(RNAi)	505.806
tec1(RNAi)	297.05
tec1(RNAi)	468.493
tec1(RNAi)	369.584
tec1(RNAi)	360.256
tec1(RNAi)	534.594
tec1(RNAi)	348.033
tec1(RNAi)	372.961
tec1(RNAi)	133.327
tec1(RNAi)	314.741
tec1(RNAi)	301.071
tec1(RNAi)	169.352
tec1(RNAi)	404.805
tec1(RNAi)	94.085
tec1(RNAi)	193.959
tec1(RNAi)	560.326
tec1(RNAi)	225.964
tec1(RNAi)	499.855
tec1(RNAi)	428.125
tec1(RNAi)	75.429
tec1(RNAi)	219.692
tec1(RNAi)	126.894
tec1(RNAi)	78.163
tec1(RNAi)	107.916

## Sheet: Fig. 3A_3S1_gad
Treatment	cephalic ganglia gad+ cells/sqrt body area (mm)	VNC gad+ cells/sqrt body area (mm)	gad+ cells/sqrt body area (mm)
tec1(RNAi)	74.2853	21.6203	95.9056
tec1(RNAi)	79.7689	21.4014	101.17
tec1(RNAi)	79.1253	22.9047	102.03
tec1(RNAi)	83.5632	24.2603	107.823
tec1(RNAi)	67.1809	25.1005	92.2814
CNTL	47.1946	15.9982	63.1927
CNTL	42.2102	20.1875	62.3977
CNTL	38.8056	17.4625	56.2681
CNTL	40.4619	20.809	61.2709
CNTL	28.568	13.9177	42.4857
CNTL	48.2211	18.4375	66.6585
CNTL	51.6933	17.2311	68.9244

[truncated: 26 more sheets: Fig. 3A_3B_ppl1, Fig. 3A_dd17258, Fig. 3A_sert, Fig. 3A_trpA, Fig 3A_chat, Fig. 3B_opsin, Fig. 3C_ifcali, Fig. 3C_glut, Fig. 3S2A_3S2B_dd2223, Fig. 3S2A_dd3733, Fig. 3S2A_spp4, Fig. 3S2A_dd2723, Fig. 3S3_cto&gad, Fig. 3S3_cto&ppl1, Fig. 3S5_collagen, Fig. 3S5_epidermis, Fig. 4A_TlsTimecourse, Fig. 4A_HdsTimecourse, Fig. 4B_BrduTimecourse, Fig. 4C_coeTimecourse …]
